# Supplementary material
Source: publisher figshare collection journal article supplement (https://tandf.figshare.com/articles/dataset/_/3395740)
Supplement: Supplementary file 1 [file 1]

| Number | Categories                               | Belgium | Croatia | Czech Republic | Denmark | Finland | France | Germany | Greece | Hungary | Ireland | Italy | Netherlands | Norway | Poland | Portugal | Romania | Slovakia | Spain | Sweden | UK  | Grand Total |
|--------|------------------------------------------|---------|---------|----------------|---------|---------|--------|---------|--------|---------|---------|-------|-------------|--------|--------|----------|---------|----------|-------|--------|-----|-------------|
| 1      | Alcoholic Beverages                      | 3       |         | 6              | 7       | 24      | 14     | 7       | 3      | 15      |         |       | 2           | 6      | 9      | 2        |         |          | 7     | 3      | 5   | 113         |
| 2      | Beer                                     |         |         | 3              | 2       | 1       | 2      | 2       |        | 11      |         |       | 1           |        | 6      |          |         |          | 1     |        |     | 29          |
| 3      | Cider                                    |         |         | 3              | 3       | 16      | 2      | 1       | 2      | 3       |         |       |             | 5      |        | 2        |         |          | 3     | 2      |     | 42          |
| 4      | Flavoured Alcoholic Beverages            | 2       |         |                |         | 7       | 3      | 4       | 1      | 1       |         |       | 1           | 1      | 1      |          |         |          | 2     | 1      | 5   | 29          |
| 5      | Fortified & Other Wines                  |         |         |                | 1       |         |        |         |        |         |         |       |             |        |        |          |         |          |       |        |     | 1           |
| 6      | Liqueur                                  | 1       |         |                |         |         |        |         |        |         |         |       |             |        | 2      |          |         |          | 1     |        |     | 4           |
| 7      | Vodka                                    |         |         |                | 1       |         | 5      |         |        |         |         |       |             |        |        |          |         |          |       |        |     | 6           |
| 8      | Wine                                     |         |         |                |         |         | 2      |         |        |         |         |       |             |        |        |          |         |          |       |        |     | 2           |
| 9      | Baby Food                                |         | 1       | 5              |         |         |        | 1       |        | 2       |         |       |             |        | 3      |          |         |          | 4     |        | 3   | 19          |
| 10     | Baby Cereals                             |         |         |                |         |         |        |         |        | 1       |         |       |             |        |        |          |         |          |       |        |     | 1           |
| 11     | Baby Fruit Products, Desserts & Yogurts  |         | 1       | 5              |         |         |        |         |        | 1       |         |       |             |        | 3      |          |         |          | 3     |        | 1   | 14          |
| 12     | Baby Juices & Drinks                     |         |         |                |         |         |        |         |        |         |         |       |             |        |        |          |         |          | 1     |        |     | 1           |
| 13     | Baby Savoury Meals & Dishes              |         |         |                |         |         |        |         |        |         |         |       |             |        |        |          |         |          |       |        | 1   | 1           |
| 14     | Baby Snacks                              |         |         |                |         |         |        | 1       |        |         |         |       |             |        |        |          |         |          |       |        |     | 2           |
| 15     | Bakery                                   | 10      |         | 7              | 2       | 9       | 71     | 48      | 1      | 3       | 25      | 19    | 6           | 5      | 16     | 13       |         |          | 38    | 6      | 306 | 585         |
| 16     | Baking Ingredients & Mixes               | 1       |         |                | 1       | 1       | 8      | 19      |        |         | 2       |       | 2           | 1      | 2      | 4        |         |          | 11    |        | 67  | 119         |
| 17     | Bread & Bread Products                   |         |         |                |         |         |        |         |        |         | 1       |       |             |        |        |          |         |          |       |        | 2   | 3           |
| 18     | Cakes, Pastries & Sweet Goods            | 4       |         | 5              | 1       | 5       | 35     | 12      | 1      | 2       | 21      | 14    | 3           | 2      | 8      | 1        |         |          | 13    | 2      | 193 | 322         |
| 19     | Savoury Biscuits/Crackers                |         |         |                |         |         | 1      | 1       |        |         |         |       |             |        |        |          |         |          |       |        |     | 2           |
| 20     | Sweet Biscuits/Cookies                   | 5       |         | 2              |         | 3       | 27     | 16      |        | 1       | 1       | 5     | 1           | 2      | 6      | 8        |         |          | 14    | 4      | 44  | 139         |
| 21     | Breakfast Cereals                        | 2       |         |                |         |         | 3      |         | 1      |         | 1       | 1     |             |        |        | 1        |         |          | 1     |        | 9   | 19          |
| 22     | Cold Cereals                             | 2       |         |                |         |         | 3      |         | 1      |         |         | 1     |             |        |        | 1        |         |          | 1     |        | 8   | 17          |
| 23     | Hot Cereals                              |         |         |                |         |         |        |         |        |         | 1       |       |             |        |        |          |         |          |       |        | 1   | 2           |
| 24     | Carbonated Soft Drinks                   | 5       | 1       | 3              | 7       | 10      | 44     | 38      | 1      | 5       | 8       | 6     | 8           | 11     | 12     | 2        | 2       |          | 12    | 7      | 41  | 223         |
|        | Carbonated Soft Drinks                   | 5       | 1       | 3              | 7       | 10      | 44     | 38      | 1      | 5       | 8       | 6     | 8           | 11     | 12     | 2        | 2       |          | 12    | 7      | 41  | 223         |
| 25     | Chocolate Confectionery                  | 11      | 1       | 20             | 6       | 7       | 69     | 66      | 4      | 13      | 6       | 29    | 20          | 9      | 29     | 15       | 2       |          | 21    |        | 97  | 425         |
| 26     | Chocolate Countlines                     |         |         | 3              |         |         | 1      | 1       |        |         |         |       |             | 1      | 1      |          |         |          | 1     |        | 2   | 10          |
| 27     | Chocolate Tablets                        | 1       | 1       | 6              |         | 3       | 10     | 9       | 2      | 8       |         | 2     | 3           | 1      | 16     | 4        |         |          | 6     |        | 8   | 80          |
| 28     | Individually Wrapped Chocolate Pieces    |         |         | 1              |         |         | 2      | 5       |        |         |         |       | 1           | 1      | 4      | 1        |         |          | 2     |        | 8   | 25          |
| 29     | Non-Individually Wrapped Chocolate Piece | 5       |         | 7              | 3       | 3       | 19     | 33      | 2      | 4       | 5       | 23    | 7           | 4      | 1      | 9        |         |          | 8     |        | 29  | 162         |
| 30     | Other Chocolate Confectionery            |         |         |                |         |         | 2      |         |        |         |         |       |             |        |        |          |         |          |       |        |     | 2           |
| 31     | Seasonal Chocolate                       | 5       |         | 3              | 3       | 1       | 35     | 18      |        | 1       | 1       | 4     | 9           | 2      | 7      | 1        | 2       |          | 4     |        | 50  | 146         |
| 32     | Dairy                                    | 27      | 4       | 20             | 3       | 24      | 145    | 69      | 2      | 30      | 39      | 43    | 18          | 9      | 65     | 15       | 3       | 11       | 54    | 9      | 149 | 739         |
| 33     | Cream                                    |         |         |                |         |         |        |         |        |         | 1       |       |             |        |        |          |         |          |       |        | 2   | 3           |
| 34     | Curd & Quark                             |         |         |                |         |         |        | 1       |        |         |         |       |             | 1      |        |          |         |          |       |        |     | 2           |
| 35     | Drinking Yogurt & Liquid Cultured Milk   | 5       | 4       | 10             |         | 4       | 21     | 8       |        | 7       | 7       | 10    | 4           | 1      | 28     | 9        | 2       | 2        | 16    | 4      | 25  | 167         |
| 36     | Flavoured Milk                           |         |         |                |         |         |        |         |        |         |         |       | 1           |        |        |          |         |          | 1     |        | 2   | 4           |
| 37     | Fresh Cheese & Cream Cheese              |         |         |                |         |         |        |         |        |         |         |       |             |        | 1      |          |         |          |       |        | 1   | 2           |
| 38     | Hard Cheese & Semi-Hard Cheese           |         |         |                |         |         |        |         |        |         |         |       |             |        |        |          |         |          |       |        |     |             |
| 39     | Liquid Dairy Other                       |         |         |                |         |         |        | 4       |        |         |         |       |             |        |        |          |         |          |       |        |     | 4           |
| 40     | Processed Cheese                         |         |         |                |         |         | 1      |         |        |         |         |       |             |        |        |          |         |          |       |        |     | 1           |
| 41     | Soft Cheese & Semi-Soft Cheese           |         |         |                |         |         |        |         |        |         |         |       |             |        |        |          |         |          |       |        |     |             |
| 42     | Soft Cheese Desserts                     | 4       |         | 3              | 2       | 10      | 28     | 10      |        | 4       |         | 1     | 3           | 1      | 7      |          |         | 1        | 3     | 3      | 25  | 105         |
| 43     | Soy Based Drinks                         |         |         |                |         |         |        |         |        |         |         |       |             |        |        |          |         |          |       |        | 1   | 1           |
| 44     | Soy Yogurt                               |         |         |                |         | 1       | 2      |         |        |         |         | 3     |             |        |        | 1        |         |          | 1     |        | 4   | 12          |
| 45     | Spoonable Yogurt                         | 18      |         | 7              | 1       | 9       | 93     | 46      | 2      | 19      | 31      | 29    | 10          | 6      | 29     | 5        | 1       | 8        | 33    | 2      | 89  | 438         |
| 46     | Desserts & Ice Cream                     | 14      | 3       | 10             | 6       | 23      | 99     | 61      | 10     | 2       | 17      | 55    | 19          | 21     | 41     | 14       |         |          | 43    | 2      | 195 | 635         |
| 47     | Chilled Desserts                         |         |         | 2              | 1       |         | 21     | 13      | 1      | 2       | 6       | 2     | 3           |        | 8      |          |         |          | 5     |        | 68  | 132         |
| 48     | Dairy-Based Frozen Products              | 9       | 3       | 2              | 1       | 12      | 52     | 28      | 6      |         | 3       | 41    | 11          | 6      | 5      | 1        |         |          | 18    | 2      | 49  | 249         |
| 49     | Dessert Toppings                         |         |         |                |         | 1       |        | 2       |        |         | 1       | 2     |             |        |        | 1        |         |          | 1     |        | 1   | 9           |
| 50     | Other Frozen Desserts                    | 2       |         | 4              |         |         | 3      | 6       | 1      |         | 2       | 1     | 1           | 1      |        |          |         |          | 2     |        | 19  | 42          |

| Number | Categories                            | Belgium | Croatia | Czech Republic | Denmark | Finland | France | Germany | Greece | Hungary | Ireland | Italy | Netherlands | Norway | Poland | Portugal | Romania | Slovakia | Spain | Sweden | UK | Grand Total |
|--------|---------------------------------------|---------|---------|----------------|---------|---------|--------|---------|--------|---------|---------|-------|-------------|--------|--------|----------|---------|----------|-------|--------|----|-------------|
| 51     | Shelf-Stable Desserts                 |         |         | 1              | 2       | 4       | 5      | 6       | 1      |         | 2       |       |             | 7      | 24     | 12       |         |          | 10    |        | 39 | 113         |
| 52     | Soy-Based Frozen Products             |         |         |                | 1       | 2       |        |         | 1      |         |         |       |             |        |        |          |         |          |       |        |    | 4           |
| 53     | Water-Based Frozen Desserts           | 3       |         | 1              | 1       | 4       | 18     | 6       |        |         | 3       | 9     | 4           | 7      | 4      |          |         |          | 7     |        | 19 | 86          |
| 54     | Fruit & Vegetables                    | 1       |         |                | 3       |         | 2      | 6       | 1      |         | 3       |       | 4           |        | 1      | 1        |         |          |       |        | 9  | 31          |
| 55     | Fruit                                 | 1       |         |                | 3       |         | 2      | 5       | 1      |         | 2       |       | 4           |        | 1      | 1        |         |          |       |        | 9  | 29          |
| 56     | Vegetables                            |         |         |                |         |         |        | 1       |        |         | 1       |       |             |        |        |          |         | 1        |       |        |    | 2           |
| 57     | Hot Beverages                         |         |         |                |         | 1       | 1      |         |        |         |         | 1     |             |        |        |          |         |          |       |        | 1  | 4           |
| 58     | Tea                                   |         |         |                |         | 1       | 1      |         |        |         |         | 1     |             |        |        |          |         |          |       |        | 1  | 4           |
| 59     | Juice Drinks                          | 7       |         | 9              | 1       | 7       | 39     | 18      |        | 8       | 20      | 41    | 9           | 3      | 34     | 4        | 1       |          | 19    | 4      | 77 | 301         |
| 60     | Fruit/Flavoured Still Drinks          | 4       |         | 7              | 1       | 7       | 30     | 12      |        | 7       | 11      | 14    | 5           | 2      | 30     | 2        | 1       |          | 12    | 3      | 45 | 193         |
| 61     | Juice                                 |         |         |                |         |         | 3      | 3       |        |         | 6       | 1     |             |        |        |          |         |          | 1     | 1      | 9  | 24          |
| 62     | Nectars                               | 3       |         | 2              |         |         | 6      | 3       |        | 1       | 3       | 26    | 4           | 1      | 4      | 2        |         |          | 6     |        | 23 | 84          |
| 63     | Meals & Meal Centers                  | 1       |         |                |         |         | 9      | 1       |        |         | 4       |       | 2           | 1      | 3      |          |         |          | 2     |        | 8  | 31          |
| 64     | Instant Noodles                       |         |         |                |         |         |        |         |        |         |         |       |             |        |        |          |         |          | 2     |        | 2  | 4           |
| 65     | Meal Kits                             |         |         |                |         |         | 3      |         |        |         |         |       |             |        |        |          |         |          |       |        |    | 3           |
| 66     | Pizzas                                |         |         |                |         |         |        |         |        |         | 4       |       |             |        |        |          |         |          |       |        | 5  | 9           |
| 67     | Prepared Meals                        | 1       |         |                |         |         | 2      | 1       |        |         |         |       | 2           | 1      | 3      |          |         |          |       |        |    | 10          |
| 68     | Salads                                |         |         |                |         |         | 4      |         |        |         |         |       |             |        |        |          |         |          |       |        |    | 4           |
| 69     | Sandwiches/Wraps                      |         |         |                |         |         |        |         |        |         |         |       |             |        |        |          |         |          |       |        | 1  | 1           |
| 70     | Other Beverages                       | 8       |         | 13             | 1       | 6       | 38     | 15      |        | 4       | 13      | 1     | 8           | 8      | 8      |          | 1       |          | 3     | 5      | 72 | 204         |
| 71     | Beverage Concentrates                 | 8       |         | 7              | 1       | 4       | 38     | 10      |        | 2       | 13      | 1     | 8           | 7      | 8      |          | 1       |          | 2     | 4      | 69 | 183         |
| 72     | Beverage Mixes                        |         |         | 6              |         |         |        | 5       |        | 2       |         |       |             |        |        |          |         |          | 1     |        | 2  | 16          |
| 73     | Meal Replacements & Other Drinks      |         |         |                |         | 2       |        |         |        |         |         |       |             | 1      |        |          |         |          |       | 1      | 1  | 5           |
| 74     | Processed Fish, Meat & Egg Products   |         |         | 1              |         |         | 2      | 9       | 2      |         | 2       | 1     | 2           |        |        |          |         |          | 2     | 1      | 3  | 25          |
| 75     | Fish Products                         |         |         |                |         |         | 1      | 6       | 2      |         |         | 1     |             |        |        |          |         |          | 2     |        | 2  | 14          |
| 76     | Meat Products                         |         |         |                |         |         | 1      |         |        |         |         |       |             |        |        |          |         |          |       |        | 1  | 2           |
| 77     | Meat Substitutes                      |         |         | 1              |         |         |        | 3       |        |         |         |       | 2           |        |        |          |         |          |       | 1      |    | 7           |
| 78     | Poultry Products                      |         |         |                |         |         |        |         |        |         | 2       |       |             |        |        |          |         |          |       |        |    | 2           |
| 79     | RTDs                                  |         |         |                | 1       | 1       |        | 4       | 1      | 3       |         | 3     | 2           |        | 2      |          |         |          | 1     |        | 1  | 19          |
| 80     | RTD (Iced) Tea                        |         |         |                | 1       | 1       |        | 4       | 1      | 3       |         | 3     | 2           |        | 2      |          |         |          | 1     |        | 1  | 19          |
| 81     | Sauces & Seasonings                   | 1       |         |                |         | 2       | 10     | 6       | 2      |         |         |       |             |        | 14     |          |         |          | 9     | 2      | 4  | 50          |
| 82     | Cooking Sauces                        |         |         |                |         | 1       |        | 2       | 1      |         |         |       |             |        | 3      |          |         |          | 2     | 1      |    | 10          |
| 83     | Dressings & Vinegar                   |         |         |                |         |         | 4      |         |        |         |         |       |             |        |        |          |         |          | 1     |        |    | 5           |
| 84     | Other Sauces & Seasonings             |         |         |                |         |         |        |         |        |         |         |       |             |        |        |          |         |          |       |        | 1  | 1           |
| 85     | Pasta Sauces                          |         |         |                |         |         |        |         |        |         |         |       |             |        | 4      |          |         |          |       |        |    | 4           |
| 86     | Pickled Condiments                    |         |         |                |         |         | 2      | 1       |        |         |         |       |             |        | 1      |          |         |          | 3     |        | 3  | 10          |
| 87     | Seasonings                            |         |         |                |         |         | 1      |         |        |         |         |       |             |        |        |          |         |          | 1     |        |    | 2           |
| 88     | Table Sauces                          | 1       |         |                |         | 1       | 3      | 3       | 1      |         |         |       |             |        | 6      |          |         |          | 2     | 1      |    | 18          |
| 89     | Savoury Spreads                       |         |         |                |         |         |        | 2       |        |         |         |       |             |        |        |          |         |          |       |        |    | 2           |
| 90     | Meat Pastes & Pates                   |         |         |                |         |         |        | 2       |        |         |         |       |             |        |        |          |         |          |       |        |    | 2           |
| 91     | Savoury Vegetable Pastes/Spreads      |         |         |                |         |         |        |         |        |         |         |       |             |        |        |          |         |          |       |        |    |             |
| 92     | Side Dishes                           |         |         |                |         | 1       |        |         |        |         |         |       |             |        |        |          |         |          |       |        | 1  | 2           |
| 93     | Potato Products                       |         |         |                |         | 1       |        |         |        |         |         |       |             |        |        |          |         |          |       |        |    | 1           |
| 94     | Rice                                  |         |         |                |         |         |        |         |        |         |         |       |             |        |        |          |         |          |       |        | 1  | 1           |
| 95     | Stuffing, Polenta & Other Side Dishes |         |         |                |         |         |        |         |        |         |         |       |             |        |        |          |         |          |       |        |    |             |
| 96     | Snacks                                | 2       | 3       |                | 5       | 3       | 1      | 19      | 13     | 2       | 1       | 6     | 1           | 4      | 4      | 1        | 3       |          | 11    |        | 64 | 143         |
| 97     | Corn-Based Snacks                     |         |         |                |         |         |        |         |        |         |         |       |             |        |        |          |         |          | 1     |        |    | 1           |
| 98     | Fruit Snacks                          | 1       |         |                | 2       |         | 3      | 1       |        |         | 2       | 1     | 1           |        |        |          |         |          | 1     |        | 35 | 47          |
| 99     | Hors d'oeuvres/Canapes                |         |         |                |         |         | 3      | 2       |        |         |         |       | 1           |        |        |          |         |          | 1     |        | 2  | 9           |
| 100    | Nuts                                  |         |         |                |         |         |        |         |        |         |         |       |             |        |        |          |         |          |       |        |    |             |
| 101    | Popcorn                               |         |         |                |         |         |        |         |        |         |         |       |             |        |        |          |         |          |       |        | 1  | 1           |

Supplementary B1. Product releases containing anthocyanins E163

| Number                 | Categories                       | Belgium | Croatia | Czech Republic | Denmark | Finland | France | Germany | Greece | Hungary | Ireland | Italy | Netherlands | Norway | Poland | Portugal | Romania | Slovakia | Spain | Sweden | UK   | Grand Total |
|------------------------|----------------------------------|---------|---------|----------------|---------|---------|--------|---------|--------|---------|---------|-------|-------------|--------|--------|----------|---------|----------|-------|--------|------|-------------|
| 102                    | Rice Snacks                      |         |         |                |         |         |        |         |        |         |         |       |             |        |        |          | 1       |          |       |        |      | 1           |
| 103                    | Snack Mixes                      |         |         |                |         |         | 8      | 2       |        |         |         |       | 1           | 2      |        | 1        |         |          | 2     |        | 2    | 18          |
| 104                    | Snack/Cereal/Energy Bars         | 1       | 3       | 5              | 1       | 1       | 5      | 8       | 2      | 1       | 4       |       |             |        | 1      | 1        | 1       |          | 5     |        | 22   | 61          |
| 105                    | Vegetable Snacks                 |         |         |                |         |         |        |         |        |         |         |       | 1           | 1      |        |          |         |          |       |        | 2    | 4           |
| 106                    | Wheat & Other Grain-Based Snacks |         |         |                |         |         |        |         |        |         |         |       |             |        |        |          |         |          | 1     |        |      | 1           |
| 107                    | Sports & Energy Drinks           | 7       |         | 7              | 4       | 10      | 15     | 20      | 2      | 9       | 3       | 7     | 7           | 12     | 7      | 4        | 1       | 1        | 11    |        | 55   | 182         |
| 108                    | Energy Drinks                    | 7       |         | 6              | 4       | 9       | 8      | 18      | 2      | 8       | 2       | 3     | 6           | 11     | 6      | 4        | 1       | 1        | 6     |        | 39   | 141         |
| 109                    | Sports Drinks                    |         |         | 1              |         | 1       | 7      | 2       |        | 1       | 1       | 4     | 1           | 1      | 1      |          |         |          | 5     |        | 16   | 41          |
| 110                    | Sugar & Gum Confectionery        | 33      | 1       | 25             | 8       | 34      | 225    | 171     | 10     | 30      | 30      | 55    | 66          | 34     | 41     | 34       | 3       | 7        | 72    | 6      | 514  | 1399        |
| 111                    | Boiled Sweets                    | 1       |         | 2              |         |         | 11     | 11      |        | 6       | 3       | 1     | 3           |        | 9      | 5        |         |          | 4     |        | 65   | 121         |
| 112                    | Gum                              | 2       |         | 1              | 1       | 1       | 8      | 12      | 5      | 1       |         | 2     | 3           | 1      | 1      | 2        |         |          | 8     | 1      | 6    | 55          |
| 113                    | Liquorice                        |         |         | 1              | 1       |         | 1      | 1       |        |         |         |       |             | 3      |        | 2        |         |          | 2     |        | 15   | 26          |
| 114                    | Lollipops                        | 3       |         | 3              |         | 2       | 6      | 11      |        |         | 1       | 2     | 6           |        | 2      | 2        |         |          | 3     |        | 27   | 68          |
| 115                    | Marshmallows                     |         |         |                |         |         | 4      | 3       |        |         |         | 1     |             | 1      |        | 2        |         |          |       |        | 4    | 15          |
| 116                    | Medicated Confectionery          |         |         | 2              | 1       | 2       |        | 8       | 1      | 1       | 1       | 2     | 1           | 1      | 2      | 1        |         |          | 6     | 1      | 18   | 48          |
| 117                    | Mixed Assortments                | 4       |         |                | 1       | 10      | 27     | 14      |        |         |         | 3     | 6           | 3      |        | 1        |         |          | 5     | 2      | 23   | 99          |
| 118                    | Other Sugar Confectionery        |         |         |                |         |         | 4      | 21      |        | 1       | 1       | 3     | 6           | 2      |        | 1        | 1       |          | 5     |        | 23   | 68          |
| 119                    | Pastilles, Gums, Jellies & Chews | 22      | 1       | 14             | 3       | 19      | 161    | 88      | 4      | 20      | 24      | 39    | 38          | 20     | 26     | 15       | 2       | 7        | 34    | 2      | 314  | 853         |
| 120                    | Standard & Power Mints           |         |         | 1              |         |         | 1      |         |        | 1       |         |       | 1           | 2      | 1      |          |         |          |       |        | 7    | 14          |
| 121                    | Sticks, Liquids & Sprays         |         |         |                | 1       |         |        |         |        |         |         |       | 1           | 1      |        | 1        |         |          |       |        | 8    | 12          |
| 122                    | Toffees, Caramels & Nougat       | 1       |         | 1              |         |         | 2      | 2       |        |         |         | 2     | 1           |        |        | 2        |         |          | 5     |        | 4    | 20          |
| 123                    | Sweet Spreads                    |         |         | 3              | 1       |         |        | 3       | 1      |         |         | 1     | 2           |        | 10     | 1        |         |          |       |        | 6    | 28          |
| 124                    | Chocolate Spreads                |         |         |                |         |         |        |         |        |         |         |       | 1           |        |        | 1        |         |          |       |        |      | 2           |
| 125                    | Confiture & Fruit Spreads        |         |         | 3              | 1       |         |        | 3       | 1      |         |         |       | 1           |        | 10     |          |         |          |       |        | 6    | 25          |
| 126                    | Honey                            |         |         |                |         |         |        |         |        |         |         | 1     |             |        |        |          |         |          |       |        |      | 1           |
| 127                    | Sweeteners & Sugar               |         |         |                |         |         | 2      |         |        |         |         |       |             |        |        | 1        |         |          |       |        |      | 3           |
| 128                    | Sucrose                          |         |         |                |         |         | 2      |         |        |         |         |       |             |        |        | 1        |         |          |       |        |      | 3           |
| 129                    | Water                            |         |         |                | 3       | 1       | 6      | 5       |        |         |         | 1     |             | 2      | 3      |          |         |          |       | 2      | 10   | 33          |
|                        | Flavoured Water                  |         |         |                | 3       | 1       | 6      | 5       |        |         |         | 1     |             | 2      | 3      |          |         |          |       | 2      | 10   | 33          |
| Total (sub-categories) |                                  | 132     | 13      | 134            | 56      | 160     | 813    | 563     | 43     | 125     | 177     | 265   | 179         | 125    | 299    | 110      | 13      | 19       | 310   | 47     | 1629 | 5213        |

## Supplementary B2. Product releases containing colouring foods

| Number | Categories                                | Belgium | Croatia | Czech Republic | Denmark | Finland | France | Germany | Greece | Hungary | Ireland | Italy | Netherlands | Norway | Poland | Portugal | Romania | Slovakia | Spain | Sweden | UK | Grand Total |
|--------|-------------------------------------------|---------|---------|----------------|---------|---------|--------|---------|--------|---------|---------|-------|-------------|--------|--------|----------|---------|----------|-------|--------|----|-------------|
| 1      | <b>Alcoholic Beverages</b>                | 4       |         | 3              | 1       | 1       | 11     | 10      |        | 9       |         |       | 3           |        | 11     | 1        |         |          |       |        | 2  | 56          |
| 2      | Beer                                      | 3       |         | 3              |         |         | 8      | 7       |        | 6       |         |       | 3           |        | 10     |          |         |          |       |        | 1  | 41          |
| 3      | Cider                                     |         |         |                | 1       | 1       | 2      |         |        | 2       |         |       |             |        |        | 1        |         |          |       |        |    | 7           |
| 4      | Flavoured Alcoholic Beverages             |         |         |                |         |         | 1      | 3       |        | 1       |         |       |             |        | 1      |          |         |          |       |        | 1  | 7           |
| 5      | Fortified & Other Wines                   |         |         |                |         |         |        |         |        |         |         |       |             |        |        |          |         |          |       |        |    |             |
| 6      | Liqueur                                   | 1       |         |                |         |         |        |         |        |         |         |       |             |        |        |          |         |          |       |        |    | 1           |
| 7      | Vodka                                     |         |         |                |         |         |        |         |        |         |         |       |             |        |        |          |         |          |       |        |    |             |
| 8      | Wine                                      |         |         |                |         |         |        |         |        |         |         |       |             |        |        |          |         |          |       |        |    |             |
| 9      | <b>Baby Food</b>                          |         | 1       | 6              |         |         |        | 1       |        | 2       |         |       |             |        | 4      |          |         |          | 6     |        | 4  | 24          |
| 10     | Baby Cereals                              |         |         |                |         |         |        |         |        | 1       |         |       |             |        |        |          |         |          |       |        |    | 1           |
| 11     | Baby Fruit Products, Desserts & Yogurts   |         | 1       | 5              |         |         |        |         |        |         |         |       |             |        | 4      |          |         |          | 5     |        | 1  | 16          |
| 12     | Baby Juices & Drinks                      |         |         | 1              |         |         |        |         |        | 1       |         |       |             |        |        |          |         |          | 1     |        |    | 3           |
| 13     | Baby Savoury Meals & Dishes               |         |         |                |         |         |        |         |        |         |         |       |             |        |        |          |         |          |       |        | 1  | 1           |
| 14     | Baby Snacks                               |         |         |                |         |         |        | 1       |        |         |         |       |             |        |        |          |         |          |       |        | 2  | 3           |
| 15     | <b>Bakery</b>                             | 7       |         | 6              |         | 8       | 42     | 33      |        | 3       | 9       | 7     | 6           | 3      | 18     | 5        | 1       |          | 11    | 4      | 61 | 224         |
| 16     | Baking Ingredients & Mixes                | 1       |         |                |         | 1       | 2      | 1       |        |         | 1       |       | 2           | 1      | 1      |          |         |          | 1     |        | 20 | 31          |
| 17     | Bread & Bread Products                    | 1       |         |                |         |         |        | 1       |        |         | 1       |       |             | 1      |        |          |         |          |       |        | 2  | 6           |
| 18     | Cakes, Pastries & Sweet Goods             | 1       |         | 3              |         | 6       | 23     | 13      |        | 1       | 7       | 3     | 2           | 1      | 9      | 1        | 1       |          | 5     | 2      | 31 | 109         |
| 19     | Savoury Biscuits/Crackers                 |         |         |                |         |         | 1      | 1       |        |         |         |       |             |        |        |          |         |          | 1     |        |    | 3           |
| 20     | Sweet Biscuits/Cookies                    | 4       |         | 3              |         | 1       | 16     | 17      |        | 2       |         | 4     | 2           |        | 8      | 4        |         |          | 4     | 2      | 8  | 75          |
| 21     | <b>Breakfast Cereals</b>                  |         |         | 2              |         |         | 1      | 8       | 1      | 2       | 3       | 2     |             |        | 1      |          |         |          | 2     | 3      | 10 | 35          |
| 22     | Cold Cereals                              |         |         | 2              |         |         | 1      | 8       | 1      | 2       | 3       | 2     |             |        | 1      |          |         |          | 2     | 3      | 10 | 35          |
| 23     | Hot Cereals                               |         |         |                |         |         |        |         |        |         |         |       |             |        |        |          |         |          |       |        |    |             |
| 24     | <b>Carbonated Soft Drinks</b>             | 3       |         |                |         | 1       | 16     | 41      | 1      | 3       | 2       | 3     | 6           | 4      | 10     |          |         |          | 1     | 3      | 15 | 109         |
|        | Carbonated Soft Drinks                    | 3       |         |                |         | 1       | 16     | 41      | 1      | 3       | 2       | 3     | 6           | 4      | 10     |          |         |          | 1     | 3      | 15 | 109         |
| 25     | <b>Chocolate Confectionery</b>            | 3       | 1       | 13             | 3       | 2       | 31     | 74      | 2      | 6       | 2       | 8     | 11          | 4      | 13     | 2        | 3       |          | 10    |        | 37 | 225         |
| 26     | Chocolate Countlines                      |         |         | 3              |         |         | 1      | 1       |        |         |         |       |             |        | 1      |          |         |          |       |        | 2  | 8           |
| 27     | Chocolate Tablets                         | 1       |         | 5              |         | 1       | 1      | 14      |        | 5       | 1       | 1     |             |        | 8      | 1        | 1       |          | 4     |        | 4  | 48          |
| 28     | Individually Wrapped Chocolate Pieces     |         |         | 1              |         |         | 2      | 3       |        |         |         |       | 1           | 1      | 1      |          |         |          |       |        | 1  | 10          |
| 29     | Non-Individually Wrapped Chocolate Pieces |         |         | 3              | 1       | 1       | 8      | 29      | 2      |         | 1       | 5     | 3           | 2      | 2      | 1        |         |          | 6     |        | 7  | 71          |
| 30     | Other Chocolate Confectionery             |         |         |                |         |         |        |         |        |         |         |       |             |        |        |          |         |          |       |        |    |             |
| 31     | Seasonal Chocolate                        | 2       | 1       | 1              | 2       |         | 19     | 27      |        | 1       |         | 2     | 6           | 1      | 1      |          | 2       |          |       |        | 23 | 88          |
| 32     | <b>Dairy</b>                              | 20      | 5       | 15             | 7       | 29      | 86     | 96      | 2      | 19      | 16      | 45    | 18          | 16     | 53     | 8        | 3       | 8        | 19    | 9      | 82 | 556         |
| 33     | Cream                                     |         |         |                |         |         |        |         |        |         |         |       |             |        |        |          |         |          |       |        |    |             |
| 34     | Curd & Quark                              |         |         |                |         |         |        |         |        |         |         |       |             | 1      |        |          |         |          |       |        |    | 1           |
| 35     | Drinking Yogurt & Liquid Cultured Milk    | 3       | 4       | 5              | 2       | 6       | 11     | 8       |        | 4       | 2       | 12    | 4           | 2      | 23     |          | 2       | 1        | 2     | 3      | 8  | 102         |
| 36     | Flavoured Milk                            |         |         |                |         |         |        |         |        | 1       |         |       | 1           |        |        |          |         |          |       |        | 5  | 7           |
| 37     | Fresh Cheese & Cream Cheese               |         |         |                |         |         |        |         |        |         |         |       |             |        |        |          |         |          |       |        |    |             |
| 38     | Hard Cheese & Semi-Hard Cheese            |         |         | 1              |         |         |        |         |        |         |         |       |             |        |        |          |         |          |       |        | 1  | 2           |
| 39     | Liquid Dairy Other                        |         |         |                |         |         |        | 2       |        | 1       |         |       |             |        |        |          |         |          |       |        |    | 3           |
| 40     | Processed Cheese                          |         |         |                |         |         |        |         |        |         |         |       |             |        |        |          |         |          |       |        |    |             |
| 41     | Soft Cheese & Semi-Soft Cheese            |         |         |                |         |         |        | 1       |        |         |         |       |             |        |        |          |         |          |       |        |    | 1           |
| 42     | Soft Cheese Desserts                      | 2       |         | 3              | 2       | 11      | 19     | 10      |        | 3       |         | 2     | 4           | 2      | 7      |          |         | 1        | 3     | 4      | 17 | 90          |
| 43     | Soy Based Drinks                          |         |         |                |         |         |        |         |        | 1       |         |       |             |        |        |          |         |          |       |        |    | 1           |
| 44     | Soy Yogurt                                | 1       |         |                |         | 1       | 4      | 1       |        |         |         | 3     |             |        |        |          | 1       |          | 3     |        | 6  | 20          |
| 45     | Spoonable Yogurt                          | 14      | 1       | 6              | 3       | 11      | 52     | 74      | 2      | 10      | 13      | 28    | 9           | 11     | 23     | 7        | 1       | 6        | 11    | 2      | 45 | 329         |
| 46     | <b>Desserts &amp; Ice Cream</b>           | 11      | 2       | 9              | 4       | 23      | 68     | 87      | 13     | 1       | 8       | 18    | 16          | 12     | 16     | 6        |         |          | 37    | 3      | 58 | 392         |
| 47     | Chilled Desserts                          |         |         | 1              |         |         | 4      | 8       |        | 1       |         | 1     |             | 1      | 4      |          |         |          | 2     |        | 10 | 32          |
| 48     | Dairy-Based Frozen Products               | 7       | 2       | 6              | 1       | 9       | 40     | 44      | 11     |         | 4       | 13    | 10          | 4      | 3      | 3        |         |          | 23    | 3      | 26 | 209         |
| 49     | Dessert Toppings                          |         |         |                |         |         |        |         |        |         | 1       |       |             |        |        |          |         |          | 1     |        | 1  | 3           |
| 50     | Other Frozen Desserts                     |         |         |                | 2       | 5       | 3      | 18      | 2      |         | 2       |       | 1           | 1      |        |          |         |          | 1     |        | 10 | 45          |

## Supplementary B2. Product releases containing colouring foods

[illegible]

## Supplementary B2. Product releases containing colouring foods

| Number                        | Categories                           | Belgium   | Croatia   | Czech Republic | Denmark   | Finland   | France     | Germany    | Greece    | Hungary   | Ireland   | Italy      | Netherlands | Norway    | Poland     | Portugal  | Romania   | Slovakia  | Spain      | Sweden    | UK         | Grand Total |
|-------------------------------|--------------------------------------|-----------|-----------|----------------|-----------|-----------|------------|------------|-----------|-----------|-----------|------------|-------------|-----------|------------|-----------|-----------|-----------|------------|-----------|------------|-------------|
| 102                           | Rice Snacks                          |           |           |                |           |           |            |            |           |           |           |            |             |           |            |           |           |           |            |           |            |             |
| 103                           | Snack Mixes                          |           |           | 1              |           |           | 4          | 1          |           |           |           | 1          |             |           |            |           |           |           | 1          |           | 6          | 14          |
| 104                           | Snack/Cereal/Energy Bars             |           |           | 2              | 1         | 1         | 3          | 15         | 1         | 1         |           | 11         |             | 2         | 2          |           |           |           | 2          |           | 10         | 51          |
| 105                           | Vegetable Snacks                     |           |           |                |           |           |            |            |           |           |           |            |             |           |            |           |           |           |            |           |            |             |
| 106                           | Wheat & Other Grain-Based Snacks     |           |           |                |           |           | 1          | 1          |           |           |           |            |             |           |            |           |           |           | 1          |           | 1          | 4           |
| 107                           | <b>Sports &amp; Energy Drinks</b>    | <b>4</b>  |           | <b>3</b>       |           | <b>3</b>  | <b>4</b>   | <b>19</b>  |           | <b>8</b>  | <b>3</b>  | <b>4</b>   |             | <b>5</b>  | <b>2</b>   | <b>8</b>  | <b>3</b>  | <b>1</b>  | <b>1</b>   | <b>4</b>  | <b>27</b>  | <b>99</b>   |
| 108                           | Energy Drinks                        | 4         |           | 3              |           | 3         | 2          | 17         |           | 7         | 2         | 2          | 4           | 1         | 7          | 3         | 1         | 1         | 4          |           | 23         | 84          |
| 109                           | Sports Drinks                        |           |           |                |           |           | 2          | 2          |           | 1         | 1         | 2          | 1           | 1         | 1          |           |           |           |            |           | 4          | 15          |
| 110                           | <b>Sugar &amp; Gum Confectionery</b> | <b>19</b> |           | <b>23</b>      | <b>4</b>  | <b>21</b> | <b>60</b>  | <b>227</b> | <b>3</b>  | <b>18</b> | <b>16</b> | <b>31</b>  | <b>52</b>   | <b>23</b> | <b>37</b>  | <b>18</b> | <b>1</b>  | <b>5</b>  | <b>35</b>  | <b>4</b>  | <b>229</b> | <b>826</b>  |
| 111                           | Boiled Sweets                        |           |           |                |           | 1         | 2          | 14         |           | 2         | 1         | 2          | 1           |           | 6          | 2         |           |           | 4          |           | 12         | 47          |
| 112                           | Gum                                  |           |           |                |           |           | 1          |            |           |           |           | 1          |             |           |            |           |           |           |            |           |            | 2           |
| 113                           | Liquorice                            |           |           |                |           |           |            | 3          |           |           |           |            | 1           | 2         |            |           |           |           | 1          |           | 13         | 20          |
| 114                           | Lollipops                            | 1         |           | 1              |           |           |            | 4          |           |           |           |            | 1           |           |            |           |           |           | 1          |           | 3          | 11          |
| 115                           | Marshmallows                         |           |           |                |           |           |            | 2          |           |           |           |            |             | 1         | 1          |           |           |           |            |           |            | 4           |
| 116                           | Medicated Confectionery              | 2         |           | 1              |           |           |            | 11         | 1         |           |           | 2          | 1           | 1         | 1          | 1         |           |           | 3          |           | 8          | 32          |
| 117                           | Mixed Assortments                    | 1         |           |                |           | 6         | 5          | 16         |           |           |           | 1          | 8           | 1         |            |           |           |           | 3          |           | 6          | 47          |
| 118                           | Other Sugar Confectionery            |           |           |                |           |           | 3          | 3          |           |           |           | 2          | 2           |           |            |           | 1         |           |            |           |            | 11          |
| 119                           | Pastilles, Gums, Jellies & Chews     | 15        |           | 20             | 4         | 14        | 49         | 174        | 2         | 16        | 15        | 23         | 38          | 17        | 29         | 14        |           | 5         | 23         | 4         | 185        | 647         |
| 120                           | Standard & Power Mints               |           |           |                |           |           |            |            |           |           |           |            |             | 1         |            |           |           |           |            |           |            | 1           |
| 121                           | Sticks, Liquids & Sprays             |           |           |                |           |           |            |            |           |           |           |            |             |           |            | 1         |           |           |            |           |            | 1           |
| 122                           | Toffees, Caramels & Nougat           |           |           | 1              |           |           |            |            |           |           |           |            |             |           |            |           |           |           |            |           | 2          | 3           |
| 123                           | <b>Sweet Spreads</b>                 |           |           | <b>3</b>       |           |           |            | <b>11</b>  |           |           |           | <b>1</b>   | <b>1</b>    |           | <b>7</b>   |           |           |           | <b>2</b>   |           | <b>3</b>   | <b>28</b>   |
| 124                           | Chocolate Spreads                    |           |           |                |           |           |            |            |           |           |           |            |             |           |            |           |           |           |            |           |            |             |
| 125                           | Confiture & Fruit Spreads            |           |           | 3              |           |           |            | 9          |           |           |           | 1          | 1           |           | 7          |           |           |           | 2          |           | 3          | 26          |
| 126                           | Honey                                |           |           |                |           |           |            | 2          |           |           |           |            |             |           |            |           |           |           |            |           |            | 2           |
| 127                           | <b>Sweeteners &amp; Sugar</b>        |           |           |                |           |           | <b>1</b>   |            |           |           |           |            |             |           |            |           |           |           |            |           |            | <b>1</b>    |
| 128                           | Sucrose                              |           |           |                |           |           | 1          |            |           |           |           |            |             |           |            |           |           |           |            |           |            | 1           |
| 129                           | <b>Water</b>                         |           |           |                |           |           | <b>4</b>   | <b>3</b>   |           |           |           | <b>1</b>   |             | <b>1</b>  | <b>4</b>   |           | <b>1</b>  |           |            |           | <b>5</b>   | <b>19</b>   |
| 130                           | Flavoured Water                      |           |           |                |           |           | 4          | 3          |           |           |           | 1          |             | 1         | 4          |           | 1         |           |            |           | 5          | 19          |
| <b>Total (sub-categories)</b> |                                      | <b>86</b> | <b>12</b> | <b>107</b>     | <b>27</b> | <b>99</b> | <b>412</b> | <b>733</b> | <b>24</b> | <b>80</b> | <b>74</b> | <b>173</b> | <b>143</b>  | <b>78</b> | <b>234</b> | <b>48</b> | <b>10</b> | <b>14</b> | <b>146</b> | <b>29</b> | <b>611</b> | <b>3134</b> |

Supplementary B3. Total product releases per category / subcategory

| Number | Categories                               | Belgium    | Croatia    | Czech Republic | Denmark    | Finland     | France      | Germany     | Greece      | Hungary     | Ireland    | Italy       | Netherlands | Norway     | Poland      | Portugal    | Romania   | Slovakia  | Spain       | Sweden     | UK          | Grand total  |
|--------|------------------------------------------|------------|------------|----------------|------------|-------------|-------------|-------------|-------------|-------------|------------|-------------|-------------|------------|-------------|-------------|-----------|-----------|-------------|------------|-------------|--------------|
| 1      | <b>Alcoholic Beverages</b>               | <b>377</b> | <b>38</b>  | <b>247</b>     | <b>334</b> | <b>905</b>  | <b>2447</b> | <b>3187</b> | <b>275</b>  | <b>330</b>  | <b>29</b>  | <b>902</b>  | <b>502</b>  | <b>424</b> | <b>710</b>  | <b>160</b>  | <b>17</b> | <b>27</b> | <b>1531</b> | <b>350</b> | <b>1584</b> | <b>14376</b> |
| 2      | Beer                                     | 163        | 27         | 194            | 209        | 582         | 804         | 579         | 178         | 258         | 7          | 489         | 331         | 368        | 545         | 70          | 15        | 24        | 508         | 278        | 583         | 6212         |
| 3      | Cider                                    | 10         |            | 23             | 22         | 159         | 113         | 59          | 5           | 44          | 5          | 3           | 13          | 29         | 28          | 9           |           | 3         | 48          | 26         | 189         | 788          |
| 4      | Flavoured Alcoholic Beverages            | 134        |            | 20             | 37         | 97          | 241         | 533         | 34          | 24          | 14         | 57          | 79          | 13         | 42          | 35          | 2         |           | 111         | 10         | 217         | 1700         |
| 5      | Fortified & Other Wines                  | 8          | 1          | 1              | 17         | 26          | 90          | 112         | 1           | 1           |            | 10          | 3           | 1          |             |             |           |           | 49          | 4          | 34          | 358          |
| 6      | Liqueur                                  | 46         | 9          | 9              | 19         | 27          | 342         | 402         | 49          | 1           | 1          | 86          | 56          | 5          | 39          | 33          |           |           | 136         | 22         | 102         | 1384         |
| 7      | Vodka                                    | 16         | 1          |                | 29         | 14          | 147         | 40          | 8           | 2           | 2          | 14          | 20          | 8          | 56          | 13          |           |           | 26          | 10         | 80          | 486          |
| 8      | Wine                                     |            |            |                | 1          |             | 710         | 1462        |             |             |            | 243         |             |            |             |             |           |           | 653         |            | 379         | 3448         |
| 9      | <b>Baby Food</b>                         | <b>169</b> | <b>1</b>   | <b>103</b>     | <b>61</b>  | <b>86</b>   | <b>582</b>  | <b>557</b>  | <b>56</b>   | <b>87</b>   | <b>96</b>  | <b>273</b>  | <b>229</b>  | <b>168</b> | <b>259</b>  | <b>62</b>   | <b>3</b>  | <b>11</b> | <b>419</b>  | <b>34</b>  | <b>640</b>  | <b>3896</b>  |
| 10     | Baby Cereals                             | 10         |            | 8              | 19         | 29          | 60          | 114         | 34          | 9           | 15         | 27          | 23          | 39         | 50          | 14          | 2         |           | 76          | 9          | 71          | 609          |
| 11     | Baby Fruit Products, Desserts & Yogurts  | 45         | 1          | 47             | 25         | 37          | 181         | 191         | 12          | 37          | 19         | 113         | 53          | 57         | 95          | 29          |           | 2         | 186         | 8          | 164         | 1302         |
| 12     | Baby Juices & Drinks                     | 6          |            | 25             | 2          | 8           | 38          | 70          |             | 14          | 3          | 38          | 29          | 11         | 35          | 3           | 1         | 1         | 13          | 7          | 37          | 341          |
| 13     | Baby Savoury Meals & Dishes              | 100        |            | 21             | 14         | 9           | 303         | 163         |             | 20          | 46         | 91          | 113         | 47         | 76          | 12          |           | 8         | 134         | 5          | 282         | 1444         |
| 14     | Baby Snacks                              | 8          |            | 2              | 1          | 3           |             | 19          | 10          | 7           | 13         | 4           | 11          | 14         | 3           | 4           |           |           | 10          | 5          | 86          | 200          |
| 15     | <b>Bakery</b>                            | <b>951</b> | <b>90</b>  | <b>1302</b>    | <b>633</b> | <b>1286</b> | <b>6643</b> | <b>7400</b> | <b>1074</b> | <b>1144</b> | <b>892</b> | <b>6579</b> | <b>1687</b> | <b>813</b> | <b>1239</b> | <b>1359</b> | <b>84</b> | <b>97</b> | <b>5407</b> | <b>781</b> | <b>7534</b> | <b>46995</b> |
| 16     | Baking Ingredients & Mixes               | 141        | 15         | 306            | 208        | 214         | 1151        | 1439        | 120         | 96          | 92         | 815         | 321         | 242        | 272         | 174         | 14        | 17        | 916         | 79         | 1266        | 7898         |
| 17     | Bread & Bread Products                   | 164        | 8          | 128            | 181        | 426         | 1021        | 1423        | 284         | 149         | 247        | 1275        | 266         | 179        | 142         | 173         | 6         | 11        | 1062        | 288        | 1416        | 8849         |
| 18     | Cakes, Pastries & Sweet Goods            | 185        | 25         | 284            | 77         | 264         | 1799        | 1473        | 206         | 179         | 262        | 1700        | 352         | 81         | 165         | 233         | 19        | 17        | 1358        | 111        | 2408        | 11198        |
| 19     | Savoury Biscuits/Crackers                | 112        | 3          | 122            | 59         | 138         | 423         | 562         | 92          | 108         | 92         | 746         | 242         | 125        | 123         | 132         | 5         | 27        | 298         | 122        | 524         | 4055         |
| 20     | Sweet Biscuits/Cookies                   | 349        | 39         | 462            | 108        | 244         | 2249        | 2503        | 372         | 612         | 199        | 2043        | 506         | 186        | 537         | 647         | 40        | 25        | 1773        | 181        | 1920        | 14995        |
| 21     | <b>Breakfast Cereals</b>                 | <b>146</b> | <b>15</b>  | <b>299</b>     | <b>104</b> | <b>265</b>  | <b>749</b>  | <b>874</b>  | <b>172</b>  | <b>52</b>   | <b>162</b> | <b>402</b>  | <b>225</b>  | <b>198</b> | <b>338</b>  | <b>248</b>  | <b>10</b> | <b>26</b> | <b>522</b>  | <b>142</b> | <b>1214</b> | <b>6163</b>  |
| 22     | Cold Cereals                             | 139        | 15         | 232            | 88         | 185         | 714         | 766         | 160         | 45          | 128        | 400         | 191         | 156        | 269         | 227         | 10        | 17        | 505         | 124        | 892         | 5263         |
| 23     | Hot Cereals                              | 7          |            | 67             | 16         | 80          | 35          | 108         | 12          | 7           | 34         | 2           | 34          | 42         | 69          | 21          |           | 9         | 17          | 18         | 322         | 900          |
| 24     | <b>Carbonated Soft Drinks</b>            | <b>105</b> | <b>23</b>  | <b>124</b>     | <b>78</b>  | <b>126</b>  | <b>640</b>  | <b>901</b>  | <b>105</b>  | <b>141</b>  | <b>79</b>  | <b>353</b>  | <b>242</b>  | <b>93</b>  | <b>170</b>  | <b>96</b>   | <b>16</b> | <b>8</b>  | <b>379</b>  | <b>57</b>  | <b>660</b>  | <b>4396</b>  |
|        | Carbonated Soft Drinks                   | 105        | 23         | 124            | 78         | 126         | 640         | 901         | 105         | 141         | 79         | 353         | 242         | 93         | 170         | 96          | 16        | 8         | 379         | 57         | 660         | 4396         |
| 25     | <b>Chocolate Confectionery</b>           | <b>623</b> | <b>61</b>  | <b>673</b>     | <b>303</b> | <b>744</b>  | <b>2560</b> | <b>5295</b> | <b>281</b>  | <b>437</b>  | <b>199</b> | <b>1873</b> | <b>800</b>  | <b>529</b> | <b>926</b>  | <b>613</b>  | <b>92</b> | <b>32</b> | <b>1624</b> | <b>275</b> | <b>2942</b> | <b>20882</b> |
| 26     | Chocolate Countlines                     | 65         | 8          | 80             | 14         | 58          | 186         | 422         | 49          | 131         | 35         | 145         | 101         | 51         | 111         | 51          | 8         | 5         | 99          | 26         | 367         | 2012         |
| 27     | Chocolate Tablets                        | 221        | 38         | 230            | 100        | 399         | 939         | 1312        | 142         | 149         | 60         | 690         | 267         | 244        | 369         | 255         | 28        | 15        | 688         | 165        | 747         | 7058         |
| 28     | Individually Wrapped Chocolate Pieces    | 73         | 2          | 64             | 33         | 52          | 198         | 580         | 32          | 18          | 17         | 390         | 44          | 30         | 104         | 84          | 6         | 2         | 201         | 15         | 203         | 2148         |
| 29     | Non-Individually Wrapped Chocolate Piece | 140        | 10         | 218            | 84         | 191         | 454         | 1372        | 50          | 88          | 64         | 295         | 164         | 120        | 207         | 158         | 11        | 4         | 414         | 61         | 525         | 4630         |
| 30     | Other Chocolate Confectionery            | 17         |            | 9              | 16         | 3           | 28          | 74          |             | 3           | 1          | 14          | 14          | 10         | 13          | 10          |           | 1         | 23          |            | 39          | 275          |
| 31     | Seasonal Chocolate                       | 107        | 3          | 72             | 56         | 41          | 755         | 1535        | 8           | 48          | 22         | 339         | 210         | 74         | 122         | 55          | 39        | 5         | 199         | 8          | 1061        | 4759         |
| 32     | <b>Dairy</b>                             | <b>742</b> | <b>118</b> | <b>941</b>     | <b>632</b> | <b>1175</b> | <b>3910</b> | <b>5728</b> | <b>798</b>  | <b>1416</b> | <b>507</b> | <b>3225</b> | <b>1211</b> | <b>637</b> | <b>1859</b> | <b>629</b>  | <b>99</b> | <b>74</b> | <b>3044</b> | <b>659</b> | <b>3577</b> | <b>30981</b> |
| 33     | Cream                                    | 30         | 5          | 50             | 45         | 85          | 192         | 197         | 40          | 71          | 12         | 155         | 57          | 35         | 56          | 14          | 2         | 2         | 99          | 52         | 225         | 1424         |
| 34     | Curd & Quark                             | 1          | 1          | 42             | 14         | 49          | 44          | 139         | 5           | 62          | 5          | 144         | 21          | 14         | 138         | 6           | 1         |           | 37          | 13         | 92          | 828          |
| 35     | Drinking Yogurt & Liquid Cultured Milk   | 54         | 27         | 117            | 51         | 154         | 283         | 317         | 17          | 173         | 65         | 199         | 206         | 69         | 295         | 123         | 15        | 8         | 286         | 104        | 283         | 2846         |
| 36     | Flavoured Milk                           | 25         | 2          | 48             | 44         | 13          | 77          | 260         | 30          | 89          | 12         | 30          | 69          | 45         | 59          | 28          | 1         |           | 138         | 26         | 232         | 1228         |
| 37     | Fresh Cheese & Cream Cheese              | 78         | 11         | 71             | 40         | 75          | 320         | 539         | 46          | 57          | 13         | 303         | 80          | 40         | 105         | 53          | 12        |           | 309         | 40         | 113         | 2305         |
| 38     | Hard Cheese & Semi-Hard Cheese           | 98         | 24         | 132            | 195        | 273         | 605         | 1037        | 240         | 177         | 91         | 477         | 215         | 72         | 279         | 92          | 17        |           | 519         | 139        | 821         | 5503         |
| 39     | Liquid Dairy Other                       | 1          |            | 11             |            | 1           | 1           | 53          |             | 6           |            | 1           | 2           |            | 1           | 1           |           |           | 2           |            | 5           | 85           |
| 40     | Processed Cheese                         | 44         | 3          | 61             | 29         | 44          | 209         | 279         | 41          | 117         | 19         | 239         | 85          | 48         | 137         | 28          | 17        |           | 261         | 15         | 194         | 1870         |
| 41     | Soft Cheese & Semi-Soft Cheese           | 90         | 13         | 142            | 123        | 100         | 794         | 836         | 168         | 127         | 31         | 784         | 138         | 70         | 238         | 55          | 7         | 1         | 394         | 85         | 335         | 4531         |
| 42     | Soft Cheese Desserts                     | 40         | 3          | 45             | 5          | 121         | 192         | 273         | 3           | 121         | 3          | 40          | 59          | 21         | 132         | 22          | 1         | 8         | 79          | 25         | 93          | 1286         |
| 43     | Soy Based Drinks                         | 19         |            | 26             | 10         | 15          | 73          | 80          | 5           | 23          | 4          | 58          | 28          | 9          | 10          | 53          | 3         | 1         | 118         | 6          | 97          | 638          |
| 44     | Soy Yogurt                               | 18         |            | 9              | 3          | 21          | 62          | 30          | 1           | 4           | 3          | 18          | 11          | 5          | 1           | 17          |           |           | 50          | 8          | 38          | 299          |
| 45     | Spoonable Yogurt                         | 244        | 29         | 187            | 73         | 224         | 1058        | 1688        | 202         | 389         | 249        | 777         | 240         | 209        | 408         | 137         | 23        | 54        | 752         | 146        | 1049        | 8138         |
| 46     | <b>Desserts &amp; Ice Cream</b>          | <b>547</b> | <b>59</b>  | <b>435</b>     | <b>256</b> | <b>591</b>  | <b>3446</b> | <b>3026</b> | <b>365</b>  | <b>249</b>  | <b>339</b> | <b>1621</b> | <b>793</b>  | <b>408</b> | <b>655</b>  | <b>290</b>  | <b>21</b> | <b>27</b> | <b>1978</b> | <b>329</b> | <b>2848</b> | <b>18283</b> |
| 47     | Chilled Desserts                         | 125        | 14         | 113            | 34         | 117         | 1149        | 934         | 58          | 193         | 146        | 346         | 322         | 45         | 227         | 70          | 4         | 9         | 642         | 66         | 954         | 5568         |
| 48     | Dairy-Based Frozen Products              | 238        | 32         | 139            | 116        | 319         | 1001        | 1026        | 199         | 7           | 104        | 799         | 268         | 221        | 176         | 66          | 4         |           | 806         | 182        | 840         | 6543         |
| 49     | Dessert Toppings                         | 51         | 3          | 7              | 12         | 27          | 98          | 119         | 5           | 2           | 16         | 15          | 14          | 23         | 16          | 23          |           |           | 46          | 10         | 87          | 574          |
| 50     | Other Frozen Desserts                    | 38         | 6          | 63             | 45         | 45          | 257         | 338         | 43          | 1           | 40         | 125         | 52          | 31         | 10          | 14          | 1         | 1         | 109         | 32         | 365         | 1616         |

Supplementary B3. Total product releases per category / subcategory

| Number | Categories                                     | Belgium    | Croatia   | Czech Republic | Denmark     | Finland    | France      | Germany     | Greece     | Hungary    | Ireland    | Italy       | Netherlands | Norway     | Poland      | Portugal   | Romania   | Slovakia   | Spain       | Sweden     | UK          | Grand total  |
|--------|------------------------------------------------|------------|-----------|----------------|-------------|------------|-------------|-------------|------------|------------|------------|-------------|-------------|------------|-------------|------------|-----------|------------|-------------|------------|-------------|--------------|
| 51     | Shelf-Stable Desserts                          | 49         | 4         | 102            | 33          | 38         | 662         | 465         | 51         | 45         | 21         | 231         | 75          | 54         | 202         | 115        | 12        | 15         | 256         | 24         | 478         | 2932         |
| 52     | Soy-Based Frozen Products                      | 3          |           |                | 5           | 5          | 6           | 15          | 1          |            |            | 19          |             | 4          |             |            |           |            | 11          | 1          | 2           | 72           |
| 53     | Water-Based Frozen Desserts                    | 43         |           | 11             | 11          | 40         | 273         | 129         | 8          | 1          | 12         | 86          | 62          | 30         | 24          | 2          |           | 2          | 108         | 14         | 122         | 978          |
| 54     | <b>Fruit &amp; Vegetables</b>                  | <b>213</b> | <b>19</b> | <b>343</b>     | <b>150</b>  | <b>205</b> | <b>1687</b> | <b>1467</b> | <b>346</b> | <b>27</b>  | <b>227</b> | <b>1945</b> | <b>386</b>  | <b>168</b> | <b>521</b>  | <b>201</b> | <b>11</b> | <b>36</b>  | <b>1447</b> | <b>231</b> | <b>1756</b> | <b>11386</b> |
| 55     | Fruit                                          | 45         | 1         | 94             | 47          | 82         | 321         | 355         | 62         | 4          | 81         | 185         | 85          | 36         | 111         | 68         | 1         | 7          | 225         | 37         | 492         | 2339         |
| 56     | Vegetables                                     | 168        | 18        | 249            | 103         | 123        | 1366        | 1112        | 284        | 23         | 146        | 1760        | 301         | 132        | 410         | 133        | 10        | 29         | 1222        | 194        | 1264        | 9047         |
| 57     | <b>Hot Beverages</b>                           | <b>173</b> | <b>11</b> | <b>441</b>     | <b>132</b>  | <b>272</b> | <b>1288</b> | <b>1467</b> | <b>64</b>  | <b>395</b> | <b>54</b>  | <b>396</b>  | <b>322</b>  | <b>197</b> | <b>558</b>  | <b>170</b> | <b>14</b> | <b>24</b>  | <b>622</b>  | <b>151</b> | <b>933</b>  | <b>7684</b>  |
| 58     | Tea                                            | 173        | 11        | 441            | 132         | 272        | 1288        | 1467        | 64         | 395        | 54         | 396         | 322         | 197        | 558         | 170        | 14        | 24         | 622         | 151        | 933         | 7684         |
| 59     | <b>Juice Drinks</b>                            | <b>304</b> | <b>15</b> | <b>499</b>     | <b>236</b>  | <b>407</b> | <b>2191</b> | <b>1743</b> | <b>201</b> | <b>314</b> | <b>389</b> | <b>897</b>  | <b>689</b>  | <b>370</b> | <b>727</b>  | <b>302</b> | <b>15</b> | <b>32</b>  | <b>1133</b> | <b>259</b> | <b>1740</b> | <b>12463</b> |
| 60     | Fruit/Flavoured Still Drinks                   | 81         | 1         | 107            | 30          | 59         | 334         | 204         | 26         | 123        | 78         | 116         | 159         | 35         | 306         | 82         | 7         | 7          | 281         | 51         | 411         | 2498         |
| 61     | Juice                                          | 166        | 11        | 285            | 171         | 256        | 1315        | 1108        | 119        | 100        | 234        | 327         | 298         | 285        | 214         | 109        | 4         | 21         | 433         | 158        | 916         | 6530         |
| 62     | Nectars                                        | 57         | 3         | 107            | 35          | 92         | 542         | 431         | 56         | 91         | 77         | 454         | 232         | 50         | 207         | 111        | 4         | 4          | 419         | 50         | 413         | 3435         |
| 63     | <b>Meals &amp; Meal Centers</b>                | <b>603</b> | <b>44</b> | <b>306</b>     | <b>163</b>  | <b>441</b> | <b>4073</b> | <b>3060</b> | <b>249</b> | <b>46</b>  | <b>908</b> | <b>1366</b> | <b>1009</b> | <b>357</b> | <b>518</b>  | <b>296</b> | <b>16</b> | <b>30</b>  | <b>2063</b> | <b>367</b> | <b>4964</b> | <b>20879</b> |
| 64     | Instant Noodles                                | 21         | 8         | 54             | 11          | 9          | 51          | 150         | 14         | 29         | 6          | 14          | 46          | 8          | 42          | 30         | 2         | 7          | 96          | 8          | 317         | 923          |
| 65     | Meal Kits                                      | 57         | 8         | 18             | 14          | 33         | 279         | 247         | 21         | 4          | 75         | 47          | 192         | 50         | 53          | 13         | 1         | 1          | 196         | 23         | 375         | 1707         |
| 66     | Pizzas                                         | 99         | 10        | 61             | 56          | 56         | 531         | 440         | 85         |            | 177        | 453         | 164         | 80         | 162         | 90         | 4         | 3          | 478         | 98         | 718         | 3765         |
| 67     | Prepared Meals                                 | 334        | 14        | 106            | 47          | 210        | 2236        | 1310        | 69         | 4          | 511        | 551         | 368         | 191        | 157         | 134        | 7         | 16         | 878         | 178        | 2669        | 9990         |
| 68     | Salads                                         | 51         | 1         | 52             | 31          | 50         | 398         | 637         | 36         | 9          | 72         | 137         | 115         | 15         | 78          | 15         | 2         |            | 212         | 27         | 303         | 2241         |
| 69     | Sandwiches/Wraps                               | 41         | 3         | 15             | 4           | 83         | 578         | 276         | 24         |            | 67         | 164         | 124         | 13         | 26          | 14         |           | 3          | 203         | 33         | 582         | 2253         |
| 70     | <b>Other Beverages</b>                         | <b>96</b>  | <b>6</b>  | <b>181</b>     | <b>69</b>   | <b>132</b> | <b>736</b>  | <b>501</b>  | <b>17</b>  | <b>121</b> | <b>47</b>  | <b>156</b>  | <b>228</b>  | <b>102</b> | <b>151</b>  | <b>108</b> | <b>7</b>  | <b>4</b>   | <b>242</b>  | <b>76</b>  | <b>647</b>  | <b>3627</b>  |
| 71     | Beverage Concentrates                          | 63         | 5         | 96             | 45          | 40         | 553         | 180         | 5          | 38         | 44         | 62          | 125         | 62         | 111         | 51         | 3         |            | 65          | 39         | 353         | 1940         |
| 72     | Beverage Mixes                                 | 6          | 1         | 76             | 5           | 26         | 86          | 146         | 10         | 80         |            | 59          | 8           | 17         | 26          | 43         | 4         | 2          | 131         | 7          | 57          | 790          |
| 73     | Meal Replacements & Other Drinks               | 27         |           | 9              | 19          | 66         | 97          | 175         | 2          | 3          | 3          | 35          | 95          | 23         | 14          | 14         |           | 2          | 46          | 30         | 237         | 897          |
| 74     | <b>Processed Fish, Meat &amp; Egg Products</b> | <b>407</b> | <b>97</b> | <b>615</b>     | <b>1150</b> | <b>598</b> | <b>4791</b> | <b>5343</b> | <b>506</b> | <b>191</b> | <b>817</b> | <b>3229</b> | <b>1276</b> | <b>672</b> | <b>777</b>  | <b>356</b> | <b>45</b> | <b>21</b>  | <b>3259</b> | <b>854</b> | <b>4426</b> | <b>29430</b> |
| 75     | Fish Products                                  | 177        | 27        | 230            | 326         | 111        | 1872        | 1513        | 159        | 51         | 225        | 1516        | 347         | 176        | 329         | 161        | 12        | 6          | 1406        | 122        | 1343        | 10109        |
| 76     | Meat Products                                  | 125        | 61        | 248            | 662         | 266        | 1796        | 2706        | 228        | 86         | 346        | 1082        | 645         | 378        | 329         | 143        | 26        | 6          | 1239        | 565        | 1682        | 12619        |
| 77     | Meat Substitutes                               | 49         |           | 53             | 14          | 55         | 232         | 397         | 4          | 4          | 22         | 113         | 118         | 12         | 15          | 11         | 3         | 4          | 120         | 90         | 293         | 1609         |
| 78     | Poultry Products                               | 56         | 9         | 84             | 148         | 166        | 891         | 727         | 115        | 50         | 224        | 518         | 166         | 106        | 104         | 41         | 4         | 5          | 494         | 77         | 1108        | 5093         |
| 79     | <b>RTDs</b>                                    | <b>52</b>  | <b>1</b>  | <b>69</b>      | <b>18</b>   | <b>40</b>  | <b>163</b>  | <b>236</b>  | <b>55</b>  | <b>75</b>  | <b>0</b>   | <b>212</b>  | <b>67</b>   | <b>46</b>  | <b>91</b>   | <b>56</b>  | <b>3</b>  | <b>4</b>   | <b>78</b>   | <b>2</b>   | <b>63</b>   | <b>1331</b>  |
| 80     | RTD (Iced) Tea                                 | 52         | 1         | 69             | 18          | 40         | 163         | 236         | 55         | 75         |            | 212         | 67          | 46         | 91          | 56         | 3         | 4          | 78          | 2          | 63          | 1331         |
| 81     | <b>Sauces &amp; Seasonings</b>                 | <b>579</b> | <b>92</b> | <b>721</b>     | <b>312</b>  | <b>619</b> | <b>3394</b> | <b>6136</b> | <b>457</b> | <b>377</b> | <b>538</b> | <b>2639</b> | <b>1455</b> | <b>560</b> | <b>1577</b> | <b>734</b> | <b>34</b> | <b>185</b> | <b>3118</b> | <b>819</b> | <b>5362</b> | <b>29708</b> |
| 82     | Cooking Sauces                                 | 91         | 12        | 52             | 64          | 78         | 473         | 670         | 104        | 31         | 141        | 362         | 341         | 121        | 134         | 71         | 6         | 19         | 427         | 130        | 1127        | 4454         |
| 83     | Dressings & Vinegar                            | 79         | 4         | 32             | 33          | 123        | 395         | 788         | 55         | 17         | 36         | 210         | 114         | 52         | 98          | 111        | 1         |            | 362         | 46         | 494         | 3050         |
| 84     | Other Sauces & Seasonings                      | 13         |           | 21             | 6           | 16         | 140         | 141         | 14         | 12         | 12         | 93          | 32          | 14         | 31          | 28         | 2         | 5          | 114         | 7          | 145         | 846          |
| 85     | Pasta Sauces                                   | 59         | 9         | 38             | 32          | 45         | 358         | 630         | 47         | 9          | 114        | 640         | 134         | 52         | 140         | 47         | 2         | 2          | 229         | 73         | 734         | 3394         |
| 86     | Pickled Condiments                             | 33         | 14        | 117            | 36          | 28         | 627         | 1012        | 74         | 18         | 87         | 665         | 138         | 39         | 277         | 91         |           | 5          | 573         | 115        | 766         | 4715         |
| 87     | Seasonings                                     | 155        | 44        | 342            | 76          | 187        | 819         | 1669        | 85         | 244        | 96         | 457         | 437         | 174        | 552         | 265        | 13        | 128        | 798         | 197        | 1378        | 8116         |
| 88     | Table Sauces                                   | 149        | 9         | 119            | 65          | 142        | 582         | 1226        | 78         | 46         | 52         | 212         | 259         | 108        | 345         | 121        | 10        | 26         | 615         | 251        | 718         | 5133         |
| 89     | <b>Savoury Spreads</b>                         | <b>50</b>  | <b>21</b> | <b>132</b>     | <b>59</b>   | <b>24</b>  | <b>1036</b> | <b>925</b>  | <b>31</b>  | <b>46</b>  | <b>39</b>  | <b>149</b>  | <b>127</b>  | <b>72</b>  | <b>146</b>  | <b>90</b>  | <b>15</b> | <b>14</b>  | <b>636</b>  | <b>50</b>  | <b>329</b>  | <b>3991</b>  |
| 90     | Meat Pastes & Pates                            | 34         | 18        | 91             | 47          | 9          | 772         | 459         | 12         | 38         | 30         | 44          | 68          | 56         | 102         | 73         | 12        | 10         | 517         | 32         | 260         | 2684         |
| 91     | Savoury Vegetable Pastes/Spreads               | 16         | 3         | 41             | 12          | 15         | 264         | 466         | 19         | 8          | 9          | 105         | 59          | 16         | 44          | 17         | 3         | 4          | 119         | 18         | 69          | 1307         |
| 92     | <b>Side Dishes</b>                             | <b>177</b> | <b>12</b> | <b>263</b>     | <b>84</b>   | <b>211</b> | <b>1077</b> | <b>1209</b> | <b>122</b> | <b>21</b>  | <b>225</b> | <b>831</b>  | <b>364</b>  | <b>143</b> | <b>352</b>  | <b>125</b> | <b>7</b>  | <b>27</b>  | <b>576</b>  | <b>111</b> | <b>1557</b> | <b>7494</b>  |
| 93     | Potato Products                                | 95         | 5         | 66             | 29          | 103        | 364         | 539         | 44         | 2          | 124        | 306         | 191         | 81         | 74          | 21         | 2         | 5          | 188         | 51         | 566         | 2856         |
| 94     | Rice                                           | 67         | 5         | 127            | 44          | 59         | 405         | 399         | 62         | 14         | 48         | 339         | 114         | 38         | 104         | 92         | 5         | 15         | 318         | 30         | 530         | 2815         |
| 95     | Stuffing, Polenta & Other Side Dishes          | 15         | 2         | 70             | 11          | 49         | 308         | 271         | 16         | 5          | 53         | 186         | 59          | 24         | 174         | 12         |           | 7          | 70          | 30         | 461         | 1823         |
| 96     | <b>Snacks</b>                                  | <b>346</b> | <b>53</b> | <b>658</b>     | <b>363</b>  | <b>641</b> | <b>2421</b> | <b>3379</b> | <b>460</b> | <b>354</b> | <b>342</b> | <b>1666</b> | <b>967</b>  | <b>496</b> | <b>817</b>  | <b>416</b> | <b>34</b> | <b>68</b>  | <b>2266</b> | <b>320</b> | <b>4030</b> | <b>20097</b> |
| 97     | Corn-Based Snacks                              | 47         | 5         | 66             | 23          | 43         | 160         | 270         | 62         | 63         | 19         | 190         | 95          | 52         | 95          | 52         | 2         | 10         | 327         | 38         | 300         | 1919         |
| 98     | Fruit Snacks                                   | 23         | 13        | 74             | 61          | 146        | 316         | 504         | 42         | 23         | 26         | 194         | 121         | 51         | 132         | 60         | 1         | 1          | 254         | 36         | 528         | 2606         |
| 99     | Hors d'oeuvres/Canapes                         | 114        | 3         | 28             | 43          | 24         | 744         | 495         | 76         | 2          | 99         | 367         | 188         | 32         | 72          | 31         | 3         |            | 468         | 26         | 761         | 3576         |
| 100    | Nuts                                           | 20         | 4         | 114            | 96          | 75         | 430         | 646         | 107        | 33         | 39         | 361         | 178         | 105        | 194         | 78         | 10        | 15         | 454         | 65         | 581         | 3605         |
| 101    | Popcorn                                        | 17         | 1         | 21             | 11          | 8          | 75          | 114         | 18         | 9          | 10         | 51          | 28          | 26         | 40          | 10         | 4         | 13         | 126         | 8          | 279         | 869          |



Supplementary B3. Total product releases per category / subcategory

| Number                 | Categories                           | Belgium    | Croatia   | Czech Republic | Denmark    | Finland    | France      | Germany     | Greece     | Hungary    | Ireland    | Italy      | Netherlands | Norway     | Poland     | Portugal   | Romania   | Slovakia  | Spain       | Sweden     | UK          | Grand total  |
|------------------------|--------------------------------------|------------|-----------|----------------|------------|------------|-------------|-------------|------------|------------|------------|------------|-------------|------------|------------|------------|-----------|-----------|-------------|------------|-------------|--------------|
| 102                    | Rice Snacks                          | 11         | 1         | 13             | 4          | 3          | 31          | 66          | 12         | 10         | 3          | 43         | 37          | 5          | 13         | 7          |           | 3         | 33          | 4          | 91          | 390          |
| 103                    | Snack Mixes                          | 9          |           | 15             | 20         | 76         | 139         | 234         | 5          | 8          | 25         | 39         | 72          | 45         | 33         | 23         |           | 3         | 132         | 21         | 284         | 1183         |
| 104                    | Snack/Cereal/Energy Bars             | 71         | 12        | 239            | 82         | 203        | 367         | 667         | 97         | 137        | 79         | 232        | 172         | 149        | 117        | 93         | 9         | 18        | 301         | 90         | 808         | 3943         |
| 105                    | Vegetable Snacks                     | 7          | 2         | 24             | 8          | 23         | 47          | 64          | 2          | 2          | 10         | 21         | 25          | 8          | 8          | 13         |           |           | 53          | 19         | 88          | 424          |
| 106                    | Wheat & Other Grain-Based Snacks     | 27         | 12        | 64             | 15         | 40         | 112         | 319         | 39         | 67         | 32         | 168        | 51          | 23         | 113        | 49         | 5         | 5         | 118         | 13         | 310         | 1582         |
| <b>107</b>             | <b>Sports &amp; Energy Drinks</b>    | <b>65</b>  | <b>0</b>  | <b>107</b>     | <b>42</b>  | <b>93</b>  | <b>206</b>  | <b>327</b>  | <b>16</b>  | <b>154</b> | <b>23</b>  | <b>75</b>  | <b>160</b>  | <b>51</b>  | <b>157</b> | <b>45</b>  | <b>7</b>  | <b>8</b>  | <b>201</b>  | <b>29</b>  | <b>383</b>  | <b>2149</b>  |
| 108                    | Energy Drinks                        | 45         |           | 83             | 36         | 66         | 119         | 211         | 14         | 129        | 18         | 40         | 112         | 44         | 105        | 31         | 7         | 8         | 119         | 24         | 269         | 1480         |
| 109                    | Sports Drinks                        | 20         |           | 24             | 6          | 27         | 87          | 116         | 2          | 25         | 5          | 35         | 48          | 7          | 52         | 14         |           |           | 82          | 5          | 114         | 669          |
| <b>110</b>             | <b>Sugar &amp; Gum Confectionery</b> | <b>259</b> | <b>13</b> | <b>257</b>     | <b>169</b> | <b>407</b> | <b>1200</b> | <b>2403</b> | <b>169</b> | <b>262</b> | <b>111</b> | <b>821</b> | <b>776</b>  | <b>370</b> | <b>358</b> | <b>281</b> | <b>29</b> | <b>23</b> | <b>1443</b> | <b>136</b> | <b>1908</b> | <b>11395</b> |
| 111                    | Boiled Sweets                        | 11         | 2         | 23             | 6          | 11         | 81          | 213         | 7          | 52         | 11         | 93         | 38          | 10         | 43         | 30         | 2         | 2         | 77          | 4          | 173         | 889          |
| 112                    | Gum                                  | 63         | 1         | 27             | 33         | 54         | 140         | 266         | 64         | 32         | 7          | 71         | 125         | 64         | 26         | 72         | 5         |           | 161         | 34         | 111         | 1356         |
| 113                    | Liquorice                            |            |           | 4              | 47         | 114        | 34          | 93          |            | 1          | 2          | 61         | 135         | 68         |            | 10         |           | 1         | 35          | 16         | 78          | 699          |
| 114                    | Lollipops                            | 11         | 2         | 9              |            | 6          | 35          | 83          | 1          | 6          | 1          | 12         | 20          | 4          | 14         | 15         | 1         |           | 60          | 1          | 70          | 351          |
| 115                    | Marshmallows                         | 18         |           | 3              | 6          | 10         | 75          | 76          | 1          | 6          | 4          | 33         | 25          | 12         | 10         | 9          |           |           | 32          | 7          | 129         | 456          |
| 116                    | Medicated Confectionery              | 13         |           | 24             | 5          | 18         | 55          | 317         | 26         | 24         | 10         | 55         | 33          | 34         | 34         | 22         | 4         | 2         | 73          | 8          | 65          | 822          |
| 117                    | Mixed Assortments                    | 4          |           |                | 15         | 37         | 48          | 40          | 1          | 1          |            | 11         | 30          | 26         |            | 2          |           |           | 17          | 8          | 40          | 280          |
| 118                    | Other Sugar Confectionery            | 6          | 1         | 36             | 6          | 12         | 89          | 236         | 29         | 19         | 3          | 69         | 72          | 13         | 49         | 8          | 5         | 7         | 114         | 1          | 95          | 870          |
| 119                    | Pastilles, Gums, Jellies & Chews     | 78         | 4         | 76             | 29         | 105        | 407         | 722         | 27         | 81         | 58         | 171        | 191         | 93         | 110        | 60         | 8         | 11        | 217         | 42         | 751         | 3241         |
| 120                    | Standard & Power Mints               | 26         | 2         | 22             | 9          | 13         | 91          | 160         | 2          | 22         | 8          | 71         | 56          | 28         | 31         | 21         | 2         |           | 40          | 6          | 155         | 765          |
| 121                    | Sticks, Liquids & Sprays             | 1          |           | 1              | 1          |            | 4           | 13          |            | 1          |            | 1          | 11          | 6          | 2          | 1          |           |           | 1           |            | 50          | 93           |
| 122                    | Toffees, Caramels & Nougat           | 28         | 1         | 32             | 12         | 27         | 141         | 184         | 11         | 17         | 7          | 173        | 40          | 12         | 39         | 31         | 2         |           | 616         | 9          | 191         | 1573         |
| <b>123</b>             | <b>Sweet Spreads</b>                 | <b>146</b> | <b>9</b>  | <b>121</b>     | <b>94</b>  | <b>126</b> | <b>1006</b> | <b>1348</b> | <b>187</b> | <b>21</b>  | <b>87</b>  | <b>705</b> | <b>301</b>  | <b>201</b> | <b>260</b> | <b>180</b> | <b>3</b>  | <b>5</b>  | <b>783</b>  | <b>67</b>  | <b>817</b>  | <b>6467</b>  |
| 124                    | Chocolate Spreads                    | 46         | 2         | 19             | 8          | 10         | 148         | 131         | 28         | 6          | 10         | 116        | 99          | 14         | 34         | 26         | 2         | 1         | 110         | 2          | 91          | 903          |
| 125                    | Confiture & Fruit Spreads            | 70         | 6         | 71             | 72         | 55         | 604         | 928         | 91         | 12         | 52         | 406        | 142         | 163        | 206        | 135        |           | 1         | 526         | 50         | 494         | 4084         |
| 126                    | Honey                                | 30         | 1         | 31             | 14         | 61         | 254         | 289         | 68         | 3          | 25         | 183        | 60          | 24         | 20         | 19         | 1         | 3         | 147         | 15         | 232         | 1480         |
| <b>127</b>             | <b>Sweeteners &amp; Sugar</b>        | <b>27</b>  | <b>1</b>  | <b>53</b>      | <b>15</b>  | <b>12</b>  | <b>263</b>  | <b>140</b>  | <b>23</b>  | <b>3</b>   | <b>2</b>   | <b>116</b> | <b>23</b>   | <b>8</b>   | <b>49</b>  | <b>15</b>  | <b>2</b>  | <b>8</b>  | <b>92</b>   | <b>5</b>   | <b>83</b>   | <b>940</b>   |
| 128                    | Sucrose                              | 27         | 1         | 53             | 15         | 12         | 263         | 140         | 23         | 3          | 2          | 116        | 23          | 8          | 49         | 15         | 2         | 8         | 92          | 5          | 83          | 940          |
| <b>129</b>             | <b>Water</b>                         | <b>16</b>  | <b>0</b>  | <b>101</b>     | <b>32</b>  | <b>43</b>  | <b>115</b>  | <b>191</b>  | <b>6</b>   | <b>69</b>  | <b>23</b>  | <b>4</b>   | <b>78</b>   | <b>24</b>  | <b>118</b> | <b>8</b>   | <b>1</b>  | <b>6</b>  | <b>26</b>   | <b>50</b>  | <b>221</b>  | <b>1132</b>  |
| 130                    | Flavoured Water                      | 16         |           | 101            | 32         | 43         | 115         | 191         | 6          | 69         | 23         | 4          | 78          | 24         | 118        | 8          | 1         | 6         | 26          | 50         | 221         | 1132         |
| Total (sub-categories) |                                      | 7173       | 799       | 8991           | 5489       | 9449       | 46624       | 56843       | 6035       | 6332       | 6135       | 30435      | 13917       | 7107       | 13333      | 6840       | 585       | 797       | 32889       | 6154       | 50218       | 316145       |

| Number | Categories                                | Belgium | Croatia | Czech Republic | Denmark | Finland | France | Germany | Greece | Hungary | Ireland | Italy | Netherlands | Norway | Poland | Portugal | Romania | Slovakia | Spain | Sweden | UK  | Grand Total | Maximum |
|--------|-------------------------------------------|---------|---------|----------------|---------|---------|--------|---------|--------|---------|---------|-------|-------------|--------|--------|----------|---------|----------|-------|--------|-----|-------------|---------|
| 1      | Alcoholic Beverages                       | 1%      |         | 2%             | 2%      | 3%      | 1%     | 0%      | 1%     | 5%      |         |       | 0%          | 1%     | 1%     | 1%       |         |          | 0%    | 1%     | 0%  | 1%          | 5%      |
| 2      | Beer                                      |         |         | 2%             | 1%      | 0%      | 0%     | 0%      |        | 4%      |         |       | 0%          |        | 1%     |          |         |          | 0%    |        |     | 0%          | 4%      |
| 3      | Cider                                     |         |         | 13%            | 14%     | 10%     | 2%     | 2%      | 40%    | 7%      |         |       |             | 17%    |        | 22%      |         |          | 6%    | 8%     |     | 5%          | 40%     |
| 4      | Flavoured Alcoholic Beverages             | 1%      |         |                |         | 7%      | 1%     | 1%      | 3%     | 4%      |         |       | 1%          | 8%     | 2%     |          |         |          | 2%    | 10%    | 2%  | 2%          | 10%     |
| 5      | Fortified & Other Wines                   |         |         |                | 6%      |         |        |         |        |         |         |       |             |        |        |          |         |          |       |        |     | 0%          | 6%      |
| 6      | Liqueur                                   | 2%      |         |                |         |         |        |         |        |         |         |       |             |        |        |          |         |          | 1%    |        |     | 0%          | 2%      |
| 7      | Vodka                                     |         |         |                | 3%      |         | 3%     |         |        |         |         |       |             |        |        |          |         |          |       |        |     | 1%          | 3%      |
| 8      | Wine                                      |         |         |                |         |         | 0%     |         |        |         |         |       |             |        |        |          |         |          |       |        |     | 0%          | 0%      |
| 9      | Baby Food                                 |         | 100%    | 5%             |         |         |        | 0%      |        | 2%      |         |       |             |        | 1%     |          |         |          | 1%    |        | 0%  | 0%          | 100%    |
| 10     | Baby Cereals                              |         |         |                |         |         |        |         |        | 11%     |         |       |             |        |        |          |         |          |       |        |     | 0%          | 11%     |
| 11     | Baby Fruit Products, Desserts & Yogurts   |         | 100%    | 11%            |         |         |        |         |        | 3%      |         |       |             |        | 3%     |          |         |          | 2%    |        | 1%  | 1%          | 100%    |
| 12     | Baby Juices & Drinks                      |         |         |                |         |         |        |         |        |         |         |       |             |        |        |          |         |          | 8%    |        |     | 0%          | 8%      |
| 13     | Baby Savoury Meals & Dishes               |         |         |                |         |         |        |         |        |         |         |       |             |        |        |          |         |          |       |        | 0%  | 0%          | 0%      |
| 14     | Baby Snacks                               |         |         |                |         |         |        | 5%      |        |         |         |       |             |        |        |          |         |          |       |        | 1%  | 1%          | 5%      |
| 15     | Bakery                                    | 1%      |         | 1%             | 0%      | 1%      | 1%     | 1%      | 0%     | 0%      | 3%      | 0%    | 0%          | 1%     | 1%     | 1%       |         |          | 1%    | 1%     | 4%  | 1%          | 4%      |
| 16     | Baking Ingredients & Mixes                | 1%      |         |                | 0%      | 0%      | 1%     | 1%      |        | 0%      | 2%      |       | 1%          | 0%     | 1%     | 2%       |         |          | 1%    |        | 5%  | 2%          | 5%      |
| 17     | Bread & Bread Products                    |         |         |                |         |         |        |         |        | 0%      | 0%      |       |             |        |        |          |         |          |       |        | 0%  | 0%          | 0%      |
| 18     | Cakes, Pastries & Sweet Goods             | 2%      |         | 2%             | 1%      | 2%      | 2%     | 1%      | 0%     | 1%      | 8%      | 1%    | 1%          | 2%     | 5%     | 0%       |         |          | 1%    | 2%     | 8%  | 3%          | 8%      |
| 19     | Savoury Biscuits/Crackers                 |         |         |                |         |         | 0%     | 0%      |        |         |         |       |             |        |        |          |         |          |       |        |     | 0%          | 0%      |
| 20     | Sweet Biscuits/Cookies                    | 1%      |         | 0%             |         | 1%      | 1%     | 1%      |        | 0%      | 1%      | 0%    | 0%          | 1%     | 1%     | 1%       |         |          | 1%    | 2%     | 2%  | 1%          | 2%      |
| 21     | Breakfast Cereals                         | 1%      |         |                |         |         | 0%     |         | 1%     |         | 1%      | 0%    |             |        |        | 0%       |         |          | 0%    |        | 1%  | 0%          | 1%      |
| 22     | Cold Cereals                              | 1%      |         |                |         |         | 0%     |         | 1%     | 0%      |         | 0%    |             |        |        | 0%       |         |          | 0%    |        | 1%  | 0%          | 1%      |
| 23     | Hot Cereals                               |         |         |                |         |         |        |         | 0%     | 0%      | 3%      |       |             |        |        |          |         |          |       |        | 0%  | 0%          | 3%      |
| 24     | Carbonated Soft Drinks                    | 5%      | 4%      | 2%             | 9%      | 8%      | 7%     | 4%      | 1%     | 4%      | 10%     | 2%    | 3%          | 12%    | 7%     | 2%       | 13%     |          | 3%    | 12%    | 6%  | 5%          | 13%     |
|        | Carbonated Soft Drinks                    | 5%      | 4%      | 2%             | 9%      | 8%      | 7%     | 4%      | 1%     | 4%      | 10%     | 2%    | 3%          | 12%    | 7%     | 2%       | 13%     |          | 3%    | 12%    | 6%  | 5%          | 13%     |
| 25     | Chocolate Confectionery                   | 2%      | 2%      | 3%             | 2%      | 1%      | 3%     | 1%      | 1%     | 3%      | 3%      | 2%    | 3%          | 2%     | 3%     | 2%       | 2%      |          | 1%    |        | 3%  | 2%          | 3%      |
| 26     | Chocolate Countlines                      |         |         | 4%             |         |         | 1%     | 0%      |        |         |         |       | 0%          | 2%     | 1%     |          |         |          | 1%    |        | 1%  | 0%          | 4%      |
| 27     | Chocolate Tablets                         | 0%      | 3%      | 3%             |         | 1%      | 1%     | 1%      | 1%     | 5%      |         | 0%    | 1%          | 0%     | 4%     | 2%       |         |          | 1%    |        | 1%  | 1%          | 5%      |
| 28     | Individually Wrapped Chocolate Pieces     |         |         | 2%             |         |         | 1%     | 1%      |        |         |         |       | 2%          | 3%     | 4%     | 1%       |         |          | 1%    |        | 4%  | 1%          | 4%      |
| 29     | Non-Individually Wrapped Chocolate Pieces | 4%      |         | 3%             | 4%      | 2%      | 4%     | 2%      | 4%     | 5%      | 8%      | 8%    | 4%          | 3%     | 0%     | 6%       |         |          | 2%    |        | 6%  | 3%          | 8%      |
| 30     | Other Chocolate Confectionery             |         |         |                |         |         | 7%     |         |        |         |         |       |             |        |        |          |         |          |       |        |     | 1%          | 7%      |
| 31     | Seasonal Chocolate                        | 5%      |         | 4%             | 5%      | 2%      | 5%     | 1%      | 0%     | 2%      | 5%      | 1%    | 4%          | 3%     | 6%     | 2%       | 5%      |          | 2%    |        | 5%  | 3%          | 6%      |
| 32     | Dairy                                     | 4%      | 3%      | 2%             | 0%      | 2%      | 4%     | 1%      | 0%     | 2%      | 8%      | 1%    | 1%          | 1%     | 3%     | 2%       | 3%      | 15%      | 2%    | 1%     | 4%  | 2%          | 15%     |
| 33     | Cream                                     |         |         |                |         |         |        |         |        |         | 8%      |       |             |        |        |          |         |          |       |        | 1%  | 0%          | 8%      |
| 34     | Curd & Quark                              |         |         |                |         |         |        | 1%      |        |         |         |       |             | 7%     |        |          |         |          |       |        |     | 0%          | 7%      |
| 35     | Drinking Yogurt & Liquid Cultured Milk    | 9%      | 15%     | 9%             | 0%      | 3%      | 7%     | 3%      |        | 4%      | 11%     | 5%    | 2%          | 1%     | 9%     | 7%       | 13%     | 25%      | 6%    | 4%     | 9%  | 6%          | 25%     |
| 36     | Flavoured Milk                            |         |         |                |         |         |        |         |        |         |         |       | 1%          |        |        |          |         |          | 1%    |        | 1%  | 0%          | 1%      |
| 37     | Fresh Cheese & Cream Cheese               |         |         |                |         |         |        |         |        |         |         |       |             |        | 1%     |          |         |          |       |        | 1%  | 0%          | 1%      |
| 38     | Hard Cheese & Semi-Hard Cheese            |         |         |                |         |         |        |         |        |         |         |       |             |        |        |          |         |          |       |        | 1%  |             | 0%      |
| 39     | Liquid Dairy Other                        |         |         |                |         |         |        | 8%      |        |         |         |       |             |        |        |          |         |          |       |        |     | 5%          | 8%      |
| 40     | Processed Cheese                          |         |         |                |         |         | 0%     |         |        |         |         |       |             |        |        |          |         |          |       |        |     | 0%          | 0%      |
| 41     | Soft Cheese & Semi-Soft Cheese            |         |         |                |         |         |        |         |        |         |         |       |             |        |        |          |         |          |       |        |     |             | 0%      |
| 42     | Soft Cheese Desserts                      | 10%     |         | 7%             | 40%     | 8%      | 15%    | 4%      |        | 3%      |         | 3%    | 5%          | 5%     | 5%     |          |         | 13%      | 4%    | 12%    |     | 8%          | 40%     |
| 43     | Soy Based Drinks                          |         |         |                |         |         |        |         |        |         |         |       |             |        |        |          |         |          |       |        | 1%  | 0%          | 1%      |
| 44     | Soy Yogurt                                |         |         |                |         | 5%      | 3%     |         |        |         |         | 17%   |             |        |        | 6%       |         |          | 2%    |        | 11% | 4%          | 17%     |
| 45     | Spoonable Yogurt                          | 7%      |         | 4%             | 1%      | 4%      | 9%     | 3%      | 1%     | 5%      | 12%     | 4%    | 4%          | 3%     | 7%     | 4%       | 4%      | 15%      | 4%    | 1%     | 8%  | 5%          | 15%     |
| 46     | Desserts & Ice Cream                      | 3%      | 5%      | 2%             | 2%      | 4%      | 3%     | 2%      | 3%     | 1%      | 5%      | 3%    | 2%          | 5%     | 6%     | 5%       |         |          | 2%    | 1%     | 7%  | 3%          | 7%      |
| 47     | Chilled Desserts                          |         |         | 2%             | 3%      |         | 2%     | 1%      | 2%     | 1%      | 4%      | 1%    | 1%          |        | 4%     |          |         |          | 1%    |        | 7%  | 2%          | 7%      |
| 48     | Dairy-Based Frozen Products               | 4%      | 9%      | 1%             | 1%      | 4%      | 5%     | 3%      | 3%     |         | 3%      | 5%    | 4%          | 3%     | 3%     | 2%       |         |          | 2%    | 1%     | 6%  | 4%          | 9%      |
| 49     | Dessert Toppings                          |         |         |                |         | 4%      |        | 2%      |        |         | 6%      | 13%   |             |        |        | 4%       |         |          | 2%    |        | 1%  | 2%          | 13%     |
| 50     | Other Frozen Desserts                     | 5%      |         | 6%             |         |         | 1%     | 2%      | 2%     |         | 5%      | 1%    | 2%          | 3%     |        |          |         |          | 2%    |        | 5%  | 3%          | 6%      |
| 51     | Shelf-Stable Desserts                     |         |         | 1%             |         | 11%     | 1%     | 1%      | 2%     |         | 10%     |       | 0%          | 13%    | 12%    | 10%      |         |          | 4%    |        | 8%  | 4%          | 13%     |
| 52     | Soy-Based Frozen Products                 |         |         |                | 20%     | 40%     |        |         | 100%   |         |         |       |             |        |        |          |         |          |       |        |     | 6%          | 100%    |
| 53     | Water-Based Frozen Desserts               | 7%      |         | 9%             | 9%      | 10%     | 7%     | 5%      |        |         | 25%     | 10%   | 6%          | 23%    | 17%    |          |         |          | 6%    |        | 16% | 9%          | 25%     |
| 54     | Fruit & Vegetables                        | 0%      |         |                | 2%      |         | 0%     | 0%      | 0%     | 1%      |         | 0%    | 1%          |        | 0%     | 0%       |         |          |       |        | 1%  | 0%          | 2%      |
| 55     | Fruit                                     | 2%      |         |                | 6%      |         | 1%     | 1%      | 2%     |         | 2%      |       | 5%          |        | 1%     | 1%       |         |          |       |        | 2%  | 1%          | 6%      |
| 56     | Vegetables                                |         |         |                |         |         |        | 0%      |        |         | 1%      |       |             |        |        |          |         |          |       |        |     | 0%          | 1%      |
| 57     | Hot Beverages                             |         |         |                |         | 0%      | 0%     |         |        |         |         | 0%    |             |        |        |          |         |          |       |        | 0%  | 0%          | 0%      |
| 58     | Tea                                       |         |         |                |         | 0%      | 0%     |         |        |         |         | 0%    |             |        |        |          |         |          |       |        | 0%  | 0%          | 0%      |

Supplementary B4. Pertentage of total products containing anthocyanins E163

| Number | Categories                            | Belgium | Croatia | Czech Republic | Denmark | Finland | France | Germany | Greece | Hungary | Ireland | Italy | Netherlands | Norway | Poland | Portugal | Romania | Slovakia | Spain | Sweden | UK  | Grand Total | Maximum |
|--------|---------------------------------------|---------|---------|----------------|---------|---------|--------|---------|--------|---------|---------|-------|-------------|--------|--------|----------|---------|----------|-------|--------|-----|-------------|---------|
| 59     | Juice Drinks                          | 2%      |         | 2%             | 0%      | 2%      | 2%     | 1%      |        | 3%      | 5%      | 5%    | 1%          | 1%     | 5%     | 1%       | 7%      |          | 2%    | 2%     | 4%  | 2%          | 7%      |
| 60     | Fruit/Flavoured Still Drinks          | 5%      |         | 7%             | 3%      | 12%     | 9%     | 6%      |        | 6%      | 14%     | 12%   | 3%          | 6%     | 10%    | 2%       | 14%     |          | 4%    | 6%     | 11% | 8%          | 14%     |
| 61     | Juice                                 |         |         |                |         |         | 0%     | 0%      |        |         | 3%      | 0%    |             |        |        |          |         |          | 0%    | 1%     | 1%  | 0%          | 3%      |
| 62     | Nectars                               | 5%      |         | 2%             |         |         | 1%     | 1%      |        | 1%      | 4%      | 6%    | 2%          | 2%     | 2%     | 2%       |         |          | 1%    |        | 6%  | 2%          | 6%      |
| 63     | Meals & Meal Centers                  | 0%      |         |                |         |         | 0%     | 0%      |        |         | 0%      |       | 0%          | 0%     | 1%     |          |         |          | 0%    |        | 0%  | 0%          | 1%      |
| 64     | Instant Noodles                       |         |         |                |         |         |        |         |        |         |         |       |             |        |        |          |         |          | 2%    |        | 1%  | 0%          | 2%      |
| 65     | Meal Kits                             |         |         |                |         |         | 1%     |         |        |         |         |       |             |        |        |          |         |          |       |        |     | 0%          | 1%      |
| 66     | Pizzas                                |         |         |                |         |         |        |         |        |         | 2%      |       |             | 1%     | 1%     | 2%       |         |          |       |        | 1%  | 0%          | 2%      |
| 67     | Prepared Meals                        |         |         |                |         |         | 0%     |         |        |         |         |       | 1%          | 1%     | 2%     |          |         |          |       |        |     | 0%          | 2%      |
| 68     | Salads                                |         |         |                |         |         | 1%     |         |        |         |         |       |             |        |        |          |         |          |       |        |     | 0%          | 1%      |
| 69     | Sandwiches/Wraps                      |         |         |                |         |         |        |         |        |         |         |       |             |        |        |          |         |          |       |        | 0%  | 0%          | 0%      |
| 70     | Other Beverages                       | 8%      |         | 7%             | 1%      | 5%      | 5%     | 3%      |        | 3%      | 28%     | 1%    | 4%          | 8%     | 5%     |          | 14%     |          | 1%    | 7%     | 11% | 6%          | 28%     |
| 71     | Beverage Concentrates                 | 13%     |         | 7%             | 2%      | 10%     | 7%     | 6%      |        | 5%      | 30%     | 2%    | 6%          | 11%    | 7%     |          | 33%     |          | 3%    | 10%    | 20% | 9%          | 33%     |
| 72     | Beverage Mixes                        |         |         | 8%             |         |         |        | 3%      |        | 3%      |         |       |             |        |        |          |         |          | 1%    |        | 4%  | 2%          | 8%      |
| 73     | Meal Replacements & Other Drinks      |         |         |                |         | 3%      |        |         |        |         |         |       |             | 4%     |        |          |         |          |       | 3%     | 0%  | 1%          | 4%      |
| 74     | Processed Fish, Meat & Egg Products   |         |         | 0%             |         |         | 0%     | 0%      | 0%     |         | 0%      | 0%    | 0%          |        |        |          |         |          | 0%    | 0%     | 0%  | 0%          | 0%      |
| 75     | Fish Products                         |         |         |                |         |         | 0%     | 0%      | 1%     |         |         | 0%    |             |        |        |          |         |          | 0%    |        | 0%  | 0%          | 1%      |
| 76     | Meat Products                         |         |         |                |         |         | 0%     |         |        |         |         |       |             |        |        |          |         |          |       |        | 0%  | 0%          | 0%      |
| 77     | Meat Substitutes                      |         |         | 2%             |         |         |        | 1%      | 0%     |         |         |       | 2%          |        |        |          |         |          |       | 1%     | 0%  | 0%          | 2%      |
| 78     | Poultry Products                      |         |         |                |         |         |        |         |        |         | 1%      |       |             |        |        |          |         |          |       |        |     | 0%          | 1%      |
| 79     | RTDs                                  |         |         |                | 6%      | 3%      |        | 2%      | 2%     | 4%      |         | 1%    | 3%          |        | 2%     |          |         |          | 1%    |        | 2%  | 1%          | 6%      |
| 80     | RTD (Iced) Tea                        |         |         |                | 6%      | 3%      |        | 2%      | 2%     | 4%      |         | 1%    | 3%          |        | 2%     |          |         |          | 1%    |        | 2%  | 1%          | 6%      |
| 81     | Sauces & Seasonings                   | 0%      |         |                |         | 0%      | 0%     | 0%      | 0%     |         |         |       |             |        | 1%     |          |         |          | 0%    | 0%     | 0%  | 0%          | 1%      |
| 82     | Cooking Sauces                        |         |         |                |         | 1%      |        | 0%      | 1%     |         |         |       |             |        | 2%     |          |         |          | 0%    | 1%     |     | 0%          | 2%      |
| 83     | Dressings & Vinegar                   |         |         |                |         |         | 1%     |         |        |         |         |       |             |        |        |          |         |          | 0%    |        |     | 0%          | 1%      |
| 84     | Other Sauces & Seasonings             |         |         |                |         |         |        |         |        |         |         |       |             |        |        |          |         |          |       |        | 1%  | 0%          | 1%      |
| 85     | Pasta Sauces                          |         |         |                |         |         |        |         |        |         |         |       |             |        | 3%     |          |         |          |       |        |     | 0%          | 3%      |
| 86     | Pickled Condiments                    |         |         |                |         |         | 0%     | 0%      |        |         |         |       |             |        | 0%     |          |         |          | 1%    |        | 0%  | 0%          | 1%      |
| 87     | Seasonings                            |         |         |                |         |         | 0%     |         |        |         |         |       |             |        |        |          |         |          | 0%    |        |     | 0%          | 0%      |
| 88     | Table Sauces                          | 1%      |         |                |         | 1%      | 1%     | 0%      | 1%     |         |         |       |             |        | 2%     |          |         |          | 0%    | 0%     |     | 0%          | 2%      |
| 89     | Savoury Spreads                       |         |         |                |         |         |        | 0%      |        |         |         |       |             |        |        |          |         |          |       |        |     | 0%          | 0%      |
| 90     | Meat Pastes & Pates                   |         |         |                |         |         |        | 0%      |        |         |         |       |             |        |        |          |         |          |       |        |     | 0%          | 0%      |
| 91     | Savoury Vegetable Pastes/Spreads      |         |         |                |         |         |        |         |        |         |         |       |             |        |        |          |         |          |       |        |     | 0%          | 0%      |
| 92     | Side Dishes                           |         |         |                |         | 0%      |        |         |        |         |         |       |             |        |        |          |         |          |       |        | 0%  | 0%          | 0%      |
| 93     | Potato Products                       |         |         |                |         | 1%      |        |         |        |         |         |       |             |        |        |          |         |          |       |        |     | 0%          | 1%      |
| 94     | Rice                                  |         |         |                |         |         |        |         |        |         |         |       |             |        |        |          |         |          |       |        | 0%  | 0%          | 0%      |
| 95     | Stuffing, Polenta & Other Side Dishes |         |         |                |         |         |        |         |        |         |         |       |             |        |        |          |         |          |       |        |     |             | 0%      |
| 96     | Snacks                                | 1%      | 6%      |                |         | 0%      | 1%     | 0%      | 0%     | 0%      | 2%      | 0%    | 0%          | 1%     | 0%     | 1%       |         |          | 0%    |        | 2%  | 1%          | 6%      |
| 97     | Corn-Based Snacks                     |         |         |                |         |         |        |         |        |         |         |       |             |        |        |          |         |          | 0%    |        |     | 0%          | 0%      |
| 98     | Fruit Snacks                          | 4%      |         |                | 3%      |         | 1%     | 0%      |        |         | 8%      | 1%    | 1%          |        |        |          |         |          | 0%    |        | 7%  | 2%          | 8%      |
| 99     | Hors d'oeuvres/Canapes                |         |         |                |         |         | 0%     | 0%      |        |         |         |       | 1%          |        |        |          |         |          | 0%    |        | 0%  | 0%          | 1%      |
| 100    | Nuts                                  |         |         |                |         |         |        |         |        |         |         |       |             |        |        |          |         |          |       |        |     |             | 0%      |
| 101    | Popcorn                               |         |         |                |         |         |        |         |        |         |         |       |             |        |        |          |         |          |       |        | 0%  | 0%          | 0%      |
| 102    | Rice Snacks                           |         |         |                |         |         |        |         |        |         |         |       |             |        |        |          | 14%     |          |       |        |     | 0%          | 14%     |
| 103    | Snack Mixes                           |         |         |                |         |         | 6%     | 1%      |        |         |         |       | 1%          | 4%     |        | 4%       |         |          | 2%    |        | 1%  | 2%          | 6%      |
| 104    | Snack/Cereal/Energy Bars              | 1%      | 25%     | 2%             | 1%      | 0%      | 1%     | 1%      | 2%     | 1%      | 5%      |       |             | 1%     | 1%     | 1%       |         |          | 2%    |        | 3%  | 2%          | 25%     |
| 105    | Vegetable Snacks                      |         |         |                |         |         |        |         |        |         |         |       | 4%          | 13%    |        |          |         |          |       |        | 2%  | 1%          | 13%     |
| 106    | Wheat & Other Grain-Based Snacks      |         |         |                |         |         |        |         |        |         |         |       |             | 0%     |        |          |         |          | 1%    |        | 0%  | 0%          | 1%      |
| 107    | Sports & Energy Drinks                | 11%     |         | 7%             | 10%     | 11%     | 7%     | 6%      | 13%    | 6%      | 13%     | 9%    | 4%          | 24%    | 4%     | 9%       | 14%     | 13%      | 5%    |        | 14% | 8%          | 24%     |
| 108    | Energy Drinks                         | 16%     |         | 7%             | 11%     | 14%     | 7%     | 9%      | 14%    | 6%      | 11%     | 8%    | 5%          | 25%    | 6%     | 13%      | 14%     | 13%      | 5%    |        | 14% | 10%         | 25%     |
| 109    | Sports Drinks                         |         |         | 4%             |         | 4%      | 8%     | 2%      |        | 4%      | 20%     | 11%   | 2%          | 14%    | 2%     |          |         |          | 6%    |        | 14% | 6%          | 20%     |
| 110    | Sugar & Gum Confectionery             | 13%     | 8%      | 10%            | 5%      | 8%      | 19%    | 7%      | 6%     | 11%     | 27%     | 7%    | 9%          | 9%     | 11%    | 12%      | 10%     | 30%      | 5%    | 4%     | 27% | 12%         | 30%     |
| 111    | Boiled Sweets                         | 9%      |         | 9%             |         |         | 14%    | 5%      |        | 12%     | 27%     | 1%    | 8%          |        | 21%    | 17%      |         |          | 5%    | 0%     | 38% | 14%         | 38%     |
| 112    | Gum                                   | 3%      |         | 4%             | 3%      | 2%      | 6%     | 5%      | 8%     | 3%      |         | 3%    | 2%          | 2%     | 4%     | 3%       |         |          | 5%    | 3%     | 5%  | 4%          | 8%      |
| 113    | Liquorice                             |         |         | 25%            | 2%      |         | 3%     | 1%      |        |         |         |       |             | 4%     |        | 20%      |         |          | 6%    |        | 19% | 4%          | 25%     |
| 114    | Lollipops                             | 27%     |         | 33%            |         | 33%     | 17%    | 13%     |        |         | 100%    | 17%   | 30%         |        | 14%    | 13%      |         |          | 5%    |        | 39% | 19%         | 100%    |
| 115    | Marshmallows                          |         |         |                |         |         | 5%     | 4%      |        |         |         | 3%    |             | 8%     |        | 22%      |         |          |       |        | 3%  | 3%          | 22%     |
| 116    | Medicated Confectionery               |         |         | 8%             | 20%     | 11%     |        | 3%      | 4%     | 4%      | 10%     | 4%    | 3%          | 3%     | 6%     | 5%       |         |          | 8%    | 13%    | 28% | 6%          | 28%     |
| 117    | Mixed Assortments                     | 100%    |         |                | 7%      | 27%     | 56%    | 35%     |        |         |         | 27%   | 20%         | 12%    |        | 50%      |         |          | 29%   | 25%    | 58% | 35%         | 100%    |

Supplementary B4. Pertentage of total products containing anthocyanins E163

| Number | Categories                       | Belgium | Croatia | Czech Republic | Denmark | Finland | France | Germany | Greece | Hungary | Ireland | Italy | Netherlands | Norway | Poland | Portugal | Romania | Slovakia | Spain | Sweden | UK  | Grand Total | Maximum |
|--------|----------------------------------|---------|---------|----------------|---------|---------|--------|---------|--------|---------|---------|-------|-------------|--------|--------|----------|---------|----------|-------|--------|-----|-------------|---------|
| 118    | Other Sugar Confectionery        |         |         |                |         |         | 4%     | 9%      |        | 5%      | 33%     | 4%    | 8%          | 15%    |        | 13%      | 20%     |          | 4%    |        | 24% | 8%          | 33%     |
| 119    | Pastilles, Gums, Jellies & Chews | 28%     | 25%     | 18%            | 10%     | 18%     | 40%    | 12%     | 15%    | 25%     | 41%     | 23%   | 20%         | 22%    | 24%    | 25%      | 25%     | 64%      | 16%   | 5%     | 42% | 26%         | 64%     |
| 120    | Standard & Power Mints           |         |         | 5%             |         |         | 1%     |         | 0%     | 5%      |         |       | 2%          | 7%     | 3%     |          |         |          |       |        | 5%  | 2%          | 7%      |
| 121    | Sticks, Liquids & Sprays         |         |         |                | 100%    |         |        |         |        |         |         |       | 9%          | 17%    |        | 100%     |         |          |       |        | 16% | 13%         | 100%    |
| 122    | Toffees, Caramels & Nougat       | 4%      |         | 3%             |         |         | 1%     | 1%      | 0%     |         |         | 1%    | 3%          |        |        | 6%       |         |          | 1%    |        | 2%  | 1%          | 6%      |
| 123    | Sweet Spreads                    |         |         | 2%             | 1%      |         |        | 0%      | 1%     |         |         | 0%    | 1%          |        | 4%     | 1%       |         |          |       |        | 1%  | 0%          | 4%      |
| 124    | Chocolate Spreads                |         |         |                |         |         |        |         |        |         |         |       | 1%          |        |        | 4%       |         |          |       |        |     | 0%          | 4%      |
| 125    | Confiture & Fruit Spreads        |         |         | 4%             | 1%      |         |        | 0%      | 1%     |         |         |       | 1%          |        | 5%     |          |         |          |       |        | 1%  | 1%          | 5%      |
| 126    | Honey                            |         |         |                |         |         |        |         |        |         |         | 1%    |             |        |        |          |         |          |       |        |     | 0%          | 1%      |
| 127    | Sweeteners & Sugar               |         |         |                |         |         | 1%     |         |        |         |         |       |             |        |        | 7%       |         |          |       |        |     | 0%          | 7%      |
| 128    | Sucrose                          |         |         |                |         |         | 1%     |         |        |         |         |       |             |        |        | 7%       |         |          |       |        |     | 0%          | 7%      |
| 129    | Water                            |         |         |                | 9%      | 2%      | 5%     | 3%      |        |         |         | 25%   |             | 8%     | 3%     |          |         |          |       | 4%     | 5%  | 3%          | 25%     |
|        | Flavoured Water                  |         |         |                | 9%      | 2%      | 5%     | 3%      |        |         |         | 25%   |             | 8%     | 3%     |          |         |          |       | 4%     | 5%  | 3%          | 25%     |
|        |                                  |         |         |                |         |         |        |         |        |         |         |       |             |        |        |          |         |          |       |        |     |             |         |
|        | Total (Categories)               | 2%      | 2%      | 1%             | 1%      | 2%      | 2%     | 1%      | 1%     | 2%      | 3%      | 1%    | 1%          | 2%     | 2%     | 2%       | 2%      | 2%       | 1%    | 1%     | 3%  | 2%          |         |
|        | Maximim (Categories)             | 13%     | 100%    | 10%            | 10%     | 11%     | 19%    | 7%      | 13%    | 11%     | 28%     | 25%   | 9%          | 24%    | 11%    | 12%      | 14%     | 30%      | 5%    | 12%    | 27% |             |         |

Supplementary B5. Percentage of products containing CFS

[illegible]

Supplementary B5. Percentage of products containing CFS

| Number | Categories                            | Belgium | Croatia | Czech Republic | Denmark | Finland | France | Germany | Greece | Hungary | Ireland | Italy | Netherlands | Norway | Poland | Portugal | Romania | Slovakia | Spain | Sweden | UK  | Grand Total | Maximum |
|--------|---------------------------------------|---------|---------|----------------|---------|---------|--------|---------|--------|---------|---------|-------|-------------|--------|--------|----------|---------|----------|-------|--------|-----|-------------|---------|
| 59     | Juice Drinks                          | 2%      |         | 2%             | 1%      | 1%      | 1%     | 3%      |        | 1%      | 2%      | 4%    | 1%          | 0%     | 3%     | 1%       |         |          | 1%    | 1%     | 1%  | 2%          | 4%      |
| 60     | Fruit/Flavoured Still Drinks          | 2%      |         | 5%             | 10%     | 2%      | 6%     | 11%     |        | 2%      | 3%      | 6%    | 1%          |        | 7%     | 4%       |         |          | 1%    | 2%     | 3%  | 4%          | 11%     |
| 61     | Juice                                 |         |         | 0%             |         |         | 0%     | 1%      |        |         | 2%      | 1%    |             |        |        |          |         |          | 0%    | 1%     | 1%  | 1%          | 2%      |
| 62     | Nectars                               | 5%      |         | 2%             |         | 3%      | 1%     | 2%      |        |         | 1%      | 6%    | 2%          | 2%     | 1%     | 1%       |         |          | 1%    |        | 1%  | 2%          | 6%      |
| 63     | Meals & Meal Centers                  |         |         |                |         |         |        |         |        |         |         |       |             |        | 1%     |          |         |          |       |        | 0%  | 0%          | 1%      |
| 64     | Instant Noodles                       |         |         |                |         |         |        |         |        |         |         |       |             |        |        |          |         |          |       |        |     |             | 0%      |
| 65     | Meal Kits                             |         |         |                |         |         |        |         |        |         |         |       |             |        |        |          |         |          |       |        |     |             | 0%      |
| 66     | Pizzas                                |         |         |                |         |         |        |         |        |         |         |       |             |        |        |          |         |          |       |        |     |             | 0%      |
| 67     | Prepared Meals                        |         |         |                |         |         |        |         |        |         |         |       |             |        | 2%     | 0%       |         |          |       |        | 0%  | 0%          | 2%      |
| 68     | Salads                                |         |         |                |         |         |        |         |        |         |         |       |             |        |        |          |         |          |       |        |     |             | 0%      |
| 69     | Sandwiches/Wraps                      |         |         |                |         |         |        |         |        |         |         |       |             |        |        |          |         |          |       |        |     |             | 0%      |
| 70     | Other Beverages                       | 7%      | 17%     | 6%             | 1%      | 2%      | 5%     | 4%      |        | 2%      | 4%      | 1%    | 5%          | 2%     | 3%     |          |         |          |       | 1%     | 2%  | 3%          | 17%     |
| 71     | Beverage Concentrates                 | 11%     | 20%     | 10%            |         |         | 6%     | 9%      |        | 3%      | 5%      | 2%    | 10%         | 2%     | 5%     |          |         |          |       |        | 3%  | 5%          | 20%     |
| 72     | Beverage Mixes                        |         |         |                |         |         |        | 1%      |        | 1%      |         |       |             |        |        |          |         |          |       |        | 2%  | 1%          | 2%      |
| 73     | Meal Replacements & Other Drinks      |         |         |                | 5%      | 3%      |        | 1%      |        |         |         |       |             | 4%     |        |          |         |          |       | 3%     |     | 1%          | 5%      |
| 74     | Processed Fish, Meat & Egg Products   |         |         | 0%             |         |         |        | 0%      |        |         |         |       |             |        |        |          |         |          |       |        | 0%  | 0%          | 0%      |
| 75     | Fish Products                         |         |         |                |         |         |        |         |        |         |         |       |             |        |        |          |         |          |       |        |     | 0%          | 0%      |
| 76     | Meat Products                         |         |         |                |         |         |        |         |        |         |         |       |             |        |        |          |         |          |       |        | 0%  | 0%          | 0%      |
| 77     | Meat Substitutes                      |         |         | 2%             |         |         |        |         |        |         |         |       |             |        |        |          |         |          |       |        |     | 0%          | 2%      |
| 78     | Poultry Products                      |         |         |                |         |         |        | 0%      |        |         |         |       | 1%          |        |        |          |         |          |       |        |     | 0%          | 1%      |
| 79     | RTDs                                  |         |         |                | 6%      | 3%      |        | 5%      | 2%     | 3%      |         | 1%    | 3%          |        | 2%     |          |         |          | 1%    |        | 2%  | 2%          | 6%      |
| 80     | RTD (Iced) Tea                        |         |         |                | 6%      | 3%      |        | 5%      | 2%     | 3%      |         | 1%    | 3%          |        | 2%     |          |         |          | 1%    |        | 2%  | 2%          | 6%      |
| 81     | Sauces & Seasonings                   | 0%      |         |                |         |         | 0%     | 0%      |        |         |         |       |             |        | 1%     |          |         |          | 0%    |        |     | 0%          | 1%      |
| 82     | Cooking Sauces                        |         |         |                |         |         |        | 0%      |        |         |         |       |             |        | 2%     |          |         |          | 0%    |        |     | 0%          | 2%      |
| 83     | Dressings & Vinegar                   |         |         |                |         |         | 1%     | 0%      |        |         |         |       |             |        |        |          |         |          |       |        |     | 0%          | 1%      |
| 84     | Other Sauces & Seasonings             |         |         |                |         |         |        |         |        |         |         |       |             |        |        |          |         |          |       |        |     |             | 0%      |
| 85     | Pasta Sauces                          |         |         |                |         |         |        |         |        |         |         |       |             |        | 3%     |          |         |          |       |        |     | 0%          | 3%      |
| 86     | Pickled Condiments                    |         |         |                |         |         |        |         |        |         |         |       |             |        | 0%     |          |         |          |       |        |     | 0%          | 0%      |
| 87     | Seasonings                            | 1%      |         |                |         |         | 0%     |         |        |         |         |       |             |        |        |          |         |          |       |        |     | 0%          | 1%      |
| 88     | Table Sauces                          | 1%      |         |                |         |         | 1%     | 0%      |        |         |         |       |             |        | 2%     |          |         |          |       |        |     | 0%          | 2%      |
| 89     | Savoury Spreads                       |         |         | 1%             |         |         |        | 0%      |        |         | 3%      |       |             |        |        |          |         |          |       |        |     | 0%          | 3%      |
| 90     | Meat Pastes & Pates                   |         |         |                |         |         |        |         |        |         | 3%      |       |             |        |        |          |         |          |       |        |     | 0%          | 3%      |
| 91     | Savoury Vegetable Pastes/Spreads      |         |         |                |         |         |        | 0%      |        |         |         |       |             |        |        |          |         |          |       |        |     | 0%          | 2%      |
| 92     | Side Dishes                           |         |         |                |         |         |        |         |        |         |         |       |             |        |        |          |         |          |       |        |     | 0%          | 0%      |
| 93     | Potato Products                       |         |         |                |         |         |        |         |        |         |         |       |             |        |        |          |         |          |       |        |     | 0%          | 0%      |
| 94     | Rice                                  |         |         |                |         |         |        |         |        |         |         |       |             |        |        |          |         |          |       |        |     | 0%          | 0%      |
| 95     | Stuffing, Polenta & Other Side Dishes |         |         |                |         |         |        |         |        |         |         |       |             |        |        |          |         |          |       |        | 0%  | 0%          | 0%      |
| 96     | Snacks                                |         | 4%      | 1%             | 1%      | 1%      | 1%     | 1%      | 0%     | 1%      | 1%      | 1%    | 0%          | 1%     | 0%     |          |         |          | 0%    |        | 1%  | 1%          | 4%      |
| 97     | Corn-Based Snacks                     |         |         | 2%             |         |         |        |         |        |         |         |       |             |        |        |          |         |          | 0%    |        |     | 0%          | 2%      |
| 98     | Fruit Snacks                          |         | 15%     |                | 2%      | 2%      | 2%     | 2%      |        | 4%      | 8%      | 2%    | 1%          | 4%     | 1%     |          |         |          | 1%    |        | 3%  | 2%          | 15%     |
| 99     | Hors d'oeuvres/Canapes                |         |         |                |         |         | 0%     | 0%      |        |         |         |       |             |        |        |          |         |          |       |        |     | 0%          | 0%      |
| 100    | Nuts                                  |         |         |                |         |         |        | 0%      |        |         |         |       |             |        |        |          |         |          |       |        |     | 0%          | 0%      |
| 101    | Popcorn                               |         |         |                |         |         |        |         |        |         |         |       |             |        |        |          |         |          |       |        |     |             | 0%      |
| 102    | Rice Snacks                           |         |         |                |         |         |        |         |        |         |         |       |             |        |        |          |         |          |       |        |     |             | 0%      |
| 103    | Snack Mixes                           |         |         | 7%             |         |         | 3%     | 0%      |        |         |         | 3%    |             |        |        |          |         |          | 1%    |        | 2%  | 1%          | 7%      |
| 104    | Snack/Cereal/Energy Bars              |         |         | 1%             | 1%      | 0%      | 1%     | 2%      | 1%     | 1%      |         | 5%    |             | 1%     | 2%     |          |         |          | 1%    |        | 1%  | 1%          | 5%      |
| 105    | Vegetable Snacks                      |         |         |                |         |         |        |         |        |         |         |       |             |        |        |          |         |          |       |        |     |             | 0%      |
| 106    | Wheat & Other Grain-Based Snacks      |         |         |                |         | 0%      | 1%     | 0%      |        |         |         |       |             |        |        |          |         |          | 1%    |        | 0%  | 0%          | 1%      |
| 107    | Sports & Energy Drinks                | 6%      |         | 3%             |         | 3%      | 2%     | 6%      |        | 5%      | 13%     | 5%    | 3%          | 4%     | 5%     | 7%       | 14%     | 13%      | 2%    |        | 7%  | 5%          | 14%     |
| 108    | Energy Drinks                         | 9%      |         | 4%             |         | 5%      | 2%     | 8%      |        | 5%      | 11%     | 5%    | 4%          | 2%     | 7%     | 10%      | 14%     | 13%      | 3%    |        | 9%  | 6%          | 14%     |
| 109    | Sports Drinks                         |         |         |                |         |         | 2%     | 2%      |        | 4%      | 20%     | 6%    | 2%          | 14%    | 2%     |          |         |          |       |        | 4%  | 2%          | 20%     |
| 110    | Sugar & Gum Confectionery             | 7%      |         | 9%             | 2%      | 5%      | 5%     | 9%      | 2%     | 7%      | 14%     | 4%    | 7%          | 6%     | 10%    | 6%       | 3%      | 22%      | 2%    | 3%     | 12% | 7%          | 22%     |
| 111    | Boiled Sweets                         |         |         |                |         | 9%      | 2%     | 7%      |        | 4%      | 9%      | 2%    | 3%          |        | 14%    | 7%       |         |          | 5%    |        | 7%  | 5%          | 14%     |
| 112    | Gum                                   |         |         |                |         |         | 1%     |         |        |         |         | 1%    |             |        | 0%     |          |         |          |       |        |     | 0%          | 1%      |
| 113    | Liquorice                             |         |         |                |         |         |        | 3%      |        |         |         |       | 1%          | 3%     |        |          |         |          | 3%    |        | 17% | 3%          | 17%     |
| 114    | Lollipops                             | 9%      |         | 11%            |         |         |        | 5%      |        |         |         |       | 5%          |        |        |          |         |          | 2%    |        | 4%  | 3%          | 11%     |
| 115    | Marshmallows                          |         |         | 0%             |         |         |        | 3%      |        |         |         |       | 0%          | 8%     | 10%    |          |         |          | 0%    |        | 0%  | 1%          | 10%     |
| 116    | Medicated Confectionery               | 15%     |         | 4%             |         |         |        | 3%      | 4%     |         |         | 4%    | 3%          | 3%     | 3%     | 5%       |         |          | 4%    |        | 12% | 4%          | 15%     |
| 117    | Mixed Assortments                     | 25%     |         |                |         | 16%     | 10%    | 40%     |        |         |         | 9%    | 27%         | 4%     |        |          |         |          | 18%   |        | 15% | 17%         | 40%     |

Supplementary B5. Percentage of products containing CFS

| Number | Categories                       | Belgium | Croatia | Czech Republic | Denmark | Finland | France | Germany | Greece | Hungary | Ireland | Italy | Netherlands | Norway | Poland | Portugal | Romania | Slovakia | Spain | Sweden | UK  | Grand Total | Maximum |
|--------|----------------------------------|---------|---------|----------------|---------|---------|--------|---------|--------|---------|---------|-------|-------------|--------|--------|----------|---------|----------|-------|--------|-----|-------------|---------|
| 118    | Other Sugar Confectionery        |         |         |                |         |         | 3%     | 1%      |        |         |         | 3%    | 3%          |        | 0%     |          | 20%     |          | 0%    |        | 0%  | 1%          | 20%     |
| 119    | Pastilles, Gums, Jellies & Chews | 19%     |         | 26%            | 14%     | 13%     | 12%    | 24%     | 7%     | 20%     | 26%     | 13%   | 20%         | 18%    | 26%    | 23%      |         | 45%      | 11%   | 10%    | 25% | 20%         | 45%     |
| 120    | Standard & Power Mints           |         |         |                |         |         |        |         |        |         |         |       |             | 4%     |        |          |         |          |       |        | 0%  | 0%          | 4%      |
| 121    | Sticks, Liquids & Sprays         |         |         |                |         |         |        |         |        |         |         |       |             |        |        | 100%     |         |          |       |        | 0%  | 1%          | 100%    |
| 122    | Toffees, Caramels & Nougat       |         |         | 3%             |         |         |        |         |        |         |         |       |             |        |        |          |         |          |       |        | 1%  | 0%          | 3%      |
| 123    | Sweet Spreads                    |         |         | 2%             |         |         |        | 1%      |        |         |         | 0%    | 0%          |        | 3%     |          |         |          | 0%    |        | 0%  | 0%          | 3%      |
| 124    | Chocolate Spreads                |         |         |                |         |         |        |         |        |         |         |       |             |        |        |          |         |          |       |        |     |             | 0%      |
| 125    | Confiture & Fruit Spreads        |         |         | 4%             |         |         |        | 1%      |        |         |         | 0%    | 1%          |        | 3%     |          |         |          | 0%    |        | 1%  | 1%          | 4%      |
| 126    | Honey                            |         |         |                |         |         |        | 1%      |        |         |         |       |             |        |        |          |         |          |       |        |     |             | 1%      |
| 127    | Sweeteners & Sugar               |         |         |                |         |         | 0%     |         |        |         |         |       |             |        |        |          |         |          |       |        |     | 0%          | 0%      |
| 128    | Sucrose                          |         |         |                |         |         | 0%     |         |        |         |         |       |             |        |        |          |         |          |       |        |     | 0%          | 0%      |
| 129    | Water                            |         |         |                |         |         | 3%     | 2%      |        |         |         | 25%   |             | 4%     | 3%     |          | 100%    |          |       |        | 2%  | 2%          | 100%    |
|        | Flavoured Water                  |         |         |                |         |         | 3%     | 2%      |        |         |         | 25%   |             | 4%     | 3%     |          | 100%    |          |       |        | 2%  | 2%          | 100%    |
|        |                                  |         |         |                |         |         |        |         |        |         |         |       |             |        |        |          |         |          |       |        |     |             |         |
|        | Total (Categories)               | 2%      | 2%      | 1%             | 1%      | 2%      | 2%     | 1%      | 1%     | 2%      | 3%      | 1%    | 1%          | 2%     | 2%     | 2%       | 2%      | 2%       | 1%    | 1%     | 3%  | 2%          |         |
|        | Maximim (Categories)             | 13%     | 100%    | 10%            | 10%     | 11%     | 19%    | 7%      | 13%    | 11%     | 28%     | 25%   | 9%          | 24%    | 11%    | 12%      | 14%     | 30%      | 5%    | 12%    | 27% |             |         |
