# Supplementary material
Source: publisher figshare collection journal article supplement (https://tandf.figshare.com/articles/dataset/_/3395740)
Supplement: Supplementary file 2 [file 1]

| FoodEx L3 Code | Foodex L2                                          | Foodex L3                                          | Typ | Max | E163 Occ | CFS Occ | Total Occ |
|----------------|----------------------------------------------------|----------------------------------------------------|-----|-----|----------|---------|-----------|
| A.01.000169    | Pasta (Raw)                                        | Glass noodle                                       | 100 | 200 | 0.02     | 0       | 0.02      |
| A.01.000170    | Pasta (Raw)                                        | Noodle, rice                                       | 100 | 200 | 0.02     | 0       | 0.02      |
| A.01.000171    | Pasta (Raw)                                        | Noodle, wheat flour, with eggs                     | 100 | 200 | 0.02     | 0       | 0.02      |
| A.01.000184    | Breakfast cereals                                  | Breakfast cereals                                  | 100 | 200 | 0.01     | 0.04    | 0.05      |
| A.01.000185    | Breakfast cereals                                  | Cereal flakes                                      | 100 | 200 | 0.01     | 0.04    | 0.05      |
| A.01.000210    | Breakfast cereals                                  | Muesli                                             | 100 | 120 | 0.01     | 0.04    | 0.05      |
| A.01.000220    | Breakfast cereals                                  | Cereal bars                                        | 100 | 120 | 0.25     | 0.05    | 0.3       |
| A.01.000225    | Breakfast cereals                                  | Popped cereals                                     | 100 | 200 | 0.01     | 0.04    | 0.05      |
| A.01.000233    | Breakfast cereals                                  | Mixed breakfast cereals                            | 100 | 200 | 0.01     | 0.04    | 0.05      |
| A.01.000240    | Breakfast cereals                                  | Grits                                              | 100 | 120 | 0.03     | 0       | 0.03      |
| A.01.000246    | Breakfast cereals                                  | Porridge                                           | 100 | 120 | 0.03     | 0       | 0.03      |
| A.01.000252    | Fine bakery wares                                  | Fine bakery wares                                  | 40  | 70  | 0.08     | 0.05    | 0.13      |
| A.01.000253    | Fine bakery wares                                  | Pastries and cakes                                 | 40  | 70  | 0.08     | 0.05    | 0.13      |
| A.01.000302    | Fine bakery wares                                  | Biscuits (cookies)                                 | 40  | 70  | 0.08     | 0.05    | 0.13      |
| A.01.000444    | Vegetable products                                 | Mixed vegetable purée                              | 80  | 120 | 0.01     | 0.01    | 0.02      |
| A.01.000445    | Vegetable products                                 | Pickled vegetables                                 | 80  | 120 | 0.01     | 0.01    | 0.02      |
| A.01.000446    | Vegetable products                                 | Sauerkraut                                         | 80  | 120 | 0.01     | 0.01    | 0.02      |
| A.01.000647    | Dried fruits                                       | Dried fruits                                       | 80  | 120 | 0.06     | 0.06    | 0.12      |
| A.01.000648    | Dried fruits                                       | Dried vine fruits (currants, raisins and sultanas) | 80  | 120 | 0.06     | 0.06    | 0.12      |
| A.01.000649    | Dried fruits                                       | Dried figs (Ficus carica)                          | 80  | 120 | 0.06     | 0.06    | 0.12      |
| A.01.000650    | Dried fruits                                       | Dried prunes (Prunus domestica)                    | 80  | 120 | 0.06     | 0.06    | 0.12      |
| A.01.000651    | Dried fruits                                       | Dried apricots (Prunus armeniaca)                  | 80  | 120 | 0.06     | 0.06    | 0.12      |
| A.01.000652    | Dried fruits                                       | Dried pears (Pyrus communis)                       | 80  | 120 | 0.06     | 0.06    | 0.12      |
| A.01.000653    | Dried fruits                                       | Dried apples (Malus domestica)                     | 80  | 120 | 0.06     | 0.06    | 0.12      |
| A.01.000654    | Dried fruits                                       | Dried dates (Phoenix dactylifera)                  | 80  | 120 | 0.06     | 0.06    | 0.12      |
| A.01.000655    | Dried fruits                                       | Dried bananas (Musa x paradisiaca)                 | 80  | 120 | 0.06     | 0.06    | 0.12      |
| A.01.000656    | Dried fruits                                       | Dried mangoes (Mangifera indica)                   | 80  | 120 | 0.06     | 0.06    | 0.12      |
| A.01.000657    | Jam, marmalade and other fruit spreads             | Jam, marmalade and other fruit spreads             | 100 | 100 | 0.05     | 0.04    | 0.09      |
| A.01.000658    | Jam, marmalade and other fruit spreads             | Jam                                                | 100 | 100 | 0.05     | 0.04    | 0.09      |
| A.01.000683    | Other fruit products (excluding beverages)         | Mixed dried fruits                                 | 80  | 120 | 0.06     | 0.06    | 0.12      |
| A.01.000687    | Other fruit products (excluding beverages)         | Fruit cocktail                                     | 80  | 120 | 0.06     | 0.06    | 0.12      |
| A.01.000688    | Other fruit products (excluding beverages)         | Fruit, canned                                      | 80  | 120 | 0.06     | 0.06    | 0.12      |
| A.01.000723    | Other fruit products (excluding beverages)         | Fruit in vinegar, oil, or brine                    | 80  | 120 | 0.06     | 0.06    | 0.12      |
| A.01.000725    | Other fruit products (excluding beverages)         | Fruit fillings for pastries                        | 80  | 120 | 0.06     | 0.06    | 0.12      |
| A.01.000874    | Meat imitates                                      | Textured soy protein                               | 50  | 90  | 0.02     | 0.02    | 0.04      |
| A.01.000875    | Meat imitates                                      | Quorn (mycoprotein)                                | 50  | 90  | 0.02     | 0.02    | 0.04      |
| A.01.000910    | Fish products                                      | Fish products                                      | 50  | 100 | 0.01     | 0       | 0.01      |
| A.01.000911    | Fish products                                      | Fish balls                                         | 50  | 100 | 0.01     | 0       | 0.01      |
| A.01.000912    | Fish products                                      | Fishcakes                                          | 50  | 100 | 0.01     | 0       | 0.01      |
| A.01.000913    | Fish products                                      | Fish fingers                                       | 50  | 100 | 0.01     | 0       | 0.01      |
| A.01.000914    | Fish products                                      | Fish paste                                         | 50  | 100 | 0.01     | 0       | 0.01      |
| A.01.000915    | Fish products                                      | Fish pâté                                          | 50  | 100 | 0.01     | 0       | 0.01      |
| A.01.000917    | Fish offal                                         | Fish roe                                           | 50  | 100 | 0.01     | 0       | 0.01      |
| A.01.000963    | Milk based beverages                               | Milk based beverages                               | 25  | 120 | 0.15     | 0.11    | 0.26      |
| A.01.000964    | Milk based beverages                               | Flavoured milk                                     | 25  | 120 | 0.01     | 0.08    | 0.09      |
| A.01.000968    | Milk based beverages                               | Milksakes                                          | 25  | 120 | 0.25     | 0.15    | 0.4       |
| A.01.000981    | Concentrated milk                                  | Dried milk                                         | 50  | 100 | 0        | 0       | 0         |
| A.01.001001    | Cream and cream products                           | Cream                                              | 50  | 100 | 0.08     | 0       | 0.08      |
| A.01.001021    | Cream and cream products                           | Crème fraîche                                      | 50  | 100 | 0.08     | 0       | 0.08      |
| A.01.001027    | Fermented milk products                            | Fermented milk products                            | 50  | 100 | 0.15     | 0.11    | 0.26      |
| A.01.001032    | Fermented milk products                            | Yoghurt, cow milk, with fruit                      | 50  | 100 | 0.15     | 0.11    | 0.26      |
| A.01.001053    | Cheese                                             | Cheese                                             | 50  | 100 | 0        | 0       | 0         |
| A.01.001054    | Cheese                                             | Quark                                              | 50  | 100 | 0.07     | 0.07    | 0.14      |
| A.01.001056    | Cheese                                             | Cheese, processed, sliceable                       | 50  | 100 | 0        | 0       | 0         |
| A.01.001057    | Cheese                                             | Cheese, processed spreadable                       | 50  | 100 | 0        | 0       | 0         |
| A.01.001058    | Cheese                                             | Cheese, processed, with condiments                 | 50  | 100 | 0        | 0       | 0         |
| A.01.001059    | Cheese                                             | Cheese, processed, with ham                        | 50  | 100 | 0        | 0       | 0         |
| A.01.001060    | Cheese                                             | Cheese, processed, with mushrooms                  | 50  | 100 | 0        | 0       | 0         |
| A.01.001061    | Cheese                                             | Cheese, processed, with pepper herbs               | 50  | 100 | 0        | 0       | 0         |
| A.01.001062    | Cheese                                             | Cheese, processed, with walnuts                    | 50  | 100 | 0        | 0       | 0         |
| A.01.001063    | Cheese                                             | Cheese, processed, low fat                         | 50  | 100 | 0        | 0       | 0         |
| A.01.001064    | Cheese                                             | Cheese, processed cheese, plain                    | 50  | 100 | 0        | 0       | 0         |
| A.01.001102    | Cheese                                             | Cheese, Cheddar                                    | 50  | 100 | 0        | 0       | 0         |
| A.01.001103    | Cheese                                             | Cheese, Cheshire                                   | 50  | 100 | 0        | 0       | 0         |
| A.01.001114    | Cheese                                             | Cheese, Double Gloucester                          | 50  | 100 | 0        | 0       | 0         |
| A.01.001156    | Cheese                                             | Cheese, Leicester                                  | 50  | 100 | 0        | 0       | 0         |
| A.01.001167    | Cheese                                             | Cheese, Mimolette                                  | 50  | 100 | 0        | 0       | 0         |
| A.01.001242    | Milk and milk product imitates                     | Imitation cream                                    | 50  | 100 | 0        | 0       | 0         |
| A.01.001243    | Milk and milk product imitates                     | Non dairy coffee creamer                           | 50  | 100 | 0        | 0       | 0         |
| A.01.001248    | Milk and milk product imitates                     | Soya drink                                         | 50  | 100 | 0.01     | 0.04    | 0.05      |
| A.01.001249    | Milk and milk product imitates                     | Soya yoghurt                                       | 50  | 100 | 0.17     | 0.17    | 0.34      |
| A.01.001298    | Chocolate (Cocoa) products                         | Chocolate bar                                      | 50  | 80  | 0.03     | 0.03    | 0.06      |
| A.01.001299    | Chocolate (Cocoa) products                         | Chocolate, cream                                   | 50  | 80  | 0.03     | 0.03    | 0.06      |
| A.01.001300    | Chocolate (Cocoa) products                         | Chocolate with nuts or fruits                      | 50  | 80  | 0.03     | 0.03    | 0.06      |
| A.01.001301    | Chocolate (Cocoa) products                         | Chocolate coated confectionery                     | 50  | 80  | 0.03     | 0.03    | 0.06      |
| A.01.001310    | Confectionery (non-chocolate)                      | Confectionery (non-chocolate)                      | 50  | 80  | 0.3      | 0.22    | 0.52      |
| A.01.001311    | Confectionery (non-chocolate)                      | Candies, with sugar                                | 50  | 80  | 0.3      | 0.22    | 0.52      |
| A.01.001312    | Confectionery (non-chocolate)                      | Candies, sugar free                                | 50  | 80  | 0.3      | 0.22    | 0.52      |
| A.01.001313    | Confectionery (non-chocolate)                      | Marzipan                                           | 50  | 80  | 0.3      | 0.22    | 0.52      |
| A.01.001314    | Confectionery (non-chocolate)                      | Caramel, hard                                      | 50  | 80  | 0.3      | 0.22    | 0.52      |
| A.01.001315    | Confectionery (non-chocolate)                      | Caramel, soft                                      | 50  | 80  | 0.3      | 0.22    | 0.52      |
| A.01.001316    | Confectionery (non-chocolate)                      | Toffee                                             | 50  | 80  | 0.3      | 0.22    | 0.52      |
| A.01.001317    | Confectionery (non-chocolate)                      | Fudge                                              | 50  | 80  | 0.3      | 0.22    | 0.52      |
| A.01.001318    | Confectionery (non-chocolate)                      | Dragée, sugar coated                               | 50  | 80  | 0.3      | 0.22    | 0.52      |
| A.01.001319    | Confectionery (non-chocolate)                      | Sugar cotton                                       | 50  | 80  | 0.3      | 0.22    | 0.52      |
| A.01.001320    | Confectionery (non-chocolate)                      | Foamed sugar products (marshmallows)               | 50  | 80  | 0.3      | 0.22    | 0.52      |
| A.01.001321    | Confectionery (non-chocolate)                      | Liquorice candies                                  | 50  | 80  | 0.3      | 0.22    | 0.52      |
| A.01.001322    | Confectionery (non-chocolate)                      | Gum drops                                          | 50  | 80  | 0.3      | 0.22    | 0.52      |
| A.01.001323    | Confectionery (non-chocolate)                      | Jelly candies                                      | 50  | 80  | 0.3      | 0.22    | 0.52      |
| A.01.001324    | Confectionery (non-chocolate)                      | Nougat                                             | 50  | 80  | 0.3      | 0.22    | 0.52      |
| A.01.001325    | Confectionery (non-chocolate)                      | Halva                                              | 50  | 80  | 0.3      | 0.22    | 0.52      |
| A.01.001326    | Confectionery (non-chocolate)                      | Chewing gum with added sugar                       | 50  | 80  | 0.3      | 0.22    | 0.52      |
| A.01.001327    | Confectionery (non-chocolate)                      | Chewing gum without added sugar                    | 50  | 80  | 0.3      | 0.22    | 0.52      |
| A.01.001470    | Non-alcoholic beverages (excepting milk based beve | Non-alcoholic beverages (excepting milk based beve | 25  | 120 | 0.13     | 0.06    | 0.19      |
| A.01.001471    | Soft drinks                                        | Soft drinks                                        | 25  | 120 | 0.13     | 0.06    | 0.19      |
| A.01.001472    | Soft drinks                                        | Soft drink, fruit content                          | 25  | 120 | 0.13     | 0.06    | 0.19      |
| A.01.001494    | Soft drinks                                        | Soft drink, flavoured                              | 25  | 120 | 0.13     | 0.06    | 0.19      |
| A.01.001540    | Beer and beer-like beverage                        | Beer-like beverages (Malt drink)                   | 60  | 60  | 0.04     | 0.02    | 0.06      |
| A.01.001546    | Fortified and liqueur wines (e.g. Vermouth, Sherry | Fortified and liqueur wines (e.g. Vermouth, Sherry | 60  | 60  | 0.06     | 0       | 0.06      |
| A.01.001547    | Fortified and liqueur wines (e.g. Vermouth, Sherry | Vermouth                                           | 60  | 60  | 0.06     | 0       | 0.06      |
| A.01.001548    | Fortified and liqueur wines (e.g. Vermouth, Sherry | Sherry                                             | 60  | 60  | 0.06     | 0       | 0.06      |

| FoodEx L3 Code | Foodex L2                                          | Foodex L3                                          | Typ | Max | E163 Occ | CFS Occ | Total Occ |
|----------------|----------------------------------------------------|----------------------------------------------------|-----|-----|----------|---------|-----------|
| A.01.001549    | Wine-like drinks (e.g. Cider, Perry)               | Wine-like drinks (e.g. Cider, Perry)               | 60  | 60  | 0.4      | 0.11    | 0.51      |
| A.01.001550    | Wine-like drinks (e.g. Cider, Perry)               | Cider                                              | 60  | 60  | 0.4      | 0.11    | 0.51      |
| A.01.001551    | Wine-like drinks (e.g. Cider, Perry)               | Perry                                              | 60  | 60  | 0.4      | 0.11    | 0.51      |
| A.01.001552    | Liqueur                                            | Liqueur                                            | 60  | 60  | 0.02     | 0.02    | 0.04      |
| A.01.001553    | Liqueur                                            | Fruit liqueur                                      | 60  | 60  | 0.02     | 0.02    | 0.04      |
| A.01.001554    | Liqueur                                            | Herb liqueur                                       | 60  | 60  | 0.02     | 0.02    | 0.04      |
| A.01.001556    | Liqueur                                            | Coffee liqueur                                     | 60  | 60  | 0.02     | 0.02    | 0.04      |
| A.01.001557    | Liqueur                                            | Egg liqueur                                        | 60  | 60  | 0.02     | 0.02    | 0.04      |
| A.01.001558    | Liqueur                                            | Cocos cream liqueur                                | 60  | 60  | 0.02     | 0.02    | 0.04      |
| A.01.001559    | Liqueur                                            | Cream liqueur                                      | 60  | 60  | 0.02     | 0.02    | 0.04      |
| A.01.001561    | Spirits                                            | Spirits                                            | 60  | 60  | 0        | 0       | 0         |
| A.01.001562    | Spirits                                            | Brandy                                             | 60  | 60  | 0        | 0       | 0         |
| A.01.001563    | Spirits                                            | Whisky                                             | 60  | 60  | 0        | 0       | 0         |
| A.01.001564    | Spirits                                            | Gin                                                | 60  | 60  | 0        | 0       | 0         |
| A.01.001565    | Spirits                                            | Vodka and vodka-like spirits                       | 60  | 60  | 0.03     | 0       | 0.03      |
| A.01.001566    | Spirits                                            | Rum                                                | 60  | 60  | 0        | 0       | 0         |
| A.01.001567    | Spirits                                            | Spirits made from fruits                           | 60  | 60  | 0        | 0       | 0         |
| A.01.001568    | Spirits                                            | Spirits made from vegetables (Tequila)             | 60  | 60  | 0        | 0       | 0         |
| A.01.001569    | Alcoholic mixed drinks                             | Alcoholic mixed drinks                             | 60  | 60  | 0.1      | 0.04    | 0.14      |
| A.01.001570    | Alcoholic mixed drinks                             | Cocktail drink                                     | 60  | 60  | 0.1      | 0.04    | 0.14      |
| A.01.001571    | Alcoholic mixed drinks                             | Punch                                              | 60  | 60  | 0.1      | 0.04    | 0.14      |
| A.01.001572    | Alcoholic mixed drinks                             | Alcopop                                            | 60  | 60  | 0.1      | 0.04    | 0.14      |
| A.01.001632    | Seasoning or extracts                              | Seasoning or extracts                              | 50  | 90  | 0.01     | 0.01    | 0.02      |
| A.01.001640    | Seasoning or extracts                              | Stock cubes (bouillon cube)                        | 50  | 90  | 0.01     | 0.01    | 0.02      |
| A.01.001641    | Seasoning or extracts                              | Gravy thickener                                    | 50  | 90  | 0.01     | 0.01    | 0.02      |
| A.01.001642    | Seasoning or extracts                              | Gravy browning                                     | 50  | 90  | 0.01     | 0.01    | 0.02      |
| A.01.001643    | Seasoning or extracts                              | Gravy instant granules                             | 50  | 90  | 0.01     | 0.01    | 0.02      |
| A.01.001644    | Seasoning or extracts                              | Vegetable extracts                                 | 50  | 90  | 0.01     | 0.01    | 0.02      |
| A.01.001645    | Seasoning or extracts                              | Meat extract                                       | 50  | 90  | 0.01     | 0.01    | 0.02      |
| A.01.001646    | Seasoning or extracts                              | Malt extract                                       | 50  | 90  | 0.01     | 0.01    | 0.02      |
| A.01.001647    | Seasoning or extracts                              | Yeast extract                                      | 50  | 90  | 0.01     | 0.01    | 0.02      |
| A.01.001649    | Condiment                                          | Condiment                                          | 50  | 90  | 0.01     | 0.01    | 0.02      |
| A.01.001650    | Condiment                                          | Mustard, sweet                                     | 50  | 90  | 0.01     | 0.01    | 0.02      |
| A.01.001651    | Condiment                                          | Mustard, mild                                      | 50  | 90  | 0.01     | 0.01    | 0.02      |
| A.01.001652    | Condiment                                          | Mustard, hot                                       | 50  | 90  | 0.01     | 0.01    | 0.02      |
| A.01.001653    | Condiment                                          | Vinegar, wine                                      | 50  | 90  | 0.01     | 0.01    | 0.02      |
| A.01.001654    | Condiment                                          | Vinegar, apple                                     | 50  | 90  | 0.01     | 0.01    | 0.02      |
| A.01.001655    | Condiment                                          | Tomato ketchup                                     | 50  | 90  | 0.01     | 0.01    | 0.02      |
| A.01.001656    | Condiment                                          | Barbecue sauce                                     | 50  | 90  | 0.01     | 0.01    | 0.02      |
| A.01.001657    | Condiment                                          | Tabasco sauce                                      | 50  | 90  | 0.01     | 0.01    | 0.02      |
| A.01.001658    | Condiment                                          | Horseradish sauce                                  | 50  | 90  | 0.01     | 0.01    | 0.02      |
| A.01.001659    | Condiment                                          | Mint sauce                                         | 50  | 90  | 0.01     | 0.01    | 0.02      |
| A.01.001660    | Condiment                                          | Soy sauce                                          | 50  | 90  | 0.01     | 0.01    | 0.02      |
| A.01.001661    | Condiment                                          | Curry sauce                                        | 50  | 90  | 0.01     | 0.01    | 0.02      |
| A.01.001662    | Condiment                                          | Salsa                                              | 50  | 90  | 0.01     | 0.01    | 0.02      |
| A.01.001663    | Condiment                                          | Tartar sauce                                       | 50  | 90  | 0.01     | 0.01    | 0.02      |
| A.01.001664    | Condiment                                          | Mixed condiment                                    | 50  | 90  | 0.01     | 0.01    | 0.02      |
| A.01.001672    | Chutney and pickles                                | Chutney and pickles                                | 50  | 90  | 0.01     | 0.01    | 0.02      |
| A.01.001673    | Chutney and pickles                                | Tomato chutney                                     | 50  | 90  | 0.01     | 0.01    | 0.02      |
| A.01.001674    | Chutney and pickles                                | Apple chutney                                      | 50  | 90  | 0.01     | 0.01    | 0.02      |
| A.01.001676    | Chutney and pickles                                | Mango chutney                                      | 50  | 90  | 0.01     | 0.01    | 0.02      |
| A.01.001677    | Chutney and pickles                                | Mixed chutney                                      | 50  | 90  | 0.01     | 0.01    | 0.02      |
| A.01.001678    | Chutney and pickles                                | Piccalilli                                         | 50  | 90  | 0.01     | 0.01    | 0.02      |
| A.01.001679    | Chutney and pickles                                | Chilli pickle                                      | 50  | 90  | 0.01     | 0.01    | 0.02      |
| A.01.001680    | Chutney and pickles                                | Lime pickle                                        | 50  | 90  | 0.01     | 0.01    | 0.02      |
| A.01.001681    | Chutney and pickles                                | Mango pickle                                       | 50  | 90  | 0.01     | 0.01    | 0.02      |
| A.01.001682    | Chutney and pickles                                | Mixed pickle                                       | 50  | 90  | 0.01     | 0.01    | 0.02      |
| A.01.001683    | Chutney and pickles                                | Relish                                             | 50  | 90  | 0.01     | 0.01    | 0.02      |
| A.01.001684    | Savoury sauces                                     | Savoury sauces                                     | 50  | 90  | 0.01     | 0.01    | 0.02      |
| A.01.001685    | Savoury sauces                                     | White sauce (Bechamel sauce, Cheese sauce)         | 50  | 90  | 0.01     | 0.01    | 0.02      |
| A.01.001686    | Savoury sauces                                     | Brown sauce (Gravy, Lyonnais sauce)                | 50  | 90  | 0.01     | 0.01    | 0.02      |
| A.01.001687    | Savoury sauces                                     | Cream sauce                                        | 50  | 90  | 0.01     | 0.01    | 0.02      |
| A.01.001688    | Savoury sauces                                     | Butter sauce                                       | 50  | 90  | 0.01     | 0.01    | 0.02      |
| A.01.001689    | Savoury sauces                                     | Emulsion sauce (Hollandaise sauce)                 | 50  | 90  | 0.01     | 0.01    | 0.02      |
| A.01.001690    | Savoury sauces                                     | Oil-based sauce (Pesto, Aioli sauce)               | 50  | 90  | 0.01     | 0.01    | 0.02      |
| A.01.001691    | Savoury sauces                                     | Alcoholic sauce                                    | 50  | 90  | 0.01     | 0.01    | 0.02      |
| A.01.001692    | Savoury sauces                                     | Meat sauce                                         | 50  | 90  | 0.01     | 0.01    | 0.02      |
| A.01.001693    | Savoury sauces                                     | Fish sauce                                         | 50  | 90  | 0.01     | 0.01    | 0.02      |
| A.01.001694    | Savoury sauces                                     | Vegetable sauce                                    | 50  | 90  | 0.01     | 0.01    | 0.02      |
| A.01.001748    | Products for special nutritional use               | Products for special nutritional use               | 50  | 100 | 0.04     | 0.05    | 0.09      |
| A.01.001749    | Food for weight reduction                          | Food for weight reduction                          | 50  | 100 | 0.04     | 0.05    | 0.09      |
| A.01.001750    | Food for weight reduction                          | Products presented as a replacement for the whole  | 50  | 100 | 0.04     | 0.05    | 0.09      |
| A.01.001751    | Food for weight reduction                          | Products presented as a replacement for one or mor | 50  | 100 | 0.04     | 0.05    | 0.09      |
| A.01.001788    | Medical food (are specially formulated and intende | Oral rehydration products                          | 25  | 120 | 0.2      | 0.2     | 0.4       |
| A.01.001856    | Ready to eat soups                                 | Ready to eat soups                                 | 50  | 90  | 0.02     | 0.02    | 0.04      |
| A.01.001857    | Ready to eat soups                                 | Vegetable/herb soup                                | 50  | 90  | 0.02     | 0.02    | 0.04      |
| A.01.001858    | Ready to eat soups                                 | Grain soup                                         | 50  | 90  | 0.02     | 0.02    | 0.04      |
| A.01.001859    | Ready to eat soups                                 | Potato soup                                        | 50  | 90  | 0.02     | 0.02    | 0.04      |
| A.01.001860    | Ready to eat soups                                 | Meat/poultry soup                                  | 50  | 90  | 0.02     | 0.02    | 0.04      |
| A.01.001861    | Ready to eat soups                                 | Fish soup                                          | 50  | 90  | 0.02     | 0.02    | 0.04      |
| A.01.001862    | Ready to eat soups                                 | Legume (beans) soup                                | 50  | 90  | 0.02     | 0.02    | 0.04      |
| A.01.001863    | Ready to eat soups                                 | Milk product/egg soup                              | 50  | 90  | 0.02     | 0.02    | 0.04      |
| A.01.001864    | Ready to eat soups                                 | Mushroom soup                                      | 50  | 90  | 0.02     | 0.02    | 0.04      |
| A.01.001865    | Ready to eat soups                                 | Fruit soup                                         | 50  | 90  | 0.02     | 0.02    | 0.04      |
| A.01.001866    | Prepared salads                                    | Prepared salads                                    | 50  | 90  | 0.02     | 0.02    | 0.04      |
| A.01.001867    | Prepared salads                                    | Prepared green salad                               | 50  | 90  | 0.02     | 0.02    | 0.04      |
| A.01.001868    | Prepared salads                                    | Prepared mixed vegetable salad                     | 50  | 90  | 0.02     | 0.02    | 0.04      |
| A.01.001869    | Prepared salads                                    | Prepared potato salad                              | 50  | 90  | 0.02     | 0.02    | 0.04      |
| A.01.001870    | Prepared salads                                    | Prepared pasta salad                               | 50  | 90  | 0.02     | 0.02    | 0.04      |
| A.01.001871    | Prepared salads                                    | Prepared rice salad                                | 50  | 90  | 0.02     | 0.02    | 0.04      |
| A.01.001872    | Prepared salads                                    | Prepared legume (beans) salad                      | 50  | 90  | 0.02     | 0.02    | 0.04      |
| A.01.001873    | Prepared salads                                    | Prepared nut salad                                 | 50  | 90  | 0.02     | 0.02    | 0.04      |
| A.01.001874    | Prepared salads                                    | Prepared meat salad                                | 50  | 90  | 0.02     | 0.02    | 0.04      |
| A.01.001875    | Prepared salads                                    | Prepared fish salad                                | 50  | 90  | 0.02     | 0.02    | 0.04      |
| A.01.001876    | Prepared salads                                    | Prepared mixed egg/meat/fish/vegetable salad       | 50  | 90  | 0.02     | 0.02    | 0.04      |
| A.01.001877    | Snacks, desserts, and other foods                  | Snacks, desserts, and other foods                  | 150 | 300 | 0.06     | 0.04    | 0.1       |
| A.01.001878    | Snack food                                         | Snack food                                         | 150 | 300 | 0.06     | 0.04    | 0.1       |
| A.01.001879    | Snack food                                         | Potato crisps                                      | 150 | 300 | 0.06     | 0.04    | 0.1       |
| A.01.001880    | Snack food                                         | Corn chips                                         | 150 | 300 | 0.06     | 0.04    | 0.1       |
| A.01.001881    | Snack food                                         | Tortilla chips                                     | 150 | 300 | 0.06     | 0.04    | 0.1       |
| A.01.001882    | Snack food                                         | Corn curls                                         | 150 | 300 | 0.06     | 0.04    | 0.1       |

| FoodEx L3 Code | Foodex L2         | Foodex L3                 | Typ | Max | E163 Occ | CFS Occ | Total Occ |
|----------------|-------------------|---------------------------|-----|-----|----------|---------|-----------|
| A.01.001883    | Snack food        | Popcorn                   | 150 | 300 | 0.06     | 0.04    | 0.1       |
| A.01.001884    | Snack food        | Pretzels                  | 150 | 300 | 0.06     | 0.04    | 0.1       |
| A.01.001885    | Snack food        | Fish-based snacks         | 150 | 300 | 0.06     | 0.04    | 0.1       |
| A.01.001886    | Snack food        | Seafood chips             | 150 | 300 | 0.06     | 0.04    | 0.1       |
| A.01.001887    | Snack food        | Cheese puffs              | 150 | 300 | 0.06     | 0.04    | 0.1       |
| A.01.001888    | Ices and desserts | Ices and desserts         | 50  | 130 | 0.09     | 0.06    | 0.15      |
| A.01.001889    | Ices and desserts | Ice cream, milk-based     | 50  | 130 | 0.09     | 0.06    | 0.15      |
| A.01.001890    | Ices and desserts | Ice cream, not milk-based | 50  | 130 | 0.06     | 0.11    | 0.17      |
| A.01.001891    | Ices and desserts | Starchy pudding           | 50  | 100 | 0.13     | 0.08    | 0.21      |
| A.01.001892    | Ices and desserts | Custard                   | 50  | 100 | 0.13     | 0.08    | 0.21      |
| A.01.001893    | Ices and desserts | Sorbet                    | 50  | 100 | 0.25     | 0.13    | 0.38      |
| A.01.001894    | Ices and desserts | Gelatine dessert          | 50  | 100 | 0.13     | 0.08    | 0.21      |
| A.01.001895    | Ices and desserts | Granita                   | 50  | 100 | 0.13     | 0.08    | 0.21      |
