# Supplementary material
Source: publisher figshare collection journal article supplement (https://tandf.figshare.com/articles/dataset/_/3395740)
Supplement: Supplementary file 3 [file 1]

COMPREHENSIVE EUROPEAN DIETARY EXPOSURE MODEL

|              |         |
|--------------|---------|
| Anthocyanins | Natural |
|--------------|---------|

mg/kg bw/day

P95 consumers < 60 removed

INFANTS

| Country  | Survey                                                                    | Population average | Total High Level Intake |          |          |
|----------|---------------------------------------------------------------------------|--------------------|-------------------------|----------|----------|
|          |                                                                           |                    | Method A                | Method B | Method C |
| Bulgaria | NUTRICHILD                                                                | 0.38               | 0.96                    | 0.96     | 0.96     |
| Denmark  | Danish National Dietary survey among infants and young children 2006-2007 | 0.11               | 0.33                    | 0.33     | 0.33     |
| Finland  | Diabetes Prediction and Prevention Nutrition Study (DIPP) 2001-2009       | 2.72               | 10.13                   | 10.13    | 10.13    |
| Germany  | Consumption Survey of Food Intake among Infants and Young Children        | 0.20               | 0.63                    | 0.63     | 0.63     |
| Italy    | Italian National Food Consumption Survey INRAN-SCAI 2005-06               | 0.15               | 0.15                    | 0.15     | 0.15     |
| UK       | Diet and Nutrition Survey of Infants and Young Children, 2011             | 0.63               | 16.07                   | 16.07    | 16.07    |
| Min      |                                                                           | 0.11               | 0.15                    | 0.15     | 0.15     |
| Max      |                                                                           | 2.72               | 16.07                   | 16.07    | 16.07    |

| N   | %   | Highest contributor                       |
|-----|-----|-------------------------------------------|
| 116 | 14% | Apple (Malus domesticus)                  |
| 87  | 11% | Peaches (Prunus persica)                  |
| 240 | 48% | Raspberries (Rubus idaeus)                |
| 69  | 43% | Apple (Malus domesticus)                  |
| 0   | 0%  | Insufficient consumers                    |
| 89  | 7%  | Bilberry or whortleberry (Vaccinium spp.) |

TODDLERS

| Country     | Survey                                                                                     | Population average | Total High Level Intake |          |          |
|-------------|--------------------------------------------------------------------------------------------|--------------------|-------------------------|----------|----------|
|             |                                                                                            |                    | Method A                | Method B | Method C |
| Belgium     | Regional Flanders                                                                          | 0.19               | 0.19                    | 0.19     | 0.19     |
| Bulgaria    | NUTRICHILD                                                                                 | 1.77               | 11.39                   | 11.39    | 11.39    |
| Denmark     | Danish National Dietary survey among infants and young children 2006-2007                  | 0.18               | 2.00                    | 2.00     | 2.00     |
| Finland     | Diabetes Prediction and Prevention Nutrition Study (DIPP) 2001-2009                        | 3.48               | 12.09                   | 12.09    | 12.09    |
|             | Diabetes Prediction and Prevention Nutrition Study (DIPP) 2003 -2006                       | 4.00               | 12.83                   | 12.83    | 12.83    |
| Germany     | Consumption Survey of Food Intake among Infants and Young Children                         | 0.40               | 0.68                    | 0.68     | 0.68     |
| Germany     | Dortmund Nutritional and Anthropometrical Longitudinally Designed (DONALD) Study 2006-2008 | 0.39               | 0.78                    | 0.78     | 0.78     |
| Italy       | Italian National Food Consumption Survey INRAN-SCAI 2005-06                                | 0.58               | 0.58                    | 0.58     | 0.58     |
| Netherlands | DNFCS-Young-Children                                                                       | 0.26               | 0.63                    | 0.63     | 0.63     |
| Spain       | Food patterns of Spanish schoolchildren and adolescents                                    | 0.19               | 0.19                    | 0.19     | 0.19     |
| UK          | Diet and Nutrition Survey of Infants and Young Children, 2011                              | 1.15               | 17.12                   | 17.12    | 17.12    |
|             | National Diet and Nutrition Survey - Years 1-3                                             | 0.71               | 0.90                    | 0.90     | 0.90     |
| Min         |                                                                                            | 0.18               | 0.19                    | 0.19     | 0.19     |
| Max         |                                                                                            | 4.00               | 17.12                   | 17.12    | 17.12    |

| N   | %   | Highest contributor                                |
|-----|-----|----------------------------------------------------|
| 0   | 0%  | Insufficient consumers                             |
| 77  | 18% | Sweet cherry (Prunus avium)                        |
| 77  | 8%  | Raspberries (Rubus idaeus)                         |
| 248 | 50% | Currants (red, black and white) (Ribes nigrum, Rib |
| 248 | 50% | Blueberries (Vaccinium corymbosum)                 |
| 290 | 83% | Apple (Malus domesticus)                           |
| 160 | 61% | Apple (Malus domesticus)                           |
| 0   | 0%  | Insufficient consumers                             |
| 178 | 55% | Apple (Malus domesticus)                           |
| 0   | 0%  | Insufficient consumers                             |
| 142 | 11% | Bilberry or whortleberry (Vaccinium spp.)          |
| 117 | 63% | Apple (Malus domesticus)                           |

OTHER CHILDREN

| Country        | Survey                                                                                     | Population average | Total High Level Intake |          |          |
|----------------|--------------------------------------------------------------------------------------------|--------------------|-------------------------|----------|----------|
|                |                                                                                            |                    | Method A                | Method B | Method C |
| Austria        | Austrian Study on Nutritional Status 2010-12 - Children                                    | 0.14               | 0.36                    | 0.36     | 0.36     |
| Belgium        | Regional Flanders                                                                          | 0.15               | 0.47                    | 0.47     | 0.47     |
| Bulgaria       | NUTRICHILD                                                                                 | 1.78               | 12.95                   | 12.95    | 12.95    |
| Czech Republic | Czech National Food Consumption Survey                                                     | 0.68               | 0.94                    | 0.94     | 0.94     |
| Denmark        | Danish Dietary Survey                                                                      | 0.19               | 0.42                    | 0.42     | 0.42     |
|                | The Danish National Dietary survey 2005-2008                                               | 0.26               | 1.19                    | 1.19     | 1.19     |
| Finland        | Diabetes Prediction and Prevention Nutrition Study (DIPP) 2001-2009                        | 1.55               | 8.11                    | 8.11     | 8.11     |
|                | Diabetes Prediction and Prevention Nutrition Study (DIPP) 2003 -2006                       | 2.38               | 11.20                   | 11.20    | 11.20    |
| France         | Individual and national study on food consumption 2                                        | 0.25               | 0.66                    | 0.66     | 0.66     |
| Germany        | Consumption Survey of Food Intake among Infants and Young Children                         | 0.33               | 0.57                    | 0.57     | 0.57     |
|                | Dortmund Nutritional and Anthropometrical Longitudinally Designed (DONALD) Study 2006-2008 | 0.53               | 0.78                    | 0.78     | 0.78     |
|                | Eating Study as a KiGGS Module (EsKiMo)                                                    | 0.55               | 0.85                    | 0.85     | 0.85     |
| Greece         | Regional Crete                                                                             | 0.13               | 0.39                    | 0.39     | 0.39     |
| Italy          | Italian National Food Consumption Survey INRAN-SCAI 2005-06                                | 0.34               | 0.73                    | 0.73     | 0.73     |
| Latvia         | National Dietary Survey                                                                    | 0.66               | 0.66                    | 0.66     | 0.66     |
| Netherlands    | DNFCS-Young-Children                                                                       | 0.19               | 0.51                    | 0.51     | 0.51     |

| N   | %   | Highest contributor                         |
|-----|-----|---------------------------------------------|
| 72  | 56% | Apple (Malus domesticus)                    |
| 369 | 59% | Apple (Malus domesticus)                    |
| 102 | 24% | Sweet cherry (Prunus avium)                 |
| 259 | 67% | Apple (Malus domesticus)                    |
| 405 | 83% | Apple (Malus domesticus)                    |
| 162 | 54% | Raspberries (Rubus idaeus)                  |
| 204 | 27% | Raspberries (Rubus idaeus)                  |
| 120 | 13% | Juice, Blackcurrant                         |
| 103 | 21% | Aubergines (egg plants) (Solanum melongena) |
| 245 | 84% | Apple (Malus domesticus)                    |
| 531 | 80% | Apple (Malus domesticus)                    |
| 616 | 74% | Apple (Malus domesticus)                    |
| 348 | 42% | Apple (Malus domesticus)                    |
| 102 | 53% | Apple (Malus domesticus)                    |
| 0   | 0%  | Insufficient consumers                      |
| 563 | 59% | Apple (Malus domesticus)                    |

| Country | Survey                                                  | Population average | Total High Level Intake |          |          |
|---------|---------------------------------------------------------|--------------------|-------------------------|----------|----------|
|         |                                                         |                    | Method A                | Method B | Method C |
| Spain   | Dutch National food consumption survey 2007 - 2010      | 0.17               | 0.41                    | 0.41     | 0.41     |
|         | Encuesta de nutrición 2005                              | 0.09               | 0.43                    | 0.43     | 0.43     |
|         | Food patterns of Spanish schoolchildren and adolescents | 0.81               | 0.81                    | 0.81     | 0.81     |
| Sweden  | National Food Administration                            | 0.22               | 0.53                    | 0.53     | 0.53     |
| UK      | National Diet and Nutrition Survey - Years 1-3          | 0.40               | 0.59                    | 0.59     | 0.59     |
|         |                                                         | Minimum:           | 0.09                    | 0.36     | 0.36     |
|         |                                                         | Maximum:           | 2.38                    | 12.95    | 12.95    |

| N   | %   | Highest contributor             |
|-----|-----|---------------------------------|
| 67  | 15% | Jam                             |
| 138 | 35% | Apple (Malus domesticus)        |
| 138 | 35% | Grains and grain-based products |
| 930 | 63% | Apple (Malus domesticus)        |
| 443 | 68% | Apple (Malus domesticus)        |

ADOLESCENTS

| Country        | Survey                                                      | Population average | Total High Level Intake |          |          |
|----------------|-------------------------------------------------------------|--------------------|-------------------------|----------|----------|
|                |                                                             |                    | Method A                | Method B | Method C |
| Austria        | Austrian Study on Nutritional Status 2010-12 - Children     | 0.19               | 0.37                    | 0.37     | 0.37     |
| Belgium        | Diet National 2004                                          | 0.08               | 0.25                    | 0.25     | 0.25     |
| Cyprus         | Childhealth                                                 | 0.05               | 0.21                    | 0.21     | 0.21     |
| Czech Republic | Czech National Food Consumption Survey                      | 0.34               | 0.56                    | 0.56     | 0.56     |
| Denmark        | Danish Dietary Survey                                       | 0.10               | 0.22                    | 0.22     | 0.22     |
|                | The Danish National Dietary survey 2005-2008                | 0.12               | 0.82                    | 0.82     | 0.82     |
| Finland        | Nutrition and wellbeing of secondary school pupils          | 0.58               | 3.21                    | 3.21     | 3.21     |
| France         | Individual and national study on food consumption 2         | 0.12               | 0.41                    | 0.41     | 0.41     |
| Germany        | National Nutrition Survey II                                | 0.37               | 0.62                    | 0.62     | 0.62     |
|                | Eating Study as a KiGGS Module (EsKiMo)                     | 0.15               | 0.39                    | 0.39     | 0.39     |
| Italy          | Italian National Food Consumption Survey INRAN-SCAI 2005-06 | 0.23               | 0.40                    | 0.40     | 0.40     |
| Latvia         | National Dietary Survey                                     | 0.45               | 0.76                    | 0.76     | 0.76     |
| Netherlands    | Dutch National food consumption survey 2007 - 2010          | 0.08               | 0.24                    | 0.24     | 0.24     |
|                | Encuesta de nutrición 2005                                  | 0.07               | 0.31                    | 0.31     | 0.31     |
| Spain          | Food patterns of Spanish schoolchildren and adolescents     | 0.34               | 0.34                    | 0.34     | 0.34     |
|                | Spanish Agency for Food Safety (AESAN) - FIAB Survey        | 0.16               | 0.16                    | 0.16     | 0.16     |
| Sweden         | National Food Administration                                | 0.08               | 0.29                    | 0.29     | 0.29     |
| UK             | National Diet and Nutrition Survey - Years 1-3              | 0.15               | 0.27                    | 0.27     | 0.27     |
| Min            |                                                             | 0.05               | 0.16                    | 0.16     | 0.16     |
| Max            |                                                             | 0.58               | 3.21                    | 3.21     | 3.21     |

| N   | %   | Highest contributor                         |
|-----|-----|---------------------------------------------|
| 92  | 39% | Apple (Malus domesticus)                    |
| 162 | 28% | Apple (Malus domesticus)                    |
| 127 | 42% | Apple (Malus domesticus)                    |
| 174 | 58% | Apple (Malus domesticus)                    |
| 338 | 71% | Apple (Malus domesticus)                    |
| 166 | 44% | Raspberries (Rubus idaeus)                  |
| 77  | 25% | Berries and small fruits                    |
| 166 | 44% | Aubergines (egg plants) (Solanum melongena) |
| 77  | 25% | Apple (Malus domesticus)                    |
| 374 | 37% | Apple (Malus domesticus)                    |
| 104 | 42% | Apple (Malus domesticus)                    |
| 169 | 37% | Apple (Malus domesticus)                    |
| 407 | 36% | Apple (Malus domesticus)                    |
| 159 | 24% | Apple (Malus domesticus)                    |
| 0   | 0%  | Insufficient consumers                      |
| 0   | 0%  | Insufficient consumers                      |
| 396 | 39% | Apple (Malus domesticus)                    |
| 293 | 44% | Apple (Malus domesticus)                    |

ADULTS

| Country        | Survey                                                      | Population average | Total High Level Intake |          |          |
|----------------|-------------------------------------------------------------|--------------------|-------------------------|----------|----------|
|                |                                                             |                    | Method A                | Method B | Method C |
| Austria        | Austrian Study on Nutritional Status 2010-12 - Adults       | 0.24               | 0.84                    | 0.84     | 0.84     |
| Belgium        | Diet National 2004                                          | 0.34               | 2.33                    | 2.33     | 2.33     |
| Czech Republic | Czech National Food Consumption Survey                      | 0.23               | 2.46                    | 2.46     | 2.46     |
| Denmark        | Danish Dietary Survey                                       | 0.53               | 2.00                    | 2.00     | 2.00     |
|                | The Danish National Dietary survey 2005-2008                | 0.50               | 2.03                    | 2.03     | 2.03     |
| Finland        | National FINDIET 2012 Survey                                | 0.95               | 7.39                    | 7.39     | 7.39     |
|                | National Findiet Surveys                                    | 0.67               | 5.81                    | 5.81     | 5.81     |
| France         | Individual and national study on food consumption 2         | 0.41               | 3.46                    | 3.46     | 3.46     |
| Germany        | National Nutrition Survey II                                | 0.39               | 8.90                    | 8.90     | 8.90     |
| Hungary        | National Repr Surv                                          | 0.14               | 1.81                    | 1.81     | 1.81     |
| Ireland        | National Adult Nutrition Survey                             | 0.22               | 1.83                    | 1.83     | 1.83     |
|                | North/South Ireland Food Consumption Survey                 | 0.12               | 1.06                    | 1.06     | 1.06     |
| Italy          | Italian National Food Consumption Survey INRAN-SCAI 2005-06 | 0.49               | 2.03                    | 2.03     | 2.03     |
| Latvia         | National Dietary Survey                                     | 0.31               | 0.52                    | 0.52     | 0.52     |
| Netherlands    | Dutch National Dietary Survey 2003                          | 0.11               | 2.20                    | 2.20     | 2.20     |
|                | Dutch National food consumption survey 2007 - 2010          | 0.22               | 2.47                    | 2.47     | 2.47     |
| Romania        | Dieta Pilot Adults                                          | 0.32               | 1.02                    | 1.02     | 1.02     |
| Spain          | Spanish Agency for Food Safety (AESAN) - FIAB Survey        | 0.30               | 2.10                    | 2.10     | 2.10     |
|                | Spanish Agency for Food Safety (AESAN) Survey               | 0.31               | 2.01                    | 2.01     | 2.01     |

| N    | %   | Highest contributor                                |
|------|-----|----------------------------------------------------|
| 71   | 23% | Wine                                               |
| 300  | 23% | Wine, red                                          |
| 127  | 8%  | Wine, red                                          |
| 1754 | 62% | Wine, red                                          |
| 974  | 56% | Wine, red                                          |
| 134  | 9%  | Blueberries (Vaccinium corymbosum)                 |
| 82   | 6%  | Berries and small fruits                           |
| 91   | 4%  | Sweet cherry (Prunus avium)                        |
| 74   | 1%  | Currants (red, black and white) (Ribes nigrum, Rib |
| 78   | 7%  | Wine, red                                          |
| 290  | 23% | Wine, red                                          |
| 230  | 24% | Wine, red                                          |
| 1110 | 48% | Wine, red                                          |
| 372  | 29% | Apple (Malus domesticus)                           |
| 64   | 9%  | Wine, red                                          |
| 261  | 13% | Wine, red                                          |
| 542  | 43% | Aubergines (egg plants) (Solanum melongena)        |
| 71   | 7%  | Sweet cherry (Prunus avium)                        |
| 63   | 15% | Wine, red                                          |

| Country | Survey                                                     | Population average | Total High Level Intake |          |          |
|---------|------------------------------------------------------------|--------------------|-------------------------|----------|----------|
|         |                                                            |                    | Method A                | Method B | Method C |
| Sweden  | Swedish National Dietary Survey - RIKSMATEN 1997-98        | 0.42               | 4.09                    | 4.09     | 4.09     |
|         | Swedish National Dietary Survey - Riksmaten adults 2010-11 | 0.37               | 4.75                    | 4.75     | 4.75     |
| UK      | National Diet and Nutrition Survey                         | 0.21               | 1.93                    | 1.93     | 1.93     |
|         | National Diet and Nutrition Survey - Years 1-3             | 0.29               | 3.95                    | 3.95     | 3.95     |
| Min     |                                                            | 0.11               | 0.52                    | 0.52     | 0.52     |
| Max     |                                                            | 0.95               | 8.90                    | 8.90     | 8.90     |

| N   | %   | Highest contributor        |
|-----|-----|----------------------------|
| 247 | 20% | Berries and small fruits   |
| 82  | 6%  | Raspberries (Rubus idaeus) |
| 70  | 4%  | Raspberries (Rubus idaeus) |
| 67  | 5%  | Raspberries (Rubus idaeus) |

ELDERLY

| Country     | Survey                                                      | Population average | Total High Level Intake |          |          |
|-------------|-------------------------------------------------------------|--------------------|-------------------------|----------|----------|
|             |                                                             |                    | Method A                | Method B | Method C |
| Austria     | Austrian Study on Nutritional Status 2010-12 - Adults       | 0.33               | 0.33                    | 0.33     | 0.33     |
| Belgium     | Diet National 2004                                          | 0.42               | 2.41                    | 2.41     | 2.41     |
| Denmark     | Danish Dietary Survey                                       | 0.60               | 2.08                    | 2.08     | 2.08     |
|             | The Danish National Dietary survey 2005-2008                | 0.68               | 2.37                    | 2.37     | 2.37     |
| Finland     | National FINDIET 2012 Survey                                | 1.61               | 8.25                    | 8.25     | 8.25     |
|             | National Findiet Surveys                                    | 1.19               | 4.80                    | 4.80     | 4.80     |
| France      | Individual and national study on food consumption 2         | 0.70               | 2.45                    | 2.45     | 2.45     |
| Germany     | National Nutrition Survey II                                | 0.48               | 2.69                    | 2.69     | 2.69     |
| Hungary     | National Repr Surv                                          | 0.16               | 0.30                    | 0.30     | 0.30     |
| Ireland     | National Adult Nutrition Survey                             | 0.18               | 0.18                    | 0.18     | 0.18     |
| Italy       | Italian National Food Consumption Survey INRAN-SCAI 2005-06 | 0.69               | 2.56                    | 2.56     | 2.56     |
| Netherlands | Dutch National food consumption survey 2007 - 2010          | 0.37               | 0.51                    | 0.51     | 0.51     |
|             | Dutch National Food Consumption Surveys - Older Adults      | 0.40               | 2.11                    | 2.11     | 2.11     |
| Romania     | Dieta Pilot Adults                                          | 0.32               | 0.44                    | 0.44     | 0.44     |
| Sweden      | Swedish National Dietary Survey - Riksmaten adults 2010-11  | 0.56               | 1.96                    | 1.96     | 1.96     |
| UK          | National Diet and Nutrition Survey - Years 1-3              | 0.39               | 0.47                    | 0.47     | 0.47     |
| Min         |                                                             | 0.16               | 0.18                    | 0.18     | 0.18     |
| Max         |                                                             | 1.61               | 8.25                    | 8.25     | 8.25     |

| N   | %   | Highest contributor                       |
|-----|-----|-------------------------------------------|
| 0   | 0%  | Insufficient consumers                    |
| 136 | 27% | Wine, red                                 |
| 191 | 62% | Wine, red                                 |
| 189 | 69% | Wine, red                                 |
| 66  | 14% | Blueberries (Vaccinium corymbosum)        |
| 101 | 24% | Bilberry or whortleberry (Vaccinium spp.) |
| 146 | 55% | Wine, red                                 |
| 349 | 17% | Wine, red                                 |
| 167 | 81% | Apple (Malus domesticus)                  |
| 0   | 0%  | Insufficient consumers                    |
| 159 | 55% | Wine, red                                 |
| 87  | 50% | Apple (Malus domesticus)                  |
| 96  | 33% | Wine, red                                 |
| 66  | 80% | Apple (Malus domesticus)                  |
| 113 | 38% | Wine, red                                 |
| 76  | 46% | Apple (Malus domesticus)                  |

VERY ELDERLY

| Country     | Survey                                                      | Population average | Total High Level Intake |          |          |
|-------------|-------------------------------------------------------------|--------------------|-------------------------|----------|----------|
|             |                                                             |                    | Method A                | Method B | Method C |
| Austria     | Austrian Study on Nutritional Status 2010-12 - Adults       | 0.51               | 0.51                    | 0.51     | 0.51     |
| Belgium     | Diet National 2004                                          | 0.34               | 2.26                    | 2.26     | 2.26     |
| Denmark     | Danish Dietary Survey                                       | 0.60               | 0.60                    | 0.60     | 0.60     |
|             | The Danish National Dietary survey 2005-2008                | 0.93               | 0.93                    | 0.93     | 0.93     |
| France      | Individual and national study on food consumption 2         | 0.66               | 0.66                    | 0.66     | 0.66     |
| Germany     | National Nutrition Survey II                                | 0.48               | 2.24                    | 2.24     | 2.24     |
| Hungary     | National Repr Surv                                          | 0.16               | 0.31                    | 0.31     | 0.31     |
| Ireland     | National Adult Nutrition Survey                             | 0.22               | 0.22                    | 0.22     | 0.22     |
| Italy       | Italian National Food Consumption Survey INRAN-SCAI 2005-06 | 0.59               | 2.46                    | 2.46     | 2.46     |
| Netherlands | Dutch National Food Consumption Surveys - Older Adults      | 0.31               | 2.06                    | 2.06     | 2.06     |
| Romania     | Dieta Pilot Adults                                          | 0.44               | 0.44                    | 0.44     | 0.44     |
| Sweden      | Swedish National Dietary Survey - Riksmaten adults 2010-11  | 0.72               | 0.72                    | 0.72     | 0.72     |
| UK          | National Diet and Nutrition Survey - Years 1-3              | 0.24               | 0.24                    | 0.24     | 0.24     |
| Min         |                                                             | 0.16               | 0.22                    | 0.22     | 0.22     |
| Max         |                                                             | 0.93               | 2.46                    | 2.46     | 2.46     |

| N   | %   | Highest contributor      |
|-----|-----|--------------------------|
| 0   | 0%  | Insufficient consumers   |
| 179 | 25% | Wine, red                |
| 0   | 0%  | Insufficient consumers   |
| 0   | 0%  | Insufficient consumers   |
| 0   | 0%  | Insufficient consumers   |
| 72  | 15% | Wine, red                |
| 61  | 76% | Apple (Malus domesticus) |
| 0   | 0%  | Insufficient consumers   |
| 115 | 50% | Wine, red                |
| 89  | 20% | Wine, red                |
| 0   | 0%  | Insufficient consumers   |
| 0   | 0%  | Insufficient consumers   |
| 0   | 0%  | Insufficient consumers   |

|     |                         |
|-----|-------------------------|
| 0   | Insufficient consumers  |
| 10% | Less than 10% consumers |

## COMPREHENSIVE EUROPEAN DIETARY EXPOSURE MODEL

|              |            |
|--------------|------------|
| Anthocyanins | E163 / CFS |
|--------------|------------|

mg/kg bw/day

P95 consumers &lt; 60 removed

## INFANTS

| Country  | Survey                                                                    | Population average | Total High Level Intake |          |          |
|----------|---------------------------------------------------------------------------|--------------------|-------------------------|----------|----------|
|          |                                                                           |                    | Method A                | Method B | Method C |
| Bulgaria | NUTRICHILD                                                                | 0.10               | 0.68                    | 0.58     | 0.37     |
| Denmark  | Danish National Dietary survey among infants and young children 2006-2007 | 0.32               | 2.18                    | 1.94     | 1.08     |
| Finland  | Diabetes Prediction and Prevention Nutrition Study (DIPP) 2001-2009       | 0.23               | 0.79                    | 0.72     | 0.67     |
| Germany  | Consumption Survey of Food Intake among Infants and Young Children        | 0.32               | 0.81                    | 0.44     | 0.38     |
| Italy    | Italian National Food Consumption Survey INRAN-SCAI 2005-06               | 0.14               | 0.27                    | 0.14     | 0.14     |
| UK       | Diet and Nutrition Survey of Infants and Young Children, 2011             | 0.43               | 2.19                    | 1.78     | 1.55     |
| Min      |                                                                           | 0.10               | 0.27                    | 0.14     | 0.14     |
| Max      |                                                                           | 0.43               | 2.19                    | 1.94     | 1.55     |

| N   | %   | Highest contributor (brand loyal) |
|-----|-----|-----------------------------------|
| 70  | 8%  | Pastries and cakes                |
| 278 | 34% | Yoghurt, cow milk, with fruit     |
| 378 | 76% | Cereal flakes                     |
| 70  | 44% | Biscuits (cookies)                |
| 0   | 0%  | Insufficient consumers            |
| 111 | 8%  | Porridge                          |

## TODDLERS

| Country     | Survey                                                                                     | Population average | Total High Level Intake |          |          |
|-------------|--------------------------------------------------------------------------------------------|--------------------|-------------------------|----------|----------|
|             |                                                                                            |                    | Method A                | Method B | Method C |
| Belgium     | Regional Flanders                                                                          | 1.33               | 3.12                    | 1.33     | 1.33     |
| Bulgaria    | NUTRICHILD                                                                                 | 0.38               | 1.69                    | 1.24     | 0.79     |
| Denmark     | Danish National Dietary survey among infants and young children 2006-2007                  | 0.55               | 2.49                    | 1.93     | 1.17     |
| Finland     | Diabetes Prediction and Prevention Nutrition Study (DIPP) 2001-2009                        | 0.60               | 2.95                    | 2.58     | 1.50     |
|             | Diabetes Prediction and Prevention Nutrition Study (DIPP) 2003 -2006                       | 0.35               | 2.28                    | 2.12     | 1.14     |
| Germany     | Consumption Survey of Food Intake among Infants and Young Children                         | 0.88               | 7.43                    | 6.85     | 1.91     |
| Germany     | Dortmund Nutritional and Anthropometrical Longitudinally Designed (DONALD) Study 2006-2008 | 0.41               | 1.88                    | 1.45     | 0.89     |
| Italy       | Italian National Food Consumption Survey INRAN-SCAI 2005-06                                | 0.30               | 0.59                    | 0.30     | 0.30     |
| Netherlands | DNFCS-Young-Children                                                                       | 1.03               | 5.05                    | 4.08     | 2.38     |
| Spain       | Food patterns of Spanish schoolchildren and adolescents                                    | 0.54               | 1.05                    | 0.54     | 0.54     |
| UK          | Diet and Nutrition Survey of Infants and Young Children, 2011                              | 0.77               | 3.49                    | 2.64     | 2.32     |
|             | National Diet and Nutrition Survey - Years 1-3                                             | 0.84               | 3.49                    | 2.80     | 0.00     |
| Min         |                                                                                            | 0.30               | 0.59                    | 0.30     | 0.00     |
| Max         |                                                                                            | 1.33               | 7.43                    | 6.85     | 2.38     |

| N   | %   | Highest contributor (brand loyal) |
|-----|-----|-----------------------------------|
| 0   | 0%  | Insufficient consumers            |
| 82  | 19% | Corn chips                        |
| 510 | 56% | Yoghurt, cow milk, with fruit     |
| 229 | 46% | Yoghurt, cow milk, with fruit     |
| 229 | 46% | Yoghurt, cow milk, with fruit     |
| 240 | 69% | Soft drink, fruit content         |
| 73  | 28% | Ices and desserts                 |
| 0   | 0%  | Insufficient consumers            |
| 149 | 46% | Fermented milk products           |
| 0   | 0%  | Insufficient consumers            |
| 145 | 11% | Porridge                          |
| 125 | 68% | Soft drink, fruit content         |

## OTHER CHILDREN

| Country        | Survey                                                                                     | Population average | Total High Level Intake |          |          |
|----------------|--------------------------------------------------------------------------------------------|--------------------|-------------------------|----------|----------|
|                |                                                                                            |                    | Method A                | Method B | Method C |
| Austria        | Austrian Study on Nutritional Status 2010-12 - Children                                    | 0.56               | 1.76                    | 1.00     | 0.78     |
| Belgium        | Regional Flanders                                                                          | 1.08               | 5.68                    | 4.50     | 2.27     |
| Bulgaria       | NUTRICHILD                                                                                 | 0.43               | 3.51                    | 2.96     | 0.93     |
| Czech Republic | Czech National Food Consumption Survey                                                     | 0.58               | 3.84                    | 3.29     | 1.06     |
| Denmark        | Danish Dietary Survey                                                                      | 0.44               | 2.59                    | 2.23     | 0.69     |
|                | The Danish National Dietary survey 2005-2008                                               | 0.39               | 2.05                    | 1.66     | 0.68     |
| Finland        | Diabetes Prediction and Prevention Nutrition Study (DIPP) 2001-2009                        | 0.46               | 1.90                    | 1.53     | 0.93     |
|                | Diabetes Prediction and Prevention Nutrition Study (DIPP) 2003 -2006                       | 0.44               | 1.96                    | 1.54     | 0.91     |
| France         | Individual and national study on food consumption 2                                        | 0.50               | 2.43                    | 1.94     | 0.79     |
| Germany        | Consumption Survey of Food Intake among Infants and Young Children                         | 0.85               | 5.41                    | 4.80     | 1.47     |
|                | Dortmund Nutritional and Anthropometrical Longitudinally Designed (DONALD) Study 2006-2008 | 0.64               | 4.07                    | 3.31     | 1.14     |
|                | Eating Study as a KiGGS Module (EsKiMo)                                                    | 0.49               | 3.59                    | 3.09     | 0.99     |
| Greece         | Regional Crete                                                                             | 0.40               | 1.86                    | 1.46     | 0.95     |
| Italy          | Italian National Food Consumption Survey INRAN-SCAI 2005-06                                | 0.23               | 0.69                    | 0.49     | 0.36     |
| Latvia         | National Dietary Survey                                                                    | 0.65               | 2.20                    | 1.52     | 1.06     |
| Netherlands    | DNFCS-Young-Children                                                                       | 0.89               | 4.85                    | 3.85     | 1.97     |
|                | Dutch National food consumption survey 2007 - 2010                                         | 0.87               | 4.60                    | 3.78     | 0.00     |

| N   | %   | Highest contributor (brand loyal) |
|-----|-----|-----------------------------------|
| 100 | 78% | Pastries and cakes                |
| 271 | 43% | Flavoured milk                    |
| 84  | 19% | Soft drink, flavoured             |
| 173 | 44% | Soft drink, flavoured             |
| 443 | 90% | Soft drink, flavoured             |
| 288 | 97% | Soft drinks                       |
| 413 | 55% | Yoghurt, cow milk, with fruit     |
| 210 | 23% | Soft drink, flavoured             |
| 83  | 17% | Soft drink, flavoured             |
| 230 | 78% | Soft drink, fruit content         |
| 220 | 33% | Soft drink, fruit content         |
| 307 | 37% | Soft drink, fruit content         |
| 74  | 9%  | Soft drinks                       |
| 131 | 68% | Pastries and cakes                |
| 74  | 40% | Cereal flakes                     |
| 226 | 24% | Flavoured milk                    |
| 345 | 77% | Soft drink, fruit content         |

| Country | Survey                                                  | Population average | Total High Level Intake |          |          |
|---------|---------------------------------------------------------|--------------------|-------------------------|----------|----------|
|         |                                                         |                    | Method A                | Method B | Method C |
| Spain   | Encuesta de nutrición 2005                              | 0.48               | 1.77                    | 1.33     | 0.00     |
|         | Food patterns of Spanish schoolchildren and adolescents | 0.49               | 2.06                    | 1.54     | 0.00     |
| Sweden  | National Food Administration                            | 0.92               | 3.86                    | 2.85     | 0.00     |
| UK      | National Diet and Nutrition Survey - Years 1-3          | 0.67               | 2.89                    | 2.29     | 0.00     |
|         |                                                         | Minimum:           | 0.23                    | 0.69     | 0.49     |
|         |                                                         | Maximum:           | 1.08                    | 5.68     | 4.80     |

N % Highest contributor (brand loyal)

202 51% Fermented milk products  
202 51% Yoghurt, cow milk, with fruit  
1064 72% Soft drink, fruit content  
524 80% Soft drink, fruit content

## ADOLESCENTS

| Country        | Survey                                                      | Population average | Total High Level Intake |          |          |
|----------------|-------------------------------------------------------------|--------------------|-------------------------|----------|----------|
|                |                                                             |                    | Method A                | Method B | Method C |
| Austria        | Austrian Study on Nutritional Status 2010-12 - Children     | 0.34               | 1.84                    | 1.42     | 0.54     |
| Belgium        | Diet National 2004                                          | 0.31               | 2.44                    | 2.19     | 0.66     |
| Cyprus         | Childhealth                                                 | 0.15               | 1.04                    | 0.90     | 0.29     |
| Czech Republic | Czech National Food Consumption Survey                      | 0.40               | 3.42                    | 3.06     | 0.88     |
| Denmark        | Danish Dietary Survey                                       | 0.31               | 2.22                    | 1.97     | 0.55     |
|                | The Danish National Dietary survey 2005-2008                | 0.22               | 1.38                    | 1.16     | 0.36     |
| Finland        | Nutrition and wellbeing of secondary school pupils          | 0.18               | 1.04                    | 0.88     | 0.35     |
| France         | Individual and national study on food consumption 2         | 0.23               | 1.14                    | 0.91     | 0.37     |
| Germany        | National Nutrition Survey II                                | 0.36               | 2.87                    | 2.54     | 0.76     |
|                | Eating Study as a KiGGS Module (EsKiMo)                     | 0.25               | 2.83                    | 2.61     | 0.72     |
| Italy          | Italian National Food Consumption Survey INRAN-SCAI 2005-06 | 0.12               | 0.56                    | 0.45     | 0.24     |
| Latvia         | National Dietary Survey                                     | 0.43               | 2.37                    | 1.98     | 0.73     |
| Netherlands    | Dutch National food consumption survey 2007 - 2010          | 0.51               | 2.98                    | 2.47     | 1.01     |
| Spain          | Encuesta de nutrición 2005                                  | 0.25               | 1.72                    | 1.47     | 0.49     |
|                | Food patterns of Spanish schoolchildren and adolescents     | 0.26               | 1.88                    | 1.61     | 0.52     |
|                | Spanish Agency for Food Safety (AESAN) - FIAB Survey        | 0.15               | 0.30                    | 0.15     | 0.15     |
| Sweden         | National Food Administration                                | 0.50               | 2.38                    | 1.77     | 0.82     |
| UK             | National Diet and Nutrition Survey - Years 1-3              | 0.34               | 1.70                    | 1.24     | 0.73     |
| Min            |                                                             | 0.12               | 0.30                    | 0.15     | 0.15     |
| Max            |                                                             | 0.51               | 3.42                    | 3.06     | 1.01     |

N % Highest contributor (brand loyal)

103 43% Soft drinks  
238 41% Soft drink, flavoured  
108 36% Soft drinks  
150 50% Soft drink, flavoured  
441 92% Soft drink, flavoured  
345 92% Soft drinks  
81 26% Soft drink, flavoured  
345 92% Soft drink, flavoured  
81 26% Soft drink, fruit content  
177 18% Soft drink, flavoured  
76 31% Ice cream, milk-based  
112 25% Soft drinks  
763 67% Soft drink, fruit content  
93 14% Soft drink, fruit content  
60 29% Soft drinks  
0 0% Insufficient consumers  
557 55% Soft drink, fruit content  
186 28% Soft drink, flavoured

## ADULTS

| Country        | Survey                                                      | Population average | Total High Level Intake |          |          |
|----------------|-------------------------------------------------------------|--------------------|-------------------------|----------|----------|
|                |                                                             |                    | Method A                | Method B | Method C |
| Austria        | Austrian Study on Nutritional Status 2010-12 - Adults       | 0.28               | 0.94                    | 0.70     | 0.48     |
| Belgium        | Diet National 2004                                          | 0.25               | 2.22                    | 2.04     | 0.59     |
| Czech Republic | Czech National Food Consumption Survey                      | 0.18               | 1.85                    | 1.69     | 0.47     |
| Denmark        | Danish Dietary Survey                                       | 0.14               | 1.42                    | 1.32     | 0.35     |
|                | The Danish National Dietary survey 2005-2008                | 0.12               | 1.04                    | 0.94     | 0.26     |
| Finland        | National FINDIET 2012 Survey                                | 0.13               | 1.39                    | 1.28     | 0.55     |
|                | National Findiet Surveys                                    | 0.28               | 1.64                    | 1.46     | 0.75     |
| France         | Individual and national study on food consumption 2         | 0.16               | 0.86                    | 0.74     | 0.34     |
| Germany        | National Nutrition Survey II                                | 0.21               | 2.07                    | 1.92     | 0.84     |
| Hungary        | National Repr Surv                                          | 0.12               | 0.98                    | 0.87     | 0.34     |
| Ireland        | National Adult Nutrition Survey                             | 0.24               | 1.88                    | 1.67     | 1.67     |
|                | North/South Ireland Food Consumption Survey                 | 0.18               | 1.66                    | 1.46     | 1.46     |
| Italy          | Italian National Food Consumption Survey INRAN-SCAI 2005-06 | 0.06               | 0.61                    | 0.56     | 0.20     |
| Latvia         | National Dietary Survey                                     | 0.26               | 1.71                    | 1.48     | 0.51     |
| Netherlands    | Dutch National Dietary Survey 2003                          | 0.31               | 2.19                    | 1.87     | 0.66     |
|                | Dutch National food consumption survey 2007 - 2010          | 0.28               | 1.80                    | 1.53     | 0.57     |
| Romania        | Dieta Pilot Adults                                          | 0.16               | 1.22                    | 1.07     | 0.41     |
| Spain          | Spanish Agency for Food Safety (AESAN) - FIAB Survey        | 0.10               | 0.90                    | 0.81     | 0.24     |
|                | Spanish Agency for Food Safety (AESAN) Survey               | 0.12               | 0.52                    | 0.39     | 0.22     |
| Sweden         | Swedish National Dietary Survey - RIKSMATEN 1997-98         | 0.28               | 1.52                    | 1.35     | 0.62     |

N % Highest contributor (brand loyal)

88 29% Fermented milk products  
354 27% Soft drink, flavoured  
358 21% Soft drink, flavoured  
1824 65% Soft drink, flavoured  
1297 75% Soft drinks  
61 4% Soft drink, fruit content  
60 5% Soft drink, fruit content  
261 11% Soft drink, flavoured  
875 8% Soft drink, flavoured  
269 25% Soft drink, flavoured  
78 6% Cider  
61 6% Cider  
115 5% Soft drink, fruit content  
109 9% Soft drinks  
318 42% Soft drink, fruit content  
651 32% Soft drink, fruit content  
270 22% Soft drink, flavoured  
101 10% Soft drink, flavoured  
60 15% Ice cream, milk-based  
774 64% Soft drink, flavoured

| Country | Survey                                                     | Population average | Total High Level Intake |          |          |
|---------|------------------------------------------------------------|--------------------|-------------------------|----------|----------|
|         |                                                            |                    | Method A                | Method B | Method C |
| UK      | Swedish National Dietary Survey - Riksmaten adults 2010-11 | 0.26               | 1.24                    | 1.02     | 0.47     |
|         | National Diet and Nutrition Survey                         | 0.21               | 1.72                    | 1.50     | 1.50     |
|         | National Diet and Nutrition Survey - Years 1-3             | 0.21               | 1.72                    | 1.49     | 1.49     |
| Min     |                                                            | 0.06               | 0.52                    | 0.39     | 0.20     |
| Max     |                                                            | 0.31               | 2.22                    | 2.04     | 1.67     |

N % Highest contributor (brand loyal)

337 24% Soft drink, fruit content  
94 5% Cider  
69 5% Cider

## ELDERLY

| Country     | Survey                                                      | Population average | Total High Level Intake |          |          |
|-------------|-------------------------------------------------------------|--------------------|-------------------------|----------|----------|
|             |                                                             |                    | Method A                | Method B | Method C |
| Austria     | Austrian Study on Nutritional Status 2010-12 - Adults       | 0.23               | 0.43                    | 0.23     | 0.23     |
| Belgium     | Diet National 2004                                          | 0.23               | 1.28                    | 1.12     | 0.47     |
| Denmark     | Danish Dietary Survey                                       | 0.09               | 0.98                    | 0.91     | 0.25     |
|             | The Danish National Dietary survey 2005-2008                | 0.08               | 0.64                    | 0.56     | 0.20     |
| Finland     | National FINDIET 2012 Survey                                | 0.09               | 0.49                    | 0.43     | 0.25     |
|             | National Findiet Surveys                                    | 0.29               | 0.96                    | 0.85     | 0.73     |
| France      | Individual and national study on food consumption 2         | 0.12               | 0.36                    | 0.29     | 0.20     |
| Germany     | National Nutrition Survey II                                | 0.19               | 1.37                    | 1.24     | 0.76     |
| Hungary     | National Repr Surv                                          | 0.11               | 0.74                    | 0.66     | 0.21     |
| Ireland     | National Adult Nutrition Survey                             | 0.22               | 0.76                    | 0.63     | 0.55     |
| Italy       | Italian National Food Consumption Survey INRAN-SCAI 2005-06 | 0.05               | 0.20                    | 0.15     | 0.10     |
| Netherlands | Dutch National food consumption survey 2007 - 2010          | 0.23               | 0.56                    | 0.33     | 0.28     |
|             | Dutch National Food Consumption Surveys - Older Adults      | 0.22               | 0.78                    | 0.59     | 0.42     |
| Romania     | Dieta Pilot Adults                                          | 0.15               | 0.42                    | 0.28     | 0.20     |
| Sweden      | Swedish National Dietary Survey - Riksmaten adults 2010-11  | 0.24               | 0.56                    | 0.38     | 0.32     |
| UK          | National Diet and Nutrition Survey - Years 1-3              | 0.20               | 0.47                    | 0.31     | 0.25     |
| Min         |                                                             | 0.05               | 0.20                    | 0.15     | 0.10     |
| Max         |                                                             | 0.29               | 1.37                    | 1.24     | 0.76     |

N % Highest contributor (brand loyal)

0 0% Insufficient consumers  
84 16% Soft drink, flavoured  
94 30% Soft drink, flavoured  
127 46% Soft drinks  
80 17% Yoghurt, cow milk, with fruit  
221 54% Porridge  
88 33% Quark  
73 4% Soft drink, flavoured  
62 30% Flavoured milk  
68 46% Porridge  
69 24% Cheese  
129 75% Pastries and cakes  
72 25% Ready to eat soups  
70 84% Cheese  
184 62% Prepared mixed vegetable salad  
72 43% Cereal flakes

## VERY ELDERLY

| Country     | Survey                                                      | Population average | Total High Level Intake |          |          |
|-------------|-------------------------------------------------------------|--------------------|-------------------------|----------|----------|
|             |                                                             |                    | Method A                | Method B | Method C |
| Austria     | Austrian Study on Nutritional Status 2010-12 - Adults       | 0.29               | 0.52                    | 0.29     | 0.29     |
| Belgium     | Diet National 2004                                          | 0.26               | 1.77                    | 1.59     | 0.61     |
| Denmark     | Danish Dietary Survey                                       | 0.08               | 0.16                    | 0.08     | 0.08     |
|             | The Danish National Dietary survey 2005-2008                | 0.08               | 0.17                    | 0.08     | 0.08     |
| France      | Individual and national study on food consumption 2         | 0.12               | 0.31                    | 0.23     | 0.17     |
| Germany     | National Nutrition Survey II                                | 0.21               | 0.73                    | 0.59     | 0.41     |
| Hungary     | National Repr Surv                                          | 0.11               | 0.27                    | 0.11     | 0.11     |
| Ireland     | National Adult Nutrition Survey                             | 0.25               | 0.40                    | 0.25     | 0.25     |
| Italy       | Italian National Food Consumption Survey INRAN-SCAI 2005-06 | 0.05               | 0.19                    | 0.15     | 0.10     |
| Netherlands | Dutch National Food Consumption Surveys - Older Adults      | 0.26               | 0.85                    | 0.64     | 0.46     |
| Romania     | Dieta Pilot Adults                                          | 0.17               | 0.32                    | 0.17     | 0.17     |
| Sweden      | Swedish National Dietary Survey - Riksmaten adults 2010-11  | 0.26               | 0.62                    | 0.42     | 0.34     |
| UK          | National Diet and Nutrition Survey - Years 1-3              | 0.23               | 0.56                    | 0.36     | 0.29     |
| Min         |                                                             | 0.05               | 0.16                    | 0.08     | 0.08     |
| Max         |                                                             | 0.29               | 1.77                    | 1.59     | 0.61     |

N % Highest contributor (brand loyal)

0 0% Insufficient consumers  
109 15% Soft drink, flavoured  
0 0% Insufficient consumers  
0 0% Insufficient consumers  
65 77% Pastries and cakes  
75 15% Ready to eat soups  
0 0% Insufficient consumers  
0 0% Insufficient consumers  
66 29% Pastries and cakes  
128 28% Ready to eat soups  
0 0% Insufficient consumers  
63 88% Pastries and cakes  
99 71% Pastries and cakes

0 Insufficient consumers  
10% Less than 10% consumers

## COMPREHENSIVE EUROPEAN DIETARY EXPOSURE MODEL

|              |         |
|--------------|---------|
| Anthocyanins | CFS Occ |
|--------------|---------|

mg/kg bw/day

P95 consumers &lt; 60 removed

## INFANTS

| Country  | Survey                                                                    | Population average | Total High Level Intake |          |          |
|----------|---------------------------------------------------------------------------|--------------------|-------------------------|----------|----------|
|          |                                                                           |                    | Method A                | Method B | Method C |
| Bulgaria | NUTRICHILD                                                                | 0.00               | 0.68                    | 0.50     | 0.02     |
| Denmark  | Danish National Dietary survey among infants and young children 2006-2007 | 0.02               | 2.18                    | 1.72     | 0.10     |
| Finland  | Diabetes Prediction and Prevention Nutrition Study (DIPP) 2001-2009       | 0.01               | 0.79                    | 0.58     | 0.03     |
| Germany  | Consumption Survey of Food Intake among Infants and Young Children        | 0.01               | 0.81                    | 0.14     | 0.01     |
| Italy    | Italian National Food Consumption Survey INRAN-SCAI 2005-06               | 0.00               | 0.27                    | 0.00     | 0.00     |
| UK       | Diet and Nutrition Survey of Infants and Young Children, 2011             | 0.02               | 2.19                    | 1.41     | 0.09     |
| Min      |                                                                           | 0.00               | 0.27                    | 0.00     | 0.00     |
| Max      |                                                                           | 0.02               | 2.19                    | 1.72     | 0.10     |

| N   | %   | Highest contributor (brand loyal) |
|-----|-----|-----------------------------------|
| 70  | 8%  | Pastries and cakes                |
| 278 | 34% | Yoghurt, cow milk, with fruit     |
| 378 | 76% | Cereal flakes                     |
| 70  | 44% | Biscuits (cookies)                |
| 0   | 0%  | Insufficient consumers            |
| 111 | 8%  | Porridge                          |

## TODDLERS

| Country     | Survey                                                                                     | Population average | Total High Level Intake |          |          |
|-------------|--------------------------------------------------------------------------------------------|--------------------|-------------------------|----------|----------|
|             |                                                                                            |                    | Method A                | Method B | Method C |
| Belgium     | Regional Flanders                                                                          | 0.08               | 3.12                    | 0.08     | 0.08     |
| Bulgaria    | NUTRICHILD                                                                                 | 0.02               | 1.69                    | 0.91     | 0.04     |
| Denmark     | Danish National Dietary survey among infants and young children 2006-2007                  | 0.04               | 2.49                    | 1.54     | 0.10     |
| Finland     | Diabetes Prediction and Prevention Nutrition Study (DIPP) 2001-2009                        | 0.04               | 2.95                    | 2.17     | 0.13     |
|             | Diabetes Prediction and Prevention Nutrition Study (DIPP) 2003-2006                        | 0.03               | 2.28                    | 1.97     | 0.12     |
| Germany     | Consumption Survey of Food Intake among Infants and Young Children                         | 0.05               | 7.43                    | 6.27     | 0.11     |
| Germany     | Dortmund Nutritional and Anthropometrical Longitudinally Designed (DONALD) Study 2006-2008 | 0.03               | 1.88                    | 1.12     | 0.08     |
| Italy       | Italian National Food Consumption Survey INRAN-SCAI 2005-06                                | 0.02               | 0.59                    | 0.02     | 0.02     |
| Netherlands | DNFCS-Young-Children                                                                       | 0.08               | 5.05                    | 3.44     | 0.23     |
| Spain       | Food patterns of Spanish schoolchildren and adolescents                                    | 0.04               | 1.05                    | 0.04     | 0.04     |
| UK          | Diet and Nutrition Survey of Infants and Young Children, 2011                              | 0.04               | 3.49                    | 1.95     | 0.09     |
|             | National Diet and Nutrition Survey - Years 1-3                                             | 0.04               | 3.49                    | 2.08     | 0.00     |
| Min         |                                                                                            | 0.02               | 0.59                    | 0.02     | 0.00     |
| Max         |                                                                                            | 0.08               | 7.43                    | 6.27     | 0.23     |

| N   | %   | Highest contributor (brand loyal) |
|-----|-----|-----------------------------------|
| 0   | 0%  | Insufficient consumers            |
| 82  | 19% | Corn chips                        |
| 510 | 56% | Yoghurt, cow milk, with fruit     |
| 229 | 46% | Yoghurt, cow milk, with fruit     |
| 229 | 46% | Yoghurt, cow milk, with fruit     |
| 240 | 69% | Soft drink, fruit content         |
| 69  | 26% | Yoghurt, cow milk, with fruit     |
| 0   | 0%  | Insufficient consumers            |
| 149 | 46% | Fermented milk products           |
| 0   | 0%  | Insufficient consumers            |
| 145 | 11% | Porridge                          |
| 125 | 68% | Soft drink, fruit content         |

## OTHER CHILDREN

| Country        | Survey                                                                                     | Population average | Total High Level Intake |          |          |
|----------------|--------------------------------------------------------------------------------------------|--------------------|-------------------------|----------|----------|
|                |                                                                                            |                    | Method A                | Method B | Method C |
| Austria        | Austrian Study on Nutritional Status 2010-12 - Children                                    | 0.03               | 1.76                    | 0.54     | 0.04     |
| Belgium        | Regional Flanders                                                                          | 0.07               | 5.68                    | 3.60     | 0.20     |
| Bulgaria       | NUTRICHILD                                                                                 | 0.02               | 3.51                    | 2.59     | 0.06     |
| Czech Republic | Czech National Food Consumption Survey                                                     | 0.04               | 3.84                    | 2.84     | 0.07     |
| Denmark        | Danish Dietary Survey                                                                      | 0.03               | 2.59                    | 1.96     | 0.05     |
|                | The Danish National Dietary survey 2005-2008                                               | 0.03               | 2.05                    | 1.38     | 0.06     |
| Finland        | Diabetes Prediction and Prevention Nutrition Study (DIPP) 2001-2009                        | 0.03               | 1.90                    | 1.22     | 0.08     |
|                | Diabetes Prediction and Prevention Nutrition Study (DIPP) 2003-2006                        | 0.03               | 1.89                    | 1.24     | 0.09     |
| France         | Individual and national study on food consumption 2                                        | 0.03               | 2.43                    | 1.48     | 0.05     |
| Germany        | Consumption Survey of Food Intake among Infants and Young Children                         | 0.05               | 5.41                    | 4.24     | 0.09     |
|                | Dortmund Nutritional and Anthropometrical Longitudinally Designed (DONALD) Study 2006-2008 | 0.04               | 4.07                    | 2.77     | 0.08     |
|                | Eating Study as a KiGGS Module (EsKiMo)                                                    | 0.03               | 3.59                    | 2.69     | 0.06     |
| Greece         | Regional Crete                                                                             | 0.02               | 1.86                    | 1.08     | 0.05     |
| Italy          | Italian National Food Consumption Survey INRAN-SCAI 2005-06                                | 0.01               | 0.69                    | 0.32     | 0.02     |
| Latvia         | National Dietary Survey                                                                    | 0.02               | 2.20                    | 0.95     | 0.04     |
| Netherlands    | DNFCS-Young-Children                                                                       | 0.07               | 4.85                    | 3.08     | 0.19     |
|                | Dutch National food consumption survey 2007 - 2010                                         | 0.06               | 4.60                    | 3.18     | 0.00     |

| N   | %   | Highest contributor (brand loyal) |
|-----|-----|-----------------------------------|
| 100 | 78% | Pastries and cakes                |
| 271 | 43% | Flavoured milk                    |
| 84  | 19% | Soft drink, flavoured             |
| 173 | 44% | Soft drink, flavoured             |
| 443 | 90% | Soft drink, flavoured             |
| 288 | 97% | Soft drinks                       |
| 413 | 55% | Yoghurt, cow milk, with fruit     |
| 512 | 55% | Yoghurt, cow milk, with fruit     |
| 83  | 17% | Soft drink, flavoured             |
| 230 | 78% | Soft drink, fruit content         |
| 220 | 33% | Soft drink, fruit content         |
| 307 | 37% | Soft drink, fruit content         |
| 74  | 9%  | Soft drinks                       |
| 131 | 68% | Pastries and cakes                |
| 74  | 40% | Cereal flakes                     |
| 226 | 24% | Flavoured milk                    |
| 345 | 77% | Soft drink, fruit content         |



| Country | Survey                                                  | Population average | Total High Level Intake |          |          |
|---------|---------------------------------------------------------|--------------------|-------------------------|----------|----------|
|         |                                                         |                    | Method A                | Method B | Method C |
| Spain   | Encuesta de nutrición 2005                              | 0.03               | 1.77                    | 0.97     | 0.00     |
|         | Food patterns of Spanish schoolchildren and adolescents | 0.03               | 2.06                    | 1.19     | 0.00     |
| Sweden  | National Food Administration                            | 0.06               | 3.86                    | 2.09     | 0.00     |
| UK      | National Diet and Nutrition Survey - Years 1-3          | 0.03               | 2.89                    | 1.74     | 0.00     |
|         |                                                         | Minimum:           | 0.01                    | 0.69     | 0.32     |
|         |                                                         | Maximum:           | 0.07                    | 5.68     | 4.24     |

N % Highest contributor (brand loyal)

202 51% Fermented milk products  
202 51% Yoghurt, cow milk, with fruit  
1064 72% Soft drink, fruit content  
524 80% Soft drink, fruit content

## ADOLESCENTS

| Country        | Survey                                                      | Population average | Total High Level Intake |          |          |
|----------------|-------------------------------------------------------------|--------------------|-------------------------|----------|----------|
|                |                                                             |                    | Method A                | Method B | Method C |
| Austria        | Austrian Study on Nutritional Status 2010-12 - Children     | 0.02               | 1.84                    | 1.14     | 0.04     |
| Belgium        | Diet National 2004                                          | 0.01               | 2.44                    | 1.95     | 0.03     |
| Cyprus         | Childhealth                                                 | 0.01               | 1.04                    | 0.78     | 0.01     |
| Czech Republic | Czech National Food Consumption Survey                      | 0.02               | 3.42                    | 2.77     | 0.05     |
| Denmark        | Danish Dietary Survey                                       | 0.02               | 2.22                    | 1.80     | 0.04     |
|                | The Danish National Dietary survey 2005-2008                | 0.01               | 1.38                    | 1.02     | 0.03     |
| Finland        | Nutrition and wellbeing of secondary school pupils          | 0.01               | 1.04                    | 0.72     | 0.03     |
| France         | Individual and national study on food consumption 2         | 0.01               | 1.14                    | 0.70     | 0.02     |
| Germany        | National Nutrition Survey II                                | 0.02               | 2.87                    | 2.26     | 0.04     |
|                | Eating Study as a KiGGS Module (EsKiMo)                     | 0.01               | 2.83                    | 2.39     | 0.04     |
| Italy          | Italian National Food Consumption Survey INRAN-SCAI 2005-06 | 0.01               | 0.56                    | 0.35     | 0.01     |
| Latvia         | National Dietary Survey                                     | 0.01               | 2.37                    | 1.59     | 0.03     |
| Netherlands    | Dutch National food consumption survey 2007 - 2010          | 0.03               | 2.98                    | 2.10     | 0.09     |
| Spain          | Encuesta de nutrición 2005                                  | 0.01               | 1.72                    | 1.25     | 0.04     |
|                | Food patterns of Spanish schoolchildren and adolescents     | 0.02               | 1.88                    | 1.40     | 0.04     |
|                | Spanish Agency for Food Safety (AESAN) - FIAB Survey        | 0.01               | 0.30                    | 0.01     | 0.01     |
| Sweden         | National Food Administration                                | 0.03               | 2.38                    | 1.36     | 0.07     |
| UK             | National Diet and Nutrition Survey - Years 1-3              | 0.02               | 1.57                    | 0.94     | 0.04     |
| Min            |                                                             | 0.01               | 0.30                    | 0.01     | 0.01     |
| Max            |                                                             | 0.03               | 3.42                    | 2.77     | 0.09     |

N % Highest contributor (brand loyal)

103 43% Soft drinks  
238 41% Soft drink, flavoured  
108 36% Soft drinks  
150 50% Soft drink, flavoured  
441 92% Soft drink, flavoured  
345 92% Soft drinks  
81 26% Soft drink, flavoured  
345 92% Soft drink, flavoured  
81 26% Soft drink, fruit content  
177 18% Soft drink, flavoured  
76 31% Ice cream, milk-based  
112 25% Soft drinks  
763 67% Soft drink, fruit content  
93 14% Soft drink, fruit content  
60 29% Soft drinks  
0 0% Insufficient consumers  
557 55% Soft drink, fruit content  
482 72% Soft drink, fruit content

## ADULTS

| Country        | Survey                                                      | Population average | Total High Level Intake |          |          |
|----------------|-------------------------------------------------------------|--------------------|-------------------------|----------|----------|
|                |                                                             |                    | Method A                | Method B | Method C |
| Austria        | Austrian Study on Nutritional Status 2010-12 - Adults       | 0.01               | 0.94                    | 0.45     | 0.03     |
| Belgium        | Diet National 2004                                          | 0.01               | 2.22                    | 1.84     | 0.03     |
| Czech Republic | Czech National Food Consumption Survey                      | 0.01               | 1.85                    | 1.55     | 0.03     |
| Denmark        | Danish Dietary Survey                                       | 0.01               | 1.42                    | 1.24     | 0.02     |
|                | The Danish National Dietary survey 2005-2008                | 0.01               | 1.04                    | 0.86     | 0.02     |
| Finland        | National FINDIET 2012 Survey                                | 0.01               | 1.39                    | 1.16     | 0.06     |
|                | National Findiet Surveys                                    | 0.01               | 1.64                    | 1.20     | 0.04     |
| France         | Individual and national study on food consumption 2         | 0.01               | 0.86                    | 0.60     | 0.03     |
| Germany        | National Nutrition Survey II                                | 0.01               | 2.07                    | 1.73     | 0.04     |
| Hungary        | National Repr Surv                                          | 0.00               | 0.98                    | 0.76     | 0.02     |
| Ireland        | National Adult Nutrition Survey                             | 0.01               | 1.88                    | 1.46     | 0.17     |
|                | North/South Ireland Food Consumption Survey                 | 0.01               | 1.66                    | 1.31     | 0.15     |
| Italy          | Italian National Food Consumption Survey INRAN-SCAI 2005-06 | 0.00               | 0.61                    | 0.50     | 0.02     |
| Latvia         | National Dietary Survey                                     | 0.01               | 1.71                    | 1.24     | 0.02     |
| Netherlands    | Dutch National Dietary Survey 2003                          | 0.02               | 2.19                    | 1.62     | 0.05     |
|                | Dutch National food consumption survey 2007 - 2010          | 0.01               | 1.80                    | 1.30     | 0.05     |
| Romania        | Dieta Pilot Adults                                          | 0.01               | 1.22                    | 0.93     | 0.02     |
| Spain          | Spanish Agency for Food Safety (AESAN) - FIAB Survey        | 0.01               | 0.90                    | 0.72     | 0.02     |
|                | Spanish Agency for Food Safety (AESAN) Survey               | 0.01               | 0.52                    | 0.28     | 0.01     |
| Sweden         | Swedish National Dietary Survey - RIKSMATEN 1997-98         | 0.01               | 1.52                    | 1.12     | 0.03     |

N % Highest contributor (brand loyal)

88 29% Fermented milk products  
354 27% Soft drink, flavoured  
358 21% Soft drink, flavoured  
1824 65% Soft drink, flavoured  
1297 75% Soft drinks  
61 4% Soft drink, fruit content  
60 5% Soft drink, fruit content  
261 11% Soft drink, flavoured  
875 8% Soft drink, flavoured  
269 25% Soft drink, flavoured  
78 6% Cider  
61 6% Cider  
115 5% Soft drink, fruit content  
109 9% Soft drinks  
318 42% Soft drink, fruit content  
651 32% Soft drink, fruit content  
270 22% Soft drink, flavoured  
101 10% Soft drink, flavoured  
60 15% Ice cream, milk-based  
774 64% Soft drink, flavoured



| Country | Survey                                                     | Population average | Total High Level Intake |          |          |
|---------|------------------------------------------------------------|--------------------|-------------------------|----------|----------|
|         |                                                            |                    | Method A                | Method B | Method C |
| UK      | Swedish National Dietary Survey - Riksmaten adults 2010-11 | 0.01               | 1.24                    | 0.79     | 0.03     |
|         | National Diet and Nutrition Survey                         | 0.01               | 1.72                    | 1.31     | 0.15     |
|         | National Diet and Nutrition Survey - Years 1-3             | 0.01               | 1.32                    | 1.31     | 0.15     |
| Min     |                                                            | 0.00               | 0.52                    | 0.28     | 0.01     |
| Max     |                                                            | 0.02               | 2.22                    | 1.84     | 0.17     |

**N % Highest contributor (brand loyal)**

337 24% Soft drink, fruit content  
 94 5% Cider  
 69 5% Cider

**ELDERLY**

| Country     | Survey                                                      | Population average | Total High Level Intake |          |          |
|-------------|-------------------------------------------------------------|--------------------|-------------------------|----------|----------|
|             |                                                             |                    | Method A                | Method B | Method C |
| Austria     | Austrian Study on Nutritional Status 2010-12 - Adults       | 0.01               | 0.43                    | 0.01     | 0.01     |
| Belgium     | Diet National 2004                                          | 0.01               | 1.28                    | 0.90     | 0.02     |
| Denmark     | Danish Dietary Survey                                       | 0.01               | 0.98                    | 0.84     | 0.02     |
|             | The Danish National Dietary survey 2005-2008                | 0.00               | 0.64                    | 0.49     | 0.02     |
| Finland     | National FINDIET 2012 Survey                                | 0.00               | 0.49                    | 0.36     | 0.02     |
|             | National Findiet Surveys                                    | 0.01               | 0.96                    | 0.73     | 0.03     |
| France      | Individual and national study on food consumption 2         | 0.01               | 0.36                    | 0.18     | 0.01     |
| Germany     | National Nutrition Survey II                                | 0.01               | 1.37                    | 1.06     | 0.02     |
| Hungary     | National Repr Surv                                          | 0.00               | 0.74                    | 0.57     | 0.01     |
| Ireland     | National Adult Nutrition Survey                             | 0.01               | 0.76                    | 0.51     | 0.01     |
| Italy       | Italian National Food Consumption Survey INRAN-SCAI 2005-06 | 0.00               | 0.20                    | 0.11     | 0.00     |
| Netherlands | Dutch National food consumption survey 2007 - 2010          | 0.01               | 0.56                    | 0.13     | 0.01     |
|             | Dutch National Food Consumption Surveys - Older Adults      | 0.01               | 0.78                    | 0.41     | 0.02     |
| Romania     | Dieta Pilot Adults                                          | 0.00               | 0.42                    | 0.16     | 0.01     |
| Sweden      | Swedish National Dietary Survey - Riksmaten adults 2010-11  | 0.01               | 0.56                    | 0.18     | 0.01     |
| UK          | National Diet and Nutrition Survey - Years 1-3              | 0.01               | 0.47                    | 0.14     | 0.01     |
| Min         |                                                             | 0.00               | 0.20                    | 0.01     | 0.00     |
| Max         |                                                             | 0.01               | 1.37                    | 1.06     | 0.03     |

**N % Highest contributor (brand loyal)**

0 0% Insufficient consumers  
 84 16% Soft drink, flavoured  
 94 30% Soft drink, flavoured  
 127 46% Soft drinks  
 80 17% Yoghurt, cow milk, with fruit  
 221 54% Porridge  
 88 33% Quark  
 73 4% Soft drink, flavoured  
 62 30% Flavoured milk  
 68 46% Porridge  
 69 24% Cheese  
 129 75% Pastries and cakes  
 72 25% Ready to eat soups  
 70 84% Cheese  
 184 62% Prepared mixed vegetable salad  
 72 43% Cereal flakes

**VERY ELDERLY**

| Country     | Survey                                                      | Population average | Total High Level Intake |          |          |
|-------------|-------------------------------------------------------------|--------------------|-------------------------|----------|----------|
|             |                                                             |                    | Method A                | Method B | Method C |
| Austria     | Austrian Study on Nutritional Status 2010-12 - Adults       | 0.01               | 0.52                    | 0.01     | 0.01     |
| Belgium     | Diet National 2004                                          | 0.01               | 1.77                    | 1.35     | 0.03     |
| Denmark     | Danish Dietary Survey                                       | 0.00               | 0.16                    | 0.00     | 0.00     |
|             | The Danish National Dietary survey 2005-2008                | 0.00               | 0.17                    | 0.00     | 0.00     |
| France      | Individual and national study on food consumption 2         | 0.01               | 0.31                    | 0.14     | 0.01     |
| Germany     | National Nutrition Survey II                                | 0.01               | 0.73                    | 0.41     | 0.02     |
| Hungary     | National Repr Surv                                          | 0.00               | 0.27                    | 0.00     | 0.00     |
| Ireland     | National Adult Nutrition Survey                             | 0.01               | 0.40                    | 0.01     | 0.01     |
| Italy       | Italian National Food Consumption Survey INRAN-SCAI 2005-06 | 0.00               | 0.19                    | 0.11     | 0.00     |
| Netherlands | Dutch National Food Consumption Surveys - Older Adults      | 0.01               | 0.85                    | 0.43     | 0.03     |
| Romania     | Dieta Pilot Adults                                          | 0.00               | 0.32                    | 0.00     | 0.00     |
| Sweden      | Swedish National Dietary Survey - Riksmaten adults 2010-11  | 0.01               | 0.62                    | 0.20     | 0.01     |
| UK          | National Diet and Nutrition Survey - Years 1-3              | 0.01               | 0.56                    | 0.17     | 0.01     |
| Min         |                                                             | 0.00               | 0.16                    | 0.00     | 0.00     |
| Max         |                                                             | 0.01               | 1.77                    | 1.35     | 0.03     |

**N % Highest contributor (brand loyal)**

0 0% Insufficient consumers  
 109 15% Soft drink, flavoured  
 0 0% Insufficient consumers  
 0 0% Insufficient consumers  
 65 77% Pastries and cakes  
 75 15% Ready to eat soups  
 0 0% Insufficient consumers  
 0 0% Insufficient consumers  
 66 29% Pastries and cakes  
 128 28% Ready to eat soups  
 0 0% Insufficient consumers  
 63 88% Pastries and cakes  
 99 71% Pastries and cakes

0 Insufficient consumers  
 10% Less than 10% consumers

## COMPREHENSIVE EUROPEAN DIETARY EXPOSURE MODEL

|              |         |
|--------------|---------|
| Anthocyanins | CFS Occ |
|--------------|---------|

mg/kg bw/day

P95 consumers &lt; 60 removed

## INFANTS

| Country  | Survey                                                                    | Population average | Total High Level Intake |          |          |
|----------|---------------------------------------------------------------------------|--------------------|-------------------------|----------|----------|
|          |                                                                           |                    | Method A                | Method B | Method C |
| Bulgaria | NUTRICHILD                                                                | 0.00               | 0.68                    | 0.50     | 0.02     |
| Denmark  | Danish National Dietary survey among infants and young children 2006-2007 | 0.02               | 2.18                    | 1.72     | 0.10     |
| Finland  | Diabetes Prediction and Prevention Nutrition Study (DIPP) 2001-2009       | 0.01               | 0.79                    | 0.58     | 0.03     |
| Germany  | Consumption Survey of Food Intake among Infants and Young Children        | 0.01               | 0.81                    | 0.14     | 0.01     |
| Italy    | Italian National Food Consumption Survey INRAN-SCAI 2005-06               | 0.00               | 0.27                    | 0.00     | 0.00     |
| UK       | Diet and Nutrition Survey of Infants and Young Children, 2011             | 0.02               | 2.19                    | 1.41     | 0.09     |
| Min      |                                                                           | 0.00               | 0.27                    | 0.00     | 0.00     |
| Max      |                                                                           | 0.02               | 2.19                    | 1.72     | 0.10     |

| N   | %   | Highest contributor (brand loyal) |
|-----|-----|-----------------------------------|
| 70  | 8%  | Pastries and cakes                |
| 278 | 34% | Yoghurt, cow milk, with fruit     |
| 378 | 76% | Cereal flakes                     |
| 70  | 44% | Biscuits (cookies)                |
| 0   | 0%  | Insufficient consumers            |
| 111 | 8%  | Porridge                          |

## TODDLERS

| Country     | Survey                                                                                     | Population average | Total High Level Intake |          |          |
|-------------|--------------------------------------------------------------------------------------------|--------------------|-------------------------|----------|----------|
|             |                                                                                            |                    | Method A                | Method B | Method C |
| Belgium     | Regional Flanders                                                                          | 0.08               | 3.12                    | 0.08     | 0.08     |
| Bulgaria    | NUTRICHILD                                                                                 | 0.02               | 1.69                    | 0.91     | 0.04     |
| Denmark     | Danish National Dietary survey among infants and young children 2006-2007                  | 0.04               | 2.49                    | 1.54     | 0.10     |
| Finland     | Diabetes Prediction and Prevention Nutrition Study (DIPP) 2001-2009                        | 0.04               | 2.95                    | 2.17     | 0.13     |
|             | Diabetes Prediction and Prevention Nutrition Study (DIPP) 2003-2006                        | 0.03               | 2.28                    | 1.97     | 0.12     |
| Germany     | Consumption Survey of Food Intake among Infants and Young Children                         | 0.05               | 7.43                    | 6.27     | 0.11     |
| Germany     | Dortmund Nutritional and Anthropometrical Longitudinally Designed (DONALD) Study 2006-2008 | 0.03               | 1.88                    | 1.12     | 0.08     |
| Italy       | Italian National Food Consumption Survey INRAN-SCAI 2005-06                                | 0.02               | 0.59                    | 0.02     | 0.02     |
| Netherlands | DNFCS-Young-Children                                                                       | 0.08               | 5.05                    | 3.44     | 0.23     |
| Spain       | Food patterns of Spanish schoolchildren and adolescents                                    | 0.04               | 1.05                    | 0.04     | 0.04     |
| UK          | Diet and Nutrition Survey of Infants and Young Children, 2011                              | 0.04               | 3.49                    | 1.95     | 0.09     |
|             | National Diet and Nutrition Survey - Years 1-3                                             | 0.04               | 3.49                    | 2.08     | 0.00     |
| Min         |                                                                                            | 0.02               | 0.59                    | 0.02     | 0.00     |
| Max         |                                                                                            | 0.08               | 7.43                    | 6.27     | 0.23     |

| N   | %   | Highest contributor (brand loyal) |
|-----|-----|-----------------------------------|
| 0   | 0%  | Insufficient consumers            |
| 82  | 19% | Corn chips                        |
| 510 | 56% | Yoghurt, cow milk, with fruit     |
| 229 | 46% | Yoghurt, cow milk, with fruit     |
| 229 | 46% | Yoghurt, cow milk, with fruit     |
| 240 | 69% | Soft drink, fruit content         |
| 69  | 26% | Yoghurt, cow milk, with fruit     |
| 0   | 0%  | Insufficient consumers            |
| 149 | 46% | Fermented milk products           |
| 0   | 0%  | Insufficient consumers            |
| 145 | 11% | Porridge                          |
| 125 | 68% | Soft drink, fruit content         |

## OTHER CHILDREN

| Country        | Survey                                                                                     | Population average | Total High Level Intake |          |          |
|----------------|--------------------------------------------------------------------------------------------|--------------------|-------------------------|----------|----------|
|                |                                                                                            |                    | Method A                | Method B | Method C |
| Austria        | Austrian Study on Nutritional Status 2010-12 - Children                                    | 0.03               | 1.76                    | 0.54     | 0.04     |
| Belgium        | Regional Flanders                                                                          | 0.07               | 5.68                    | 3.60     | 0.20     |
| Bulgaria       | NUTRICHILD                                                                                 | 0.02               | 3.51                    | 2.59     | 0.06     |
| Czech Republic | Czech National Food Consumption Survey                                                     | 0.04               | 3.84                    | 2.84     | 0.07     |
| Denmark        | Danish Dietary Survey                                                                      | 0.03               | 2.59                    | 1.96     | 0.05     |
|                | The Danish National Dietary survey 2005-2008                                               | 0.03               | 2.05                    | 1.38     | 0.06     |
| Finland        | Diabetes Prediction and Prevention Nutrition Study (DIPP) 2001-2009                        | 0.03               | 1.90                    | 1.22     | 0.08     |
|                | Diabetes Prediction and Prevention Nutrition Study (DIPP) 2003-2006                        | 0.03               | 1.89                    | 1.24     | 0.09     |
| France         | Individual and national study on food consumption 2                                        | 0.03               | 2.43                    | 1.48     | 0.05     |
| Germany        | Consumption Survey of Food Intake among Infants and Young Children                         | 0.05               | 5.41                    | 4.24     | 0.09     |
|                | Dortmund Nutritional and Anthropometrical Longitudinally Designed (DONALD) Study 2006-2008 | 0.04               | 4.07                    | 2.77     | 0.08     |
|                | Eating Study as a KiGGS Module (EsKiMo)                                                    | 0.03               | 3.59                    | 2.69     | 0.06     |
| Greece         | Regional Crete                                                                             | 0.02               | 1.86                    | 1.08     | 0.05     |
| Italy          | Italian National Food Consumption Survey INRAN-SCAI 2005-06                                | 0.01               | 0.69                    | 0.32     | 0.02     |
| Latvia         | National Dietary Survey                                                                    | 0.02               | 2.20                    | 0.95     | 0.04     |
| Netherlands    | DNFCS-Young-Children                                                                       | 0.07               | 4.85                    | 3.08     | 0.19     |
|                | Dutch National food consumption survey 2007 - 2010                                         | 0.06               | 4.60                    | 3.18     | 0.00     |

| N   | %   | Highest contributor (brand loyal) |
|-----|-----|-----------------------------------|
| 100 | 78% | Pastries and cakes                |
| 271 | 43% | Flavoured milk                    |
| 84  | 19% | Soft drink, flavoured             |
| 173 | 44% | Soft drink, flavoured             |
| 443 | 90% | Soft drink, flavoured             |
| 288 | 97% | Soft drinks                       |
| 413 | 55% | Yoghurt, cow milk, with fruit     |
| 512 | 55% | Yoghurt, cow milk, with fruit     |
| 83  | 17% | Soft drink, flavoured             |
| 230 | 78% | Soft drink, fruit content         |
| 220 | 33% | Soft drink, fruit content         |
| 307 | 37% | Soft drink, fruit content         |
| 74  | 9%  | Soft drinks                       |
| 131 | 68% | Pastries and cakes                |
| 74  | 40% | Cereal flakes                     |
| 226 | 24% | Flavoured milk                    |
| 345 | 77% | Soft drink, fruit content         |

| Country | Survey                                                  | Population average | Total High Level Intake |          |          |
|---------|---------------------------------------------------------|--------------------|-------------------------|----------|----------|
|         |                                                         |                    | Method A                | Method B | Method C |
| Spain   | Encuesta de nutrición 2005                              | 0.03               | 1.77                    | 0.97     | 0.00     |
|         | Food patterns of Spanish schoolchildren and adolescents | 0.03               | 2.06                    | 1.19     | 0.00     |
| Sweden  | National Food Administration                            | 0.06               | 3.86                    | 2.09     | 0.00     |
| UK      | National Diet and Nutrition Survey - Years 1-3          | 0.03               | 2.89                    | 1.74     | 0.00     |
|         |                                                         | Minimum:           | 0.01                    | 0.69     | 0.32     |
|         |                                                         | Maximum:           | 0.07                    | 5.68     | 4.24     |

N % Highest contributor (brand loyal)

202 51% Fermented milk products  
202 51% Yoghurt, cow milk, with fruit  
1064 72% Soft drink, fruit content  
524 80% Soft drink, fruit content

## ADOLESCENTS

| Country        | Survey                                                      | Population average | Total High Level Intake |          |          |
|----------------|-------------------------------------------------------------|--------------------|-------------------------|----------|----------|
|                |                                                             |                    | Method A                | Method B | Method C |
| Austria        | Austrian Study on Nutritional Status 2010-12 - Children     | 0.02               | 1.84                    | 1.14     | 0.04     |
| Belgium        | Diet National 2004                                          | 0.01               | 2.44                    | 1.95     | 0.03     |
| Cyprus         | Childhealth                                                 | 0.01               | 1.04                    | 0.78     | 0.01     |
| Czech Republic | Czech National Food Consumption Survey                      | 0.02               | 3.42                    | 2.77     | 0.05     |
| Denmark        | Danish Dietary Survey                                       | 0.02               | 2.22                    | 1.80     | 0.04     |
|                | The Danish National Dietary survey 2005-2008                | 0.01               | 1.38                    | 1.02     | 0.03     |
| Finland        | Nutrition and wellbeing of secondary school pupils          | 0.01               | 1.04                    | 0.72     | 0.03     |
| France         | Individual and national study on food consumption 2         | 0.01               | 1.14                    | 0.70     | 0.02     |
| Germany        | National Nutrition Survey II                                | 0.02               | 2.87                    | 2.26     | 0.04     |
|                | Eating Study as a KiGGS Module (EsKiMo)                     | 0.01               | 2.83                    | 2.39     | 0.04     |
| Italy          | Italian National Food Consumption Survey INRAN-SCAI 2005-06 | 0.01               | 0.56                    | 0.35     | 0.01     |
| Latvia         | National Dietary Survey                                     | 0.01               | 2.37                    | 1.59     | 0.03     |
| Netherlands    | Dutch National food consumption survey 2007 - 2010          | 0.03               | 2.98                    | 2.10     | 0.09     |
| Spain          | Encuesta de nutrición 2005                                  | 0.01               | 1.72                    | 1.25     | 0.04     |
|                | Food patterns of Spanish schoolchildren and adolescents     | 0.02               | 1.88                    | 1.40     | 0.04     |
|                | Spanish Agency for Food Safety (AESAN) - FIAB Survey        | 0.01               | 0.30                    | 0.01     | 0.01     |
| Sweden         | National Food Administration                                | 0.03               | 2.38                    | 1.36     | 0.07     |
| UK             | National Diet and Nutrition Survey - Years 1-3              | 0.02               | 1.57                    | 0.94     | 0.04     |
| Min            |                                                             | 0.01               | 0.30                    | 0.01     | 0.01     |
| Max            |                                                             | 0.03               | 3.42                    | 2.77     | 0.09     |

N % Highest contributor (brand loyal)

103 43% Soft drinks  
238 41% Soft drink, flavoured  
108 36% Soft drinks  
150 50% Soft drink, flavoured  
441 92% Soft drink, flavoured  
345 92% Soft drinks  
81 26% Soft drink, flavoured  
345 92% Soft drink, flavoured  
81 26% Soft drink, fruit content  
177 18% Soft drink, flavoured  
76 31% Ice cream, milk-based  
112 25% Soft drinks  
763 67% Soft drink, fruit content  
93 14% Soft drink, fruit content  
60 29% Soft drinks  
0 0% Insufficient consumers  
557 55% Soft drink, fruit content  
482 72% Soft drink, fruit content

## ADULTS

| Country        | Survey                                                      | Population average | Total High Level Intake |          |          |
|----------------|-------------------------------------------------------------|--------------------|-------------------------|----------|----------|
|                |                                                             |                    | Method A                | Method B | Method C |
| Austria        | Austrian Study on Nutritional Status 2010-12 - Adults       | 0.01               | 0.94                    | 0.45     | 0.03     |
| Belgium        | Diet National 2004                                          | 0.01               | 2.22                    | 1.84     | 0.03     |
| Czech Republic | Czech National Food Consumption Survey                      | 0.01               | 1.85                    | 1.55     | 0.03     |
| Denmark        | Danish Dietary Survey                                       | 0.01               | 1.42                    | 1.24     | 0.02     |
|                | The Danish National Dietary survey 2005-2008                | 0.01               | 1.04                    | 0.86     | 0.02     |
| Finland        | National FINDIET 2012 Survey                                | 0.01               | 1.39                    | 1.16     | 0.06     |
|                | National Findiet Surveys                                    | 0.01               | 1.64                    | 1.20     | 0.04     |
| France         | Individual and national study on food consumption 2         | 0.01               | 0.86                    | 0.60     | 0.03     |
| Germany        | National Nutrition Survey II                                | 0.01               | 2.07                    | 1.73     | 0.04     |
| Hungary        | National Repr Surv                                          | 0.00               | 0.98                    | 0.76     | 0.02     |
| Ireland        | National Adult Nutrition Survey                             | 0.01               | 1.88                    | 1.46     | 0.17     |
|                | North/South Ireland Food Consumption Survey                 | 0.01               | 1.66                    | 1.31     | 0.15     |
| Italy          | Italian National Food Consumption Survey INRAN-SCAI 2005-06 | 0.00               | 0.61                    | 0.50     | 0.02     |
| Latvia         | National Dietary Survey                                     | 0.01               | 1.71                    | 1.24     | 0.02     |
| Netherlands    | Dutch National Dietary Survey 2003                          | 0.02               | 2.19                    | 1.62     | 0.05     |
|                | Dutch National food consumption survey 2007 - 2010          | 0.01               | 1.80                    | 1.30     | 0.05     |
| Romania        | Dieta Pilot Adults                                          | 0.01               | 1.22                    | 0.93     | 0.02     |
| Spain          | Spanish Agency for Food Safety (AESAN) - FIAB Survey        | 0.01               | 0.90                    | 0.72     | 0.02     |
|                | Spanish Agency for Food Safety (AESAN) Survey               | 0.01               | 0.52                    | 0.28     | 0.01     |
| Sweden         | Swedish National Dietary Survey - RIKSMATEN 1997-98         | 0.01               | 1.52                    | 1.12     | 0.03     |

N % Highest contributor (brand loyal)

88 29% Fermented milk products  
354 27% Soft drink, flavoured  
358 21% Soft drink, flavoured  
1824 65% Soft drink, flavoured  
1297 75% Soft drinks  
61 4% Soft drink, fruit content  
60 5% Soft drink, fruit content  
261 11% Soft drink, flavoured  
875 8% Soft drink, flavoured  
269 25% Soft drink, flavoured  
78 6% Cider  
61 6% Cider  
115 5% Soft drink, fruit content  
109 9% Soft drinks  
318 42% Soft drink, fruit content  
651 32% Soft drink, fruit content  
270 22% Soft drink, flavoured  
101 10% Soft drink, flavoured  
60 15% Ice cream, milk-based  
774 64% Soft drink, flavoured

| Country | Survey                                                     | Population average | Total High Level Intake |          |          |
|---------|------------------------------------------------------------|--------------------|-------------------------|----------|----------|
|         |                                                            |                    | Method A                | Method B | Method C |
| UK      | Swedish National Dietary Survey - Riksmaten adults 2010-11 | 0.01               | 1.24                    | 0.79     | 0.03     |
|         | National Diet and Nutrition Survey                         | 0.01               | 1.72                    | 1.31     | 0.15     |
|         | National Diet and Nutrition Survey - Years 1-3             | 0.01               | 1.32                    | 1.31     | 0.15     |
| Min     |                                                            | 0.00               | 0.52                    | 0.28     | 0.01     |
| Max     |                                                            | 0.02               | 2.22                    | 1.84     | 0.17     |

**N % Highest contributor (brand loyal)**

337 24% Soft drink, fruit content  
94 5% Cider  
69 5% Cider

**ELDERLY**

| Country     | Survey                                                      | Population average | Total High Level Intake |          |          |
|-------------|-------------------------------------------------------------|--------------------|-------------------------|----------|----------|
|             |                                                             |                    | Method A                | Method B | Method C |
| Austria     | Austrian Study on Nutritional Status 2010-12 - Adults       | 0.01               | 0.43                    | 0.01     | 0.01     |
| Belgium     | Diet National 2004                                          | 0.01               | 1.28                    | 0.90     | 0.02     |
| Denmark     | Danish Dietary Survey                                       | 0.01               | 0.98                    | 0.84     | 0.02     |
|             | The Danish National Dietary survey 2005-2008                | 0.00               | 0.64                    | 0.49     | 0.02     |
| Finland     | National FINDIET 2012 Survey                                | 0.00               | 0.49                    | 0.36     | 0.02     |
|             | National Findiet Surveys                                    | 0.01               | 0.96                    | 0.73     | 0.03     |
| France      | Individual and national study on food consumption 2         | 0.01               | 0.36                    | 0.18     | 0.01     |
| Germany     | National Nutrition Survey II                                | 0.01               | 1.37                    | 1.06     | 0.02     |
| Hungary     | National Repr Surv                                          | 0.00               | 0.74                    | 0.57     | 0.01     |
| Ireland     | National Adult Nutrition Survey                             | 0.01               | 0.76                    | 0.51     | 0.01     |
| Italy       | Italian National Food Consumption Survey INRAN-SCAI 2005-06 | 0.00               | 0.20                    | 0.11     | 0.00     |
| Netherlands | Dutch National food consumption survey 2007 - 2010          | 0.01               | 0.56                    | 0.13     | 0.01     |
|             | Dutch National Food Consumption Surveys - Older Adults      | 0.01               | 0.78                    | 0.41     | 0.02     |
| Romania     | Dieta Pilot Adults                                          | 0.00               | 0.42                    | 0.16     | 0.01     |
| Sweden      | Swedish National Dietary Survey - Riksmaten adults 2010-11  | 0.01               | 0.56                    | 0.18     | 0.01     |
| UK          | National Diet and Nutrition Survey - Years 1-3              | 0.01               | 0.47                    | 0.14     | 0.01     |
| Min         |                                                             | 0.00               | 0.20                    | 0.01     | 0.00     |
| Max         |                                                             | 0.01               | 1.37                    | 1.06     | 0.03     |

**N % Highest contributor (brand loyal)**

0 0% Insufficient consumers  
84 16% Soft drink, flavoured  
94 30% Soft drink, flavoured  
127 46% Soft drinks  
80 17% Yoghurt, cow milk, with fruit  
221 54% Porridge  
88 33% Quark  
73 4% Soft drink, flavoured  
62 30% Flavoured milk  
68 46% Porridge  
69 24% Cheese  
129 75% Pastries and cakes  
72 25% Ready to eat soups  
70 84% Cheese  
184 62% Prepared mixed vegetable salad  
72 43% Cereal flakes

**VERY ELDERLY**

| Country     | Survey                                                      | Population average | Total High Level Intake |          |          |
|-------------|-------------------------------------------------------------|--------------------|-------------------------|----------|----------|
|             |                                                             |                    | Method A                | Method B | Method C |
| Austria     | Austrian Study on Nutritional Status 2010-12 - Adults       | 0.01               | 0.52                    | 0.01     | 0.01     |
| Belgium     | Diet National 2004                                          | 0.01               | 1.77                    | 1.35     | 0.03     |
| Denmark     | Danish Dietary Survey                                       | 0.00               | 0.16                    | 0.00     | 0.00     |
|             | The Danish National Dietary survey 2005-2008                | 0.00               | 0.17                    | 0.00     | 0.00     |
| France      | Individual and national study on food consumption 2         | 0.01               | 0.31                    | 0.14     | 0.01     |
| Germany     | National Nutrition Survey II                                | 0.01               | 0.73                    | 0.41     | 0.02     |
| Hungary     | National Repr Surv                                          | 0.00               | 0.27                    | 0.00     | 0.00     |
| Ireland     | National Adult Nutrition Survey                             | 0.01               | 0.40                    | 0.01     | 0.01     |
| Italy       | Italian National Food Consumption Survey INRAN-SCAI 2005-06 | 0.00               | 0.19                    | 0.11     | 0.00     |
| Netherlands | Dutch National Food Consumption Surveys - Older Adults      | 0.01               | 0.85                    | 0.43     | 0.03     |
| Romania     | Dieta Pilot Adults                                          | 0.00               | 0.32                    | 0.00     | 0.00     |
| Sweden      | Swedish National Dietary Survey - Riksmaten adults 2010-11  | 0.01               | 0.62                    | 0.20     | 0.01     |
| UK          | National Diet and Nutrition Survey - Years 1-3              | 0.01               | 0.56                    | 0.17     | 0.01     |
| Min         |                                                             | 0.00               | 0.16                    | 0.00     | 0.00     |
| Max         |                                                             | 0.01               | 1.77                    | 1.35     | 0.03     |

**N % Highest contributor (brand loyal)**

0 0% Insufficient consumers  
109 15% Soft drink, flavoured  
0 0% Insufficient consumers  
0 0% Insufficient consumers  
65 77% Pastries and cakes  
75 15% Ready to eat soups  
0 0% Insufficient consumers  
0 0% Insufficient consumers  
66 29% Pastries and cakes  
128 28% Ready to eat soups  
0 0% Insufficient consumers  
63 88% Pastries and cakes  
99 71% Pastries and cakes

0 Insufficient consumers  
10% Less than 10% consumers

## COMPREHENSIVE EUROPEAN DIETARY EXPOSURE MODEL

|              |           |
|--------------|-----------|
| Anthocyanins | Total Occ |
|--------------|-----------|

mg/kg bw/day

P95 consumers &lt; 60 removed

## INFANTS

| Country  | Survey                                                                    | Population average | Total High Level Intake |          |          |
|----------|---------------------------------------------------------------------------|--------------------|-------------------------|----------|----------|
|          |                                                                           |                    | Method A                | Method B | Method C |
| Bulgaria | NUTRICHILD                                                                | 0.01               | 0.68                    | 0.50     | 0.04     |
| Denmark  | Danish National Dietary survey among infants and young children 2006-2007 | 0.04               | 2.18                    | 1.73     | 0.24     |
| Finland  | Diabetes Prediction and Prevention Nutrition Study (DIPP) 2001-2009       | 0.02               | 0.79                    | 0.59     | 0.06     |
| Germany  | Consumption Survey of Food Intake among Infants and Young Children        | 0.03               | 0.81                    | 0.16     | 0.04     |
| Italy    | Italian National Food Consumption Survey INRAN-SCAI 2005-06               | 0.01               | 0.27                    | 0.01     | 0.01     |
| UK       | Diet and Nutrition Survey of Infants and Young Children, 2011             | 0.05               | 2.19                    | 1.44     | 0.20     |
| Min      |                                                                           | 0.01               | 0.27                    | 0.01     | 0.01     |
| Max      |                                                                           | 0.05               | 2.19                    | 1.73     | 0.24     |

| N   | %   | Highest contributor (brand loyal) |
|-----|-----|-----------------------------------|
| 70  | 8%  | Pastries and cakes                |
| 278 | 34% | Yoghurt, cow milk, with fruit     |
| 378 | 76% | Cereal flakes                     |
| 70  | 44% | Biscuits (cookies)                |
| 0   | 0%  | Insufficient consumers            |
| 111 | 8%  | Porridge                          |

## TODDLERS

| Country     | Survey                                                                                     | Population average | Total High Level Intake |          |          |
|-------------|--------------------------------------------------------------------------------------------|--------------------|-------------------------|----------|----------|
|             |                                                                                            |                    | Method A                | Method B | Method C |
| Belgium     | Regional Flanders                                                                          | 0.16               | 3.12                    | 0.16     | 0.16     |
| Bulgaria    | NUTRICHILD                                                                                 | 0.05               | 1.69                    | 0.94     | 0.09     |
| Denmark     | Danish National Dietary survey among infants and young children 2006-2007                  | 0.08               | 2.49                    | 1.56     | 0.24     |
| Finland     | Diabetes Prediction and Prevention Nutrition Study (DIPP) 2001-2009                        | 0.07               | 2.95                    | 2.19     | 0.31     |
|             | Diabetes Prediction and Prevention Nutrition Study (DIPP) 2003-2006                        | 0.07               | 2.28                    | 1.98     | 0.28     |
| Germany     | Consumption Survey of Food Intake among Infants and Young Children                         | 0.13               | 7.43                    | 6.32     | 0.33     |
| Germany     | Dortmund Nutritional and Anthropometrical Longitudinally Designed (DONALD) Study 2006-2008 | 0.06               | 1.88                    | 1.14     | 0.19     |
| Italy       | Italian National Food Consumption Survey INRAN-SCAI 2005-06                                | 0.05               | 0.59                    | 0.05     | 0.05     |
| Netherlands | DNFCS-Young-Children                                                                       | 0.18               | 5.05                    | 3.49     | 0.53     |
| Spain       | Food patterns of Spanish schoolchildren and adolescents                                    | 0.10               | 1.05                    | 0.10     | 0.10     |
| UK          | Diet and Nutrition Survey of Infants and Young Children, 2011                              | 0.09               | 3.49                    | 2.00     | 0.22     |
|             | National Diet and Nutrition Survey - Years 1-3                                             | 0.10               | 3.49                    | 2.13     | 0.00     |
| Min         |                                                                                            | 0.05               | 0.59                    | 0.05     | 0.00     |
| Max         |                                                                                            | 0.18               | 7.43                    | 6.32     | 0.53     |

| N   | %   | Highest contributor (brand loyal) |
|-----|-----|-----------------------------------|
| 0   | 0%  | Insufficient consumers            |
| 82  | 19% | Corn chips                        |
| 510 | 56% | Yoghurt, cow milk, with fruit     |
| 229 | 46% | Yoghurt, cow milk, with fruit     |
| 229 | 46% | Yoghurt, cow milk, with fruit     |
| 240 | 69% | Soft drink, fruit content         |
| 69  | 26% | Yoghurt, cow milk, with fruit     |
| 0   | 0%  | Insufficient consumers            |
| 149 | 46% | Fermented milk products           |
| 0   | 0%  | Insufficient consumers            |
| 145 | 11% | Porridge                          |
| 125 | 68% | Soft drink, fruit content         |

## OTHER CHILDREN

| Country        | Survey                                                                                     | Population average | Total High Level Intake |          |          |
|----------------|--------------------------------------------------------------------------------------------|--------------------|-------------------------|----------|----------|
|                |                                                                                            |                    | Method A                | Method B | Method C |
| Austria        | Austrian Study on Nutritional Status 2010-12 - Children                                    | 0.07               | 1.76                    | 0.58     | 0.10     |
| Belgium        | Regional Flanders                                                                          | 0.15               | 5.68                    | 3.68     | 0.46     |
| Bulgaria       | NUTRICHILD                                                                                 | 0.06               | 3.51                    | 2.62     | 0.15     |
| Czech Republic | Czech National Food Consumption Survey                                                     | 0.09               | 3.84                    | 2.89     | 0.19     |
| Denmark        | Danish Dietary Survey                                                                      | 0.07               | 2.59                    | 1.98     | 0.13     |
|                | The Danish National Dietary survey 2005-2008                                               | 0.06               | 2.05                    | 1.40     | 0.14     |
| Finland        | Diabetes Prediction and Prevention Nutrition Study (DIPP) 2001-2009                        | 0.08               | 1.90                    | 1.25     | 0.20     |
|                | Diabetes Prediction and Prevention Nutrition Study (DIPP) 2003-2006                        | 0.08               | 1.89                    | 1.27     | 0.20     |
| France         | Individual and national study on food consumption 2                                        | 0.07               | 2.43                    | 1.52     | 0.13     |
| Germany        | Consumption Survey of Food Intake among Infants and Young Children                         | 0.13               | 5.41                    | 4.29     | 0.25     |
|                | Dortmund Nutritional and Anthropometrical Longitudinally Designed (DONALD) Study 2006-2008 | 0.10               | 4.07                    | 2.82     | 0.19     |
|                | Eating Study as a KiGGS Module (EsKiMo)                                                    | 0.06               | 3.59                    | 2.72     | 0.16     |
| Greece         | Regional Crete                                                                             | 0.05               | 1.86                    | 1.11     | 0.12     |
| Italy          | Italian National Food Consumption Survey INRAN-SCAI 2005-06                                | 0.03               | 0.69                    | 0.33     | 0.05     |
| Latvia         | National Dietary Survey                                                                    | 0.06               | 2.20                    | 0.98     | 0.08     |
| Netherlands    | DNFCS-Young-Children                                                                       | 0.16               | 4.85                    | 3.17     | 0.44     |
|                | Dutch National food consumption survey 2007 - 2010                                         | 0.15               | 4.60                    | 3.24     | 0.00     |

| N   | %   | Highest contributor (brand loyal) |
|-----|-----|-----------------------------------|
| 100 | 78% | Pastries and cakes                |
| 271 | 43% | Flavoured milk                    |
| 84  | 19% | Soft drink, flavoured             |
| 173 | 44% | Soft drink, flavoured             |
| 443 | 90% | Soft drink, flavoured             |
| 288 | 97% | Soft drinks                       |
| 413 | 55% | Yoghurt, cow milk, with fruit     |
| 512 | 55% | Yoghurt, cow milk, with fruit     |
| 83  | 17% | Soft drink, flavoured             |
| 230 | 78% | Soft drink, fruit content         |
| 220 | 33% | Soft drink, fruit content         |
| 307 | 37% | Soft drink, fruit content         |
| 74  | 9%  | Soft drinks                       |
| 131 | 68% | Pastries and cakes                |
| 74  | 40% | Cereal flakes                     |
| 226 | 24% | Flavoured milk                    |
| 345 | 77% | Soft drink, fruit content         |

| Country | Survey                                                  | Population average | Total High Level Intake |          |          |
|---------|---------------------------------------------------------|--------------------|-------------------------|----------|----------|
|         |                                                         |                    | Method A                | Method B | Method C |
| Spain   | Encuesta de nutrición 2005                              | 0.07               | 1.77                    | 1.00     | 0.00     |
|         | Food patterns of Spanish schoolchildren and adolescents | 0.09               | 2.06                    | 1.22     | 0.00     |
| Sweden  | National Food Administration                            | 0.14               | 3.86                    | 2.16     | 0.00     |
| UK      | National Diet and Nutrition Survey - Years 1-3          | 0.09               | 2.89                    | 1.78     | 0.00     |
|         |                                                         | Minimum:           | 0.03                    | 0.69     | 0.33     |
|         |                                                         | Maximum:           | 0.16                    | 5.68     | 4.29     |

N % Highest contributor (brand loyal)

202 51% Fermented milk products  
202 51% Yoghurt, cow milk, with fruit  
1064 72% Soft drink, fruit content  
524 80% Soft drink, fruit content

## ADOLESCENTS

| Country        | Survey                                                      | Population average | Total High Level Intake |          |          |
|----------------|-------------------------------------------------------------|--------------------|-------------------------|----------|----------|
|                |                                                             |                    | Method A                | Method B | Method C |
| Austria        | Austrian Study on Nutritional Status 2010-12 - Children     | 0.04               | 1.84                    | 1.16     | 0.09     |
| Belgium        | Diet National 2004                                          | 0.04               | 2.44                    | 1.97     | 0.10     |
| Cyprus         | Childhealth                                                 | 0.02               | 1.04                    | 0.79     | 0.04     |
| Czech Republic | Czech National Food Consumption Survey                      | 0.06               | 3.42                    | 2.79     | 0.15     |
| Denmark        | Danish Dietary Survey                                       | 0.05               | 2.22                    | 1.82     | 0.10     |
|                | The Danish National Dietary survey 2005-2008                | 0.03               | 1.38                    | 1.03     | 0.07     |
| Finland        | Nutrition and wellbeing of secondary school pupils          | 0.04               | 1.04                    | 0.74     | 0.08     |
| France         | Individual and national study on food consumption 2         | 0.03               | 1.14                    | 0.72     | 0.06     |
| Germany        | National Nutrition Survey II                                | 0.05               | 2.87                    | 2.28     | 0.12     |
|                | Eating Study as a KiGGS Module (EsKiMo)                     | 0.03               | 2.83                    | 2.41     | 0.12     |
| Italy          | Italian National Food Consumption Survey INRAN-SCAI 2005-06 | 0.02               | 0.56                    | 0.36     | 0.03     |
| Latvia         | National Dietary Survey                                     | 0.04               | 2.37                    | 1.61     | 0.09     |
| Netherlands    | Dutch National food consumption survey 2007 - 2010          | 0.08               | 2.98                    | 2.13     | 0.21     |
| Spain          | Encuesta de nutrición 2005                                  | 0.03               | 1.72                    | 1.27     | 0.09     |
|                | Food patterns of Spanish schoolchildren and adolescents     | 0.04               | 1.88                    | 1.42     | 0.10     |
|                | Spanish Agency for Food Safety (AESAN) - FIAB Survey        | 0.02               | 0.30                    | 0.02     | 0.02     |
| Sweden         | National Food Administration                                | 0.08               | 2.38                    | 1.40     | 0.16     |
| UK             | National Diet and Nutrition Survey - Years 1-3              | 0.04               | 1.57                    | 0.96     | 0.10     |
| Min            |                                                             | 0.02               | 0.30                    | 0.02     | 0.02     |
| Max            |                                                             | 0.08               | 3.42                    | 2.79     | 0.21     |

N % Highest contributor (brand loyal)

103 43% Soft drinks  
238 41% Soft drink, flavoured  
108 36% Soft drinks  
150 50% Soft drink, flavoured  
441 92% Soft drink, flavoured  
345 92% Soft drinks  
81 26% Soft drink, flavoured  
345 92% Soft drink, flavoured  
81 26% Soft drink, fruit content  
177 18% Soft drink, flavoured  
76 31% Ice cream, milk-based  
112 25% Soft drinks  
763 67% Soft drink, fruit content  
93 14% Soft drink, fruit content  
60 29% Soft drinks  
0 0% Insufficient consumers  
557 55% Soft drink, fruit content  
482 72% Soft drink, fruit content

## ADULTS

| Country        | Survey                                                      | Population average | Total High Level Intake |          |          |
|----------------|-------------------------------------------------------------|--------------------|-------------------------|----------|----------|
|                |                                                             |                    | Method A                | Method B | Method C |
| Austria        | Austrian Study on Nutritional Status 2010-12 - Adults       | 0.03               | 0.94                    | 0.46     | 0.08     |
| Belgium        | Diet National 2004                                          | 0.03               | 2.22                    | 1.85     | 0.09     |
| Czech Republic | Czech National Food Consumption Survey                      | 0.02               | 1.85                    | 1.56     | 0.08     |
| Denmark        | Danish Dietary Survey                                       | 0.02               | 1.42                    | 1.25     | 0.06     |
|                | The Danish National Dietary survey 2005-2008                | 0.02               | 1.04                    | 0.87     | 0.05     |
| Finland        | National FINDIET 2012 Survey                                | 0.02               | 1.39                    | 1.17     | 0.24     |
|                | National Findiet Surveys                                    | 0.03               | 1.64                    | 1.22     | 0.10     |
| France         | Individual and national study on food consumption 2         | 0.02               | 0.86                    | 0.61     | 0.12     |
| Germany        | National Nutrition Survey II                                | 0.02               | 2.07                    | 1.74     | 0.17     |
| Hungary        | National Repr Surv                                          | 0.01               | 0.98                    | 0.77     | 0.05     |
| Ireland        | National Adult Nutrition Survey                             | 0.03               | 1.88                    | 1.47     | 0.76     |
|                | North/South Ireland Food Consumption Survey                 | 0.03               | 1.66                    | 1.32     | 0.68     |
| Italy          | Italian National Food Consumption Survey INRAN-SCAI 2005-06 | 0.01               | 0.61                    | 0.50     | 0.04     |
| Latvia         | National Dietary Survey                                     | 0.02               | 1.71                    | 1.25     | 0.07     |
| Netherlands    | Dutch National Dietary Survey 2003                          | 0.04               | 2.19                    | 1.64     | 0.13     |
|                | Dutch National food consumption survey 2007 - 2010          | 0.04               | 1.80                    | 1.32     | 0.11     |
| Romania        | Dieta Pilot Adults                                          | 0.02               | 1.22                    | 0.94     | 0.05     |
| Spain          | Spanish Agency for Food Safety (AESAN) - FIAB Survey        | 0.01               | 0.90                    | 0.73     | 0.05     |
|                | Spanish Agency for Food Safety (AESAN) Survey               | 0.02               | 0.52                    | 0.29     | 0.03     |
| Sweden         | Swedish National Dietary Survey - RIKSMATEN 1997-98         | 0.03               | 1.52                    | 1.13     | 0.06     |

N % Highest contributor (brand loyal)

88 29% Fermented milk products  
354 27% Soft drink, flavoured  
358 21% Soft drink, flavoured  
1824 65% Soft drink, flavoured  
1297 75% Soft drinks  
61 4% Soft drink, fruit content  
60 5% Soft drink, fruit content  
261 11% Soft drink, flavoured  
875 8% Soft drink, flavoured  
269 25% Soft drink, flavoured  
78 6% Cider  
61 6% Cider  
115 5% Soft drink, fruit content  
109 9% Soft drinks  
318 42% Soft drink, fruit content  
651 32% Soft drink, fruit content  
270 22% Soft drink, flavoured  
101 10% Soft drink, flavoured  
60 15% Ice cream, milk-based  
774 64% Soft drink, flavoured

| Country | Survey                                                     | Population average | Total High Level Intake |          |          |
|---------|------------------------------------------------------------|--------------------|-------------------------|----------|----------|
|         |                                                            |                    | Method A                | Method B | Method C |
| UK      | Swedish National Dietary Survey - Riksmaten adults 2010-11 | 0.03               | 1.24                    | 0.80     | 0.13     |
|         | National Diet and Nutrition Survey                         | 0.03               | 1.72                    | 1.33     | 0.69     |
|         | National Diet and Nutrition Survey - Years 1-3             | 0.03               | 1.35                    | 1.32     | 0.68     |
| Min     |                                                            | 0.01               | 0.52                    | 0.29     | 0.03     |
| Max     |                                                            | 0.04               | 2.22                    | 1.85     | 0.76     |

N % Highest contributor (brand loyal)

337 24% Soft drink, fruit content  
94 5% Cider  
69 5% Cider

## ELDERLY

| Country     | Survey                                                      | Population average | Total High Level Intake |          |          |
|-------------|-------------------------------------------------------------|--------------------|-------------------------|----------|----------|
|             |                                                             |                    | Method A                | Method B | Method C |
| Austria     | Austrian Study on Nutritional Status 2010-12 - Adults       | 0.03               | 0.43                    | 0.03     | 0.03     |
| Belgium     | Diet National 2004                                          | 0.02               | 1.28                    | 0.91     | 0.06     |
| Denmark     | Danish Dietary Survey                                       | 0.01               | 0.98                    | 0.84     | 0.05     |
|             | The Danish National Dietary survey 2005-2008                | 0.01               | 0.64                    | 0.49     | 0.04     |
| Finland     | National FINDIET 2012 Survey                                | 0.01               | 0.49                    | 0.36     | 0.05     |
|             | National Findiet Surveys                                    | 0.02               | 0.96                    | 0.74     | 0.07     |
| France      | Individual and national study on food consumption 2         | 0.02               | 0.36                    | 0.19     | 0.03     |
| Germany     | National Nutrition Survey II                                | 0.02               | 1.37                    | 1.08     | 0.06     |
| Hungary     | National Repr Surv                                          | 0.01               | 0.74                    | 0.58     | 0.02     |
| Ireland     | National Adult Nutrition Survey                             | 0.02               | 0.76                    | 0.52     | 0.03     |
| Italy       | Italian National Food Consumption Survey INRAN-SCAI 2005-06 | 0.01               | 0.20                    | 0.12     | 0.01     |
| Netherlands | Dutch National food consumption survey 2007 - 2010          | 0.03               | 0.56                    | 0.14     | 0.03     |
|             | Dutch National Food Consumption Surveys - Older Adults      | 0.02               | 0.78                    | 0.42     | 0.05     |
| Romania     | Dieta Pilot Adults                                          | 0.01               | 0.42                    | 0.17     | 0.02     |
| Sweden      | Swedish National Dietary Survey - Riksmaten adults 2010-11  | 0.02               | 0.56                    | 0.19     | 0.03     |
| UK          | National Diet and Nutrition Survey - Years 1-3              | 0.02               | 0.47                    | 0.15     | 0.03     |
| Min         |                                                             | 0.01               | 0.20                    | 0.03     | 0.01     |
| Max         |                                                             | 0.03               | 1.37                    | 1.08     | 0.07     |

N % Highest contributor (brand loyal)

0 0% Insufficient consumers  
84 16% Soft drink, flavoured  
94 30% Soft drink, flavoured  
127 46% Soft drinks  
80 17% Yoghurt, cow milk, with fruit  
221 54% Porridge  
88 33% Quark  
73 4% Soft drink, flavoured  
62 30% Flavoured milk  
68 46% Porridge  
69 24% Cheese  
129 75% Pastries and cakes  
72 25% Ready to eat soups  
70 84% Cheese  
184 62% Prepared mixed vegetable salad  
72 43% Cereal flakes

## VERY ELDERLY

| Country     | Survey                                                      | Population average | Total High Level Intake |          |          |
|-------------|-------------------------------------------------------------|--------------------|-------------------------|----------|----------|
|             |                                                             |                    | Method A                | Method B | Method C |
| Austria     | Austrian Study on Nutritional Status 2010-12 - Adults       | 0.03               | 0.52                    | 0.03     | 0.03     |
| Belgium     | Diet National 2004                                          | 0.02               | 1.77                    | 1.37     | 0.07     |
| Denmark     | Danish Dietary Survey                                       | 0.01               | 0.16                    | 0.01     | 0.01     |
|             | The Danish National Dietary survey 2005-2008                | 0.01               | 0.17                    | 0.01     | 0.01     |
| France      | Individual and national study on food consumption 2         | 0.02               | 0.31                    | 0.14     | 0.02     |
| Germany     | National Nutrition Survey II                                | 0.02               | 0.73                    | 0.42     | 0.05     |
| Hungary     | National Repr Surv                                          | 0.01               | 0.27                    | 0.01     | 0.01     |
| Ireland     | National Adult Nutrition Survey                             | 0.02               | 0.40                    | 0.02     | 0.02     |
| Italy       | Italian National Food Consumption Survey INRAN-SCAI 2005-06 | 0.01               | 0.19                    | 0.11     | 0.01     |
| Netherlands | Dutch National Food Consumption Surveys - Older Adults      | 0.03               | 0.85                    | 0.45     | 0.06     |
| Romania     | Dieta Pilot Adults                                          | 0.01               | 0.32                    | 0.01     | 0.01     |
| Sweden      | Swedish National Dietary Survey - Riksmaten adults 2010-11  | 0.02               | 0.62                    | 0.21     | 0.03     |
| UK          | National Diet and Nutrition Survey - Years 1-3              | 0.02               | 0.56                    | 0.18     | 0.03     |
| Min         |                                                             | 0.01               | 0.16                    | 0.01     | 0.01     |
| Max         |                                                             | 0.03               | 1.77                    | 1.37     | 0.07     |

N % Highest contributor (brand loyal)

0 0% Insufficient consumers  
109 15% Soft drink, flavoured  
0 0% Insufficient consumers  
0 0% Insufficient consumers  
65 77% Pastries and cakes  
75 15% Ready to eat soups  
0 0% Insufficient consumers  
0 0% Insufficient consumers  
66 29% Pastries and cakes  
128 28% Ready to eat soups  
0 0% Insufficient consumers  
63 88% Pastries and cakes  
99 71% Pastries and cakes

0 Insufficient consumers  
10% Less than 10% consumers
